# Supplementary material for: Hydantoin analogs inhibit the fully assembled ClpXP protease without affecting the individual peptidase and chaperone domains
Source: Royal Society of Chemistry journal article supplement (doi:10.1039/c9ob01339c), 2019-01-01
Supplement: c9ob01339c2.xlsx [file c9ob01339c2.xlsx]

## Sheet: 1-E1 vs DMSO
Ratio M/L normalized 1	Ratio M/L normalized 2	Ratio M/L normalized 3	Unique peptides	Intensity	-Log t-test p-value	t-test Difference	Uniprot ID	Fasta headers
-2.35756	-2.14283	NaN	3	413460000	1.5178	-2.25019	Q2FZB0	>tr|Q2FZB0|Q2FZB0_STAA8 Ornithine carbamoyltransferase OS=Staphylococcus aureus (strain NCTC 8325) GN=argF PE=3 SV=1 UPId=UP000008816 PPId=UP000008816
-1.78953	-3.06484	-1.35413	3	1392000000	1.24897	-2.0695	Q2FWD8	>sp|Q2FWD8|RL31B_STAA8 50S ribosomal protein L31 type B OS=Staphylococcus aureus (strain NCTC 8325) GN=rpmE2 PE=3 SV=1 UPId=UP000008816 PPId=UP000008816
-2.29885	-2.66713	-1.17252	4	62631000	1.34642	-2.04617	Q2G1N7	>sp|Q2G1N7|SARS_STAA8 HTH-type transcriptional regulator SarS OS=Staphylococcus aureus (strain NCTC 8325) GN=sarS PE=1 SV=1 UPId=UP000008816 PPId=UP000008816;>tr|A0A0E1XCR9|A0A0E1XCR9_STAAU HTH-type transcriptional regulator SarS OS=Staphylococcus aureus s
-1.99628	-2.09525	NaN	4	208670000	1.8126	-2.04577	G5JM00	>tr|G5JM00|G5JM00_9STAP Cell division protein FtsZ (Fragment) OS=Staphylococcus simiae CCM 7213 GN=SS7213T_12607 PE=3 SV=1 UPId=UP000005413 PPId=UP000008816;>sp|Q2FZ89|FTSZ_STAA8 Cell division protein FtsZ OS=Staphylococcus aureus (strain NCTC 8325) GN=fts
-1.74466	-1.00773	-2.50419	7	1141700000	1.25374	-1.75219	Q2FYJ2	>sp|Q2FYJ2|DHA1_STAA8 Alanine dehydrogenase 1 OS=Staphylococcus aureus (strain NCTC 8325) GN=ald1 PE=3 SV=1 UPId=UP000008816 PPId=UP000008816
-0.835155	-1.48304	-2.65542	6	897540000	1.04778	-1.65787	Q2FXZ1	>sp|Q2FXZ1|GRPE_STAA8 Protein GrpE OS=Staphylococcus aureus (strain NCTC 8325) GN=grpE PE=3 SV=1 UPId=UP000008816 PPId=UP000008816
-1.63367	-1.35066	-1.6983	15	3403000000	2.33302	-1.56088	Q2FZS8	>tr|Q2FZS8|Q2FZS8_STAA8 Chaperone protein ClpB OS=Staphylococcus aureus (strain NCTC 8325) GN=clpB PE=3 SV=1 UPId=UP000008816 PPId=UP000008816;>sp|Q99VB5|CLPB_STAAM Chaperone protein ClpB OS=Staphylococcus aureus (strain Mu50 / ATCC 700699) GN=clpB PE=3 SV
-2.46792	NaN	-0.60507	2	8745200	0.45975	-1.53649	Q2FZY9	>sp|Q2FZY9|Y845_STAA8 UPF0337 protein SAOUHSC_00845 OS=Staphylococcus aureus (strain NCTC 8325) GN=SAOUHSC_00845 PE=3 SV=1 UPId=UP000008816 PPId=UP000008816;>tr|C5QT11|C5QT11_9STAP CsbD-like protein OS=Staphylococcus caprae M23864:W1 GN=HMPREF0793_2367 PE=
-1.77473	-1.72018	-0.976705	5	2108800000	1.54439	-1.49054	Q2FZ45	>sp|Q2FZ45|RS16_STAA8 30S ribosomal protein S16 OS=Staphylococcus aureus (strain NCTC 8325) GN=rpsP PE=3 SV=1 UPId=UP000008816 PPId=UP000008816
-1.22982	-1.86317	-1.33716	7	1601800000	1.76669	-1.47672	P0A0G2	>sp|P0A0G2|RL30_STAA8 50S ribosomal protein L30 OS=Staphylococcus aureus (strain NCTC 8325) GN=rpmD PE=1 SV=1 UPId=UP000008816 PPId=UP000008816
-1.24713	-2.32904	-0.571153	6	1516400000	0.942588	-1.38244	Q2FW30	>sp|Q2FW30|RS13_STAA8 30S ribosomal protein S13 OS=Staphylococcus aureus (strain NCTC 8325) GN=rpsM PE=3 SV=1 UPId=UP000008816 PPId=UP000008816
-1.25556	-0.0979075	-2.62638	8	4549000000	0.675461	-1.32662	Q2FYJ3	>sp|Q2FYJ3|TDCB_STAA8 L-threonine dehydratase catabolic TdcB OS=Staphylococcus aureus (strain NCTC 8325) GN=tdcB PE=3 SV=1 UPId=UP000008816 PPId=UP000008816
-2.38678	-0.611951	-0.861977	3	5822200000	0.835301	-1.2869	Q2FW79	>sp|Q2FW79|Y2425_STAA8 UPF0457 protein SAOUHSC_02425 OS=Staphylococcus aureus (strain NCTC 8325) GN=SAOUHSC_02425 PE=3 SV=1 UPId=UP000008816 PPId=UP000008816
-1.48889	-1.04002	NaN	5	102840000	0.951427	-1.26445	Q2FW81	>sp|Q2FW81|URTF_STAA8 Probable uridylyltransferase SAOUHSC_02423 OS=Staphylococcus aureus (strain NCTC 8325) GN=SAOUHSC_02423 PE=3 SV=1 UPId=UP000008816 PPId=UP000008816
-1.22288	-1.2999	NaN	2	136700000	1.71154	-1.26139	Q2FXA3	>sp|Q2FXA3|DCUP_STAA8 Uroporphyrinogen decarboxylase OS=Staphylococcus aureus (strain NCTC 8325) GN=hemE PE=3 SV=1 UPId=UP000008816 PPId=UP000008816
-0.992657	-1.49811	NaN	2	743100000	0.894632	-1.24538	Q2FX05	>tr|Q2FX05|Q2FX05_STAA8 Methionine aminopeptidase OS=Staphylococcus aureus (strain NCTC 8325) GN=map PE=3 SV=1 UPId=UP000008816 PPId=UP000008816
-0.967616	NaN	-1.41915	3	173760000	0.924338	-1.19339	Q2G1F2	>sp|Q2G1F2|AZOR_STAA8 FMN-dependent NADH-azoreductase OS=Staphylococcus aureus (strain NCTC 8325) GN=azoR PE=3 SV=1 UPId=UP000008816 PPId=UP000008816;>tr|A0A0U0VRE5|A0A0U0VRE5_STAHA FMN-dependent NADH-azoreductase OS=Staphylococcus haemolyticus GN=azoR PE=
-1.07284	-1.12159	-1.31138	19	10560000000	2.41405	-1.16861	Q2FXZ2	>sp|Q2FXZ2|DNAK_STAA8 Chaperone protein DnaK OS=Staphylococcus aureus (strain NCTC 8325) GN=dnaK PE=3 SV=1 UPId=UP000008816 PPId=UP000008816
-1.78062	-0.539762	-1.1269	12	2304900000	1.07036	-1.14909	Q2G030	>sp|Q2G030|TPIS_STAA8 Triosephosphate isomerase OS=Staphylococcus aureus (strain NCTC 8325) GN=tpiA PE=3 SV=1 UPId=UP000008816 PPId=UP000008816
-1.11095	-1.57598	-0.701193	4	3436600000	1.33168	-1.12937	Q2FW14	>sp|Q2FW14|RL29_STAA8 50S ribosomal protein L29 OS=Staphylococcus aureus (strain NCTC 8325) GN=rpmC PE=1 SV=1 UPId=UP000008816 PPId=UP000008816
-1.03676	-1.81566	-0.473388	6	614310000	0.981747	-1.1086	Q2FY79	>sp|Q2FY79|SRRA_STAA8 Transcriptional regulatory protein SrrA OS=Staphylococcus aureus (strain NCTC 8325) GN=srrA PE=3 SV=1 UPId=UP000008816 PPId=UP000008816
-0.654214	-1.37766	-1.16299	3	145880000	1.41724	-1.06496	Q2G2D2	>tr|Q2G2D2|Q2G2D2_STAA8 Transcription termination/antitermination protein NusA OS=Staphylococcus aureus (strain NCTC 8325) GN=nusA PE=3 SV=1 UPId=UP000008816 PPId=UP000008816
-0.412201	-1.59913	NaN	2	285650000	0.469291	-1.00567	A0A0U0	>tr|A0A0U0VMK6|A0A0U0VMK6_STAHA Phosphoglucomutase/phosphomannomutase alpha/beta/subunit OS=Staphylococcus haemolyticus GN=pgcA PE=3 SV=1 UPId=UP000046272 PPId=UP000008816;>sp|Q2FVC1|PGCA_STAA8 Phosphoglucomutase OS=Staphylococcus aureus (strain NCTC 8325)
-0.883942	-1.12676	-0.994581	17	4311000000	2.3122	-1.00176	Q2G0P5	>sp|Q2G0P5|CLPC_STAA8 ATP-dependent Clp protease ATP-binding subunit ClpC OS=Staphylococcus aureus (strain NCTC 8325) GN=clpC PE=1 SV=1 UPId=UP000008816 PPId=UP000008816
-1.84458	0.299792	-1.45363	2	3247900000	0.570551	-0.999473	Q2FXY6	>sp|Q2FXY6|RS20_STAA8 30S ribosomal protein S20 OS=Staphylococcus aureus (strain NCTC 8325) GN=rpsT PE=3 SV=1 UPId=UP000008816 PPId=UP000008816
-1.20967	-0.3459	-1.30101	12	5604900000	1.05188	-0.952193	Q2FVA3	>tr|Q2FVA3|Q2FVA3_STAA8 D-lactate dehydrogenase, putative OS=Staphylococcus aureus (strain NCTC 8325) GN=SAOUHSC_02830 PE=3 SV=1 UPId=UP000008816 PPId=UP000008816
-1.25202	-1.27763	-0.185728	6	4444300000	0.891818	-0.905125	Q2G113	>sp|Q2G113|RS6_STAA8 30S ribosomal protein S6 OS=Staphylococcus aureus (strain NCTC 8325) GN=rpsF PE=3 SV=1 UPId=UP000008816 PPId=UP000008816
-1.09828	-1.26836	-0.34782	7	342500000	1.06874	-0.90482	Q2FZ20	>sp|Q2FZ20|PNP_STAA8 Polyribonucleotide nucleotidyltransferase OS=Staphylococcus aureus (strain NCTC 8325) GN=pnp PE=1 SV=1 UPId=UP000008816 PPId=UP000008816
-1.43304	-1.01181	-0.224746	4	3007400000	0.891049	-0.889863	Q2FW33	>sp|Q2FW33|RL17_STAA8 50S ribosomal protein L17 OS=Staphylococcus aureus (strain NCTC 8325) GN=rplQ PE=1 SV=1 UPId=UP000008816 PPId=UP000008816
-1.14799	-0.342273	-1.13691	3	501340000	1.08838	-0.875724	Q2FXZ3	>sp|Q2FXZ3|DNAJ_STAA8 Chaperone protein DnaJ OS=Staphylococcus aureus (strain NCTC 8325) GN=dnaJ PE=3 SV=1 UPId=UP000008816 PPId=UP000008816
-1.24297	-0.506434	-0.846865	10	2859900000	1.25579	-0.865424	Q2FWY1	>sp|Q2FWY1|PPAC_STAA8 Probable manganese-dependent inorganic pyrophosphatase OS=Staphylococcus aureus (strain NCTC 8325) GN=ppaC PE=3 SV=1 UPId=UP000008816 PPId=UP000008816
-0.535545	-1.89278	-0.102362	6	669720000	0.587988	-0.843563	Q2G0P2	>sp|Q2G0P2|NUSG_STAA8 Transcription termination/antitermination protein NusG OS=Staphylococcus aureus (strain NCTC 8325) GN=nusG PE=3 SV=1 UPId=UP000008816 PPId=UP000008816
-1.18303	-0.32831	-0.999163	7	6279900000	1.074	-0.836834	P48860	>sp|P48860|RL7_STAA8 50S ribosomal protein L7/L12 OS=Staphylococcus aureus (strain NCTC 8325) GN=rplL PE=3 SV=2 UPId=UP000008816 PPId=UP000008816
-0.437453	-0.627435	-1.39664	4	534930000	0.968525	-0.820508	Q2FZG9	>sp|Q2FZG9|RNJ1_STAA8 Ribonuclease J 1 OS=Staphylococcus aureus (strain NCTC 8325) GN=rnj1 PE=1 SV=1 UPId=UP000008816 PPId=UP000008816
0.777235	-1.07125	-2.13166	6	372750000	0.354726	-0.808556	Q2FW07	>sp|Q2FW07|RL4_STAA8 50S ribosomal protein L4 OS=Staphylococcus aureus (strain NCTC 8325) GN=rplD PE=1 SV=1 UPId=UP000008816 PPId=UP000008816
-0.865166	0.356808	-1.91583	5	243940000	0.463969	-0.808062	Q2FVX8	>tr|Q2FVX8|Q2FVX8_STAA8 Molybdenum cofactor biosynthesis protein B OS=Staphylococcus aureus (strain NCTC 8325) GN=SAOUHSC_02544 PE=3 SV=1 UPId=UP000008816 PPId=UP000008816
-1.081	-0.532933	NaN	3	40645000	0.681087	-0.806966	Q2FZ92	>sp|Q2FZ92|MURD_STAA8 UDP-N-acetylmuramoylalanine--D-glutamate ligase OS=Staphylococcus aureus (strain NCTC 8325) GN=murD PE=3 SV=1 UPId=UP000008816 PPId=UP000008816
-1.2109	-0.240626	-0.966316	6	2188700000	0.960158	-0.805946	P60430	>sp|P60430|RL2_STAA8 50S ribosomal protein L2 OS=Staphylococcus aureus (strain NCTC 8325) GN=rplB PE=1 SV=1 UPId=UP000008816 PPId=UP000008816
-0.651563	-1.12216	-0.644101	5	2581900000	1.43884	-0.805941	Q2FYG7	>sp|Q2FYG7|NDK_STAA8 Nucleoside diphosphate kinase OS=Staphylococcus aureus (strain NCTC 8325) GN=ndk PE=3 SV=2 UPId=UP000008816 PPId=UP000008816
-0.800031	-1.07211	-0.533563	3	155400000	1.44864	-0.801903	Q2FZG8	>sp|Q2FZG8|Y1036_STAA8 UPF0356 protein SAOUHSC_01036 OS=Staphylococcus aureus (strain NCTC 8325) GN=SAOUHSC_01036 PE=3 SV=1 UPId=UP000008816 PPId=UP000008816
-0.47209	-0.863385	-1.04519	7	1548400000	1.37136	-0.793553	Q2G2A4	>tr|Q2G2A4|Q2G2A4_STAA8 Dihydrolipoamide S-acetyltransferase component of pyruvate dehydrogenase complex E2, putative OS=Staphylococcus aureus (strain NCTC 8325) GN=SAOUHSC_01042 PE=3 SV=1 UPId=UP000008816 PPId=UP000008816
-0.502242	0.126921	-2.0011	4	541670000	0.473346	-0.792141	Q2FWC3	>sp|Q2FWC3|LUXS_STAA8 S-ribosylhomocysteine lyase OS=Staphylococcus aureus (strain NCTC 8325) GN=luxS PE=3 SV=1 UPId=UP000008816 PPId=UP000008816
-1.14026	-0.563009	-0.633672	2	995270000	1.29775	-0.778979	Q2FWN3	>sp|Q2FWN3|CH10_STAA8 10 kDa chaperonin OS=Staphylococcus aureus (strain NCTC 8325) GN=groS PE=3 SV=1 UPId=UP000008816 PPId=UP000008816;>tr|A0A0Q0WLU0|A0A0Q0WLU0_STAHA 10 kDa chaperonin OS=Staphylococcus haemolyticus GN=groS PE=3 SV=1 UPId=UP000053523 PPId
-0.522037	0.218139	-2.03128	1	40892000	0.44296	-0.778394	Q2G2W5	>tr|Q2G2W5|Q2G2W5_STAA8 Uncharacterized protein OS=Staphylococcus aureus (strain NCTC 8325) GN=SAOUHSC_02630 PE=4 SV=1 UPId=UP000008816 PPId=UP000008816
-0.997292	-0.239932	-1.09381	10	425380000	0.989271	-0.777012	Q2FWC1	>sp|Q2FWC1|PDP_STAA8 Pyrimidine-nucleoside phosphorylase OS=Staphylococcus aureus (strain NCTC 8325) GN=pdp PE=3 SV=1 UPId=UP000008816 PPId=UP000008816
-0.606581	-0.405357	-1.29099	5	296120000	0.985627	-0.767644	Q2FY08	>sp|Q2FY08|SYG_STAA8 Glycine--tRNA ligase OS=Staphylococcus aureus (strain NCTC 8325) GN=glyQS PE=3 SV=1 UPId=UP000008816 PPId=UP000008816
-0.533029	-1.69315	-0.0693318	2	746460000	0.595264	-0.76517	Q2FYQ2	>tr|Q2FYQ2|Q2FYQ2_STAA8 Uncharacterized protein OS=Staphylococcus aureus (strain NCTC 8325) GN=SAOUHSC_01383 PE=4 SV=1 UPId=UP000008816 PPId=UP000008816
-0.771291	-0.975279	-0.545359	4	1000400000	1.59499	-0.763976	P0A0F8	>sp|P0A0F8|RL15_STAA8 50S ribosomal protein L15 OS=Staphylococcus aureus (strain NCTC 8325) GN=rplO PE=1 SV=1 UPId=UP000008816 PPId=UP000008816
NaN	-0.571138	-0.926261	4	386240000	0.82903	-0.7487	Q2FXJ5	>sp|Q2FXJ5|SYY_STAA8 Tyrosine--tRNA ligase OS=Staphylococcus aureus (strain NCTC 8325) GN=tyrS PE=3 SV=1 UPId=UP000008816 PPId=UP000008816
-0.835616	-0.220518	-1.13888	4	542730000	0.944731	-0.731671	Q2FW31	>sp|Q2FW31|RS11_STAA8 30S ribosomal protein S11 OS=Staphylococcus aureus (strain NCTC 8325) GN=rpsK PE=3 SV=1 UPId=UP000008816 PPId=UP000008816
-1.04608	-0.884689	-0.230731	3	579350000	0.992437	-0.7205	Q2FZA4	>tr|Q2FZA4|Q2FZA4_STAA8 Uncharacterized protein OS=Staphylococcus aureus (strain NCTC 8325) GN=SAOUHSC_01135 PE=4 SV=1 UPId=UP000008816 PPId=UP000008816
-0.74852	-1.07058	-0.317188	8	1458300000	1.08366	-0.712094	Q2FXH2	>sp|Q2FXH2|SYL_STAA8 Leucine--tRNA ligase OS=Staphylococcus aureus (strain NCTC 8325) GN=leuS PE=3 SV=1 UPId=UP000008816 PPId=UP000008816
0.509302	-1.91611	NaN	2	374760000	0.176924	-0.703402	Q2G0G6	>tr|Q2G0G6|Q2G0G6_STAA8 Uncharacterized protein OS=Staphylococcus aureus (strain NCTC 8325) GN=SAOUHSC_00603 PE=4 SV=1 UPId=UP000008816 PPId=UP000008816
-0.615213	-0.47691	-1.01544	6	671130000	1.30997	-0.702522	Q2G236	>sp|Q2G236|NADE_STAA8 NH(3)-dependent NAD(+) synthetase OS=Staphylococcus aureus (strain NCTC 8325) GN=nadE PE=3 SV=1 UPId=UP000008816 PPId=UP000008816
-0.604086	-0.795469	NaN	4	535630000	1.06289	-0.699778	Q2FXC3	>sp|Q2FXC3|SPLB_STAA8 Serine protease SplB OS=Staphylococcus aureus (strain NCTC 8325) GN=splB PE=1 SV=1 UPId=UP000008816 PPId=UP000008816
-1.36929	0.209197	-0.938699	5	2663500000	0.559356	-0.699597	P0A0F4	>sp|P0A0F4|RL11_STAA8 50S ribosomal protein L11 OS=Staphylococcus aureus (strain NCTC 8325) GN=rplK PE=3 SV=2 UPId=UP000008816 PPId=UP000008816
-0.533258	-1.35621	-0.20001	3	483140000	0.745034	-0.696493	Q2FZV6	>tr|Q2FZV6|Q2FZV6_STAA8 Leucine aminopeptidase 2, chloroplastic OS=Staphylococcus aureus (strain NCTC 8325) GN=SAOUHSC_00879 PE=3 SV=1 UPId=UP000008816 PPId=UP000008816
-0.876707	-0.459725	-0.745605	14	18159000000	1.52211	-0.694012	Q2G032	>tr|Q2G032|Q2G032_STAA8 Glyceraldehyde-3-phosphate dehydrogenase OS=Staphylococcus aureus (strain NCTC 8325) GN=SAOUHSC_00795 PE=3 SV=1 UPId=UP000008816 PPId=UP000008816
-1.24297	-0.374942	-0.464064	7	1486100000	0.892228	-0.693994	Q2G227	>sp|Q2G227|DEOB_STAA8 Phosphopentomutase OS=Staphylococcus aureus (strain NCTC 8325) GN=deoB PE=3 SV=1 UPId=UP000008816 PPId=UP000008816
-0.938913	-0.32782	-0.771855	2	268360000	1.18669	-0.679529	Q2FXQ1	>sp|Q2FXQ1|RL20_STAA8 50S ribosomal protein L20 OS=Staphylococcus aureus (strain NCTC 8325) GN=rplT PE=1 SV=1 UPId=UP000008816 PPId=UP000008816
-1.05205	-0.339173	-0.634804	4	2072900000	1.08438	-0.675343	Q2G189	>tr|Q2G189|Q2G189_STAA8 ESAT-6-like protein OS=Staphylococcus aureus (strain NCTC 8325) GN=SAOUHSC_00257 PE=3 SV=1 UPId=UP000008816 PPId=UP000008816
-0.37086	-0.554875	-1.07984	3	114650000	1.05626	-0.668525	Q2G261	>sp|Q2G261|SODM2_STAA8 Superoxide dismutase [Mn/Fe] 2 OS=Staphylococcus aureus (strain NCTC 8325) GN=sodM PE=1 SV=1 UPId=UP000008816 PPId=UP000008816
-1.05624	0.199067	-1.14799	8	2180400000	0.578635	-0.668385	Q2FV16	>tr|Q2FV16|Q2FV16_STAA8 Probable malate:quinone oxidoreductase OS=Staphylococcus aureus (strain NCTC 8325) GN=mqo PE=3 SV=1 UPId=UP000008816 PPId=UP000008816
-0.550413	-0.833086	-0.612854	26	9004300000	1.79058	-0.665451	Q2G1D8	>sp|Q2G1D8|PFLB_STAA8 Formate acetyltransferase OS=Staphylococcus aureus (strain NCTC 8325) GN=pflB PE=3 SV=1 UPId=UP000008816 PPId=UP000008816
-0.749458	-0.718443	-0.497563	12	3543800000	1.84353	-0.655155	Q2G218	>sp|Q2G218|LDH1_STAA8 L-lactate dehydrogenase 1 OS=Staphylococcus aureus (strain NCTC 8325) GN=ldh1 PE=3 SV=2 UPId=UP000008816 PPId=UP000008816
-0.768661	-0.641572	-0.538772	12	8872200000	1.98667	-0.649668	Q2G1Y5	>sp|Q2G1Y5|LDH2_STAA8 L-lactate dehydrogenase 2 OS=Staphylococcus aureus (strain NCTC 8325) GN=ldh2 PE=3 SV=1 UPId=UP000008816 PPId=UP000008816
-0.328808	-1.4053	-0.206725	12	2104300000	0.635552	-0.646943	Q2G1R9	>tr|Q2G1R9|Q2G1R9_STAA8 Methionine--tRNA ligase OS=Staphylococcus aureus (strain NCTC 8325) GN=metG PE=3 SV=1 UPId=UP000008816 PPId=UP000008816;>tr|A0A0U0VNB8|A0A0U0VNB8_STAHA Methionyl-tRNA synthetase OS=Staphylococcus haemolyticus GN=metS_2 PE=4 SV=1 UPI
-0.0237521	-0.967791	-0.942478	5	778150000	0.760572	-0.644674	Q2FZD8	>tr|Q2FZD8|Q2FZD8_STAA8 Phenylalanine--tRNA ligase beta subunit OS=Staphylococcus aureus (strain NCTC 8325) GN=pheT PE=3 SV=1 UPId=UP000008816 PPId=UP000008816
-0.99032	-0.439217	-0.437862	10	32743000000	1.11171	-0.622467	Q2FYG2	>tr|Q2FYG2|Q2FYG2_STAA8 DNA-binding protein HU, putative OS=Staphylococcus aureus (strain NCTC 8325) GN=SAOUHSC_01490 PE=3 SV=1 UPId=UP000008816 PPId=UP000008816
-0.877429	-0.587128	-0.399809	5	2243700000	1.33232	-0.621456	Q2G0Q1	>sp|Q2G0Q1|PDXS_STAA8 Pyridoxal 5-phosphate synthase subunit PdxS OS=Staphylococcus aureus (strain NCTC 8325) GN=pdxS PE=3 SV=1 UPId=UP000008816 PPId=UP000008816
-0.428595	-1.39072	-0.0430574	9	2582300000	0.582595	-0.62079	Q2G0Y6	>sp|Q2G0Y6|GUAA_STAA8 GMP synthase [glutamine-hydrolyzing] OS=Staphylococcus aureus (strain NCTC 8325) GN=guaA PE=3 SV=1 UPId=UP000008816 PPId=UP000008816;>tr|C5QPG8|C5QPG8_9STAP GMP synthase [glutamine-hydrolyzing] OS=Staphylococcus caprae M23864:W1 GN=gu
-0.886072	-0.303422	-0.608802	8	1198600000	1.15146	-0.599432	Q2FZD2	>sp|Q2FZD2|THIO_STAA8 Thioredoxin OS=Staphylococcus aureus (strain NCTC 8325) GN=trxA PE=2 SV=1 UPId=UP000008816 PPId=UP000008816
-0.78505	-0.408397	NaN	4	152960000	0.710813	-0.596723	Q2FWW3	>tr|Q2FWW3|Q2FWW3_STAA8 Uncharacterized protein OS=Staphylococcus aureus (strain NCTC 8325) GN=SAOUHSC_02158 PE=4 SV=1 UPId=UP000008816 PPId=UP000008816
-0.317119	-0.867797	NaN	6	301690000	0.557587	-0.592458	Q2G077	>tr|Q2G077|Q2G077_STAA8 Ribonucleotide-disphosphate reductase beta chain, putative OS=Staphylococcus aureus (strain NCTC 8325) GN=SAOUHSC_00743 PE=4 SV=1 UPId=UP000008816 PPId=UP000008816
-0.644685	-0.643745	-0.461856	33	7076800000	1.97136	-0.583429	Q2G0N5	>sp|Q2G0N5|RPOC_STAA8 DNA-directed RNA polymerase subunit beta OS=Staphylococcus aureus (strain NCTC 8325) GN=rpoC PE=3 SV=2 UPId=UP000008816 PPId=UP000008816
-0.37191	-0.958145	-0.402451	5	913750000	1.02788	-0.577502	Q2FXM5	>tr|Q2FXM5|Q2FXM5_STAA8 NADP-dependent malic enzyme, putative OS=Staphylococcus aureus (strain NCTC 8325) GN=SAOUHSC_01810 PE=3 SV=1 UPId=UP000008816 PPId=UP000008816
-0.472725	-0.802853	-0.436056	10	4492200000	1.40515	-0.570545	Q2FZ21	>sp|Q2FZ21|RRF_STAA8 Ribosome-recycling factor OS=Staphylococcus aureus (strain NCTC 8325) GN=frr PE=3 SV=1 UPId=UP000008816 PPId=UP000008816
-1.70927	-0.942441	0.953459	5	1378900000	0.260712	-0.566085	P48940	>sp|P48940|RS7_STAA8 30S ribosomal protein S7 OS=Staphylococcus aureus (strain NCTC 8325) GN=rpsG PE=3 SV=2 UPId=UP000008816 PPId=UP000008816
-0.679063	NaN	-0.444709	3	237490000	0.883105	-0.561886	Q2FZD9	>sp|Q2FZD9|SYFA_STAA8 Phenylalanine--tRNA ligase alpha subunit OS=Staphylococcus aureus (strain NCTC 8325) GN=pheS PE=3 SV=1 UPId=UP000008816 PPId=UP000008816
-0.422851	-0.698847	NaN	4	450110000	0.813636	-0.560849	Q2FWX8	>sp|Q2FWX8|Y2143_STAA8 Uncharacterized protein SAOUHSC_02143 OS=Staphylococcus aureus (strain NCTC 8325) GN=SAOUHSC_02143 PE=3 SV=1 UPId=UP000008816 PPId=UP000008816
-0.787446	-0.815283	-0.0621517	6	1095200000	0.814626	-0.55496	Q2G1C0	>sp|Q2G1C0|ISPD_STAA8 2-C-methyl-D-erythritol 4-phosphate cytidylyltransferase OS=Staphylococcus aureus (strain NCTC 8325) GN=ispD PE=3 SV=1 UPId=UP000008816 PPId=UP000008816
-0.916834	-0.0268297	-0.712548	7	4643900000	0.7527	-0.552071	Q2FW32	>sp|Q2FW32|RPOA_STAA8 DNA-directed RNA polymerase subunit alpha OS=Staphylococcus aureus (strain NCTC 8325) GN=rpoA PE=3 SV=1 UPId=UP000008816 PPId=UP000008816
-0.591096	-0.485827	-0.578332	5	821350000	2.44441	-0.551752	Q2FW17	>sp|Q2FW17|RL24_STAA8 50S ribosomal protein L24 OS=Staphylococcus aureus (strain NCTC 8325) GN=rplX PE=1 SV=1 UPId=UP000008816 PPId=UP000008816
-0.407365	-1.56896	0.326177	5	323390000	0.372828	-0.550051	Q2G2S0	>sp|Q2G2S0|PUR8_STAA8 Adenylosuccinate lyase OS=Staphylococcus aureus (strain NCTC 8325) GN=purB PE=3 SV=1 UPId=UP000008816 PPId=UP000008816
-0.749336	-0.353288	-0.540053	6	6129300000	1.38743	-0.547559	Q2G0S0	>tr|Q2G0S0|Q2G0S0_STAA8 50S ribosomal protein L25 OS=Staphylococcus aureus (strain NCTC 8325) GN=rplY PE=1 SV=1 UPId=UP000008816 PPId=UP000008816
0.443827	-0.112519	-1.96878	3	868660000	0.273853	-0.545825	Q2G1T9	>sp|Q2G1T9|RPOZ_STAA8 DNA-directed RNA polymerase subunit omega OS=Staphylococcus aureus (strain NCTC 8325) GN=rpoZ PE=3 SV=1 UPId=UP000008816 PPId=UP000008816
-1.14683	0.00776273	-0.49145	3	491520000	0.609915	-0.543505	Q2G0D0	>sp|Q2G0D0|Y675_STAA8 Probable transcriptional regulatory protein SAOUHSC_00675 OS=Staphylococcus aureus (strain NCTC 8325) GN=SAOUHSC_00675 PE=3 SV=1 UPId=UP000008816 PPId=UP000008816
-0.0340066	-0.811356	-0.778857	7	324980000	0.778331	-0.541406	Q2G2M6	>sp|Q2G2M6|SYC_STAA8 Cysteine--tRNA ligase OS=Staphylococcus aureus (strain NCTC 8325) GN=cysS PE=3 SV=1 UPId=UP000008816 PPId=UP000008816
-0.421012	-0.905928	-0.257636	6	1903200000	0.94606	-0.528192	P0A0J0	>sp|P0A0J0|SIGA_STAA8 RNA polymerase sigma factor SigA OS=Staphylococcus aureus (strain NCTC 8325) GN=sigA PE=1 SV=1 UPId=UP000008816 PPId=UP000008816
-0.482308	-0.427586	-0.674325	4	1619600000	1.71028	-0.528073	Q2FZH6	>tr|Q2FZH6|Q2FZH6_STAA8 Phosphocarrier protein hpr, putative OS=Staphylococcus aureus (strain NCTC 8325) GN=SAOUHSC_01028 PE=4 SV=1 UPId=UP000008816 PPId=UP000008816
-0.688617	-0.601479	-0.292427	3	3719300000	1.31695	-0.527508	Q2FW28	>sp|Q2FW28|IF1_STAA8 Translation initiation factor IF-1 OS=Staphylococcus aureus (strain NCTC 8325) GN=infA PE=3 SV=1 UPId=UP000008816 PPId=UP000008816
-0.753053	0.0715022	-0.900922	5	274560000	0.651028	-0.527491	Q2FXM8	>sp|Q2FXM8|PFKA_STAA8 ATP-dependent 6-phosphofructokinase OS=Staphylococcus aureus (strain NCTC 8325) GN=pfkA PE=1 SV=2 UPId=UP000008816 PPId=UP000008816
-0.604632	-0.00973493	-0.937718	4	143130000	0.705764	-0.517362	Q2FXX8	>sp|Q2FXX8|MTNN_STAA8 5-methylthioadenosine/S-adenosylhomocysteine nucleosidase OS=Staphylococcus aureus (strain NCTC 8325) GN=mtnN PE=3 SV=1 UPId=UP000008816 PPId=UP000008816
-0.547886	-0.0221896	-0.976953	6	1367800000	0.693049	-0.515676	Q2FZU9	>sp|Q2FZU9|PPI1_STAA8 Putative peptidyl-prolyl cis-trans isomerase OS=Staphylococcus aureus (strain NCTC 8325) GN=SAOUHSC_00891 PE=3 SV=1 UPId=UP000008816 PPId=UP000008816;>sp|Q5HHD1|PPI1_STAAC Putative peptidyl-prolyl cis-trans isomerase OS=Staphylococcus
-0.202632	-0.227717	-1.08544	6	337120000	0.650193	-0.505264	Q2FVX4	>tr|Q2FVX4|Q2FVX4_STAA8 Molybdenum ABC transporter, periplasmic molybdate-binding protein OS=Staphylococcus aureus (strain NCTC 8325) GN=SAOUHSC_02549 PE=4 SV=1 UPId=UP000008816 PPId=UP000008816
-0.383696	-0.790138	-0.336116	10	3017200000	1.13629	-0.503317	P95689	>sp|P95689|SYS_STAA8 Serine--tRNA ligase OS=Staphylococcus aureus (strain NCTC 8325) GN=serS PE=3 SV=1 UPId=UP000008816 PPId=UP000008816
-0.291718	-1.45653	0.252936	2	3561700000	0.369506	-0.498438	Q2G055	>sp|Q2G055|HPF_STAA8 Ribosome hibernation promotion factor OS=Staphylococcus aureus (strain NCTC 8325) GN=hpf PE=1 SV=1 UPId=UP000008816 PPId=UP000008816;>tr|A0A0W3BEM7|A0A0W3BEM7_STAHA Fis family transcriptional regulator OS=Staphylococcus haemolyticus GN
-0.688737	-1.0776	0.274414	2	87394000	0.466648	-0.49731	Q2G2U6	>sp|Q2G2U6|WALR_STAA8 Transcriptional regulatory protein WalR OS=Staphylococcus aureus (strain NCTC 8325) GN=walR PE=1 SV=1 UPId=UP000008816 PPId=UP000008816
-0.348722	NaN	-0.636616	4	424910000	0.742395	-0.492669	Q2FXK7	>tr|Q2FXK7|Q2FXK7_STAA8 GAF domain protein OS=Staphylococcus aureus (strain NCTC 8325) GN=SAOUHSC_01828 PE=4 SV=1 UPId=UP000008816 PPId=UP000008816
-0.155182	-0.829842	NaN	2	141530000	0.417584	-0.492512	Q2G223	>tr|Q2G223|Q2G223_STAA8 Mannose-6-phosphate isomerase, class I OS=Staphylococcus aureus (strain NCTC 8325) GN=SAOUHSC_02976 PE=3 SV=1 UPId=UP000008816 PPId=UP000008816
-0.576807	-0.581573	-0.312648	4	346260000	1.50438	-0.490342	Q2G2H4	>tr|Q2G2H4|Q2G2H4_STAA8 DNA polymerase III subunit beta OS=Staphylococcus aureus (strain NCTC 8325) GN=SAOUHSC_00002 PE=4 SV=1 UPId=UP000008816 PPId=UP000008816;>sp|Q5HK00|DPO3B_STAEQ DNA polymerase III subunit beta OS=Staphylococcus epidermidis (strain AT
-0.0681914	-0.822835	-0.559011	6	1189300000	0.794843	-0.483346	Q2FY40	>tr|Q2FY40|Q2FY40_STAA8 Proline dipeptidase, putative OS=Staphylococcus aureus (strain NCTC 8325) GN=SAOUHSC_01626 PE=3 SV=1 UPId=UP000008816 PPId=UP000008816
-0.098403	-1.53941	0.233141	10	3843500000	0.318614	-0.468226	Q2FZ27	>sp|Q2FZ27|CODY_STAA8 GTP-sensing transcriptional pleiotropic repressor CodY OS=Staphylococcus aureus (strain NCTC 8325) GN=codY PE=3 SV=1 UPId=UP000008816 PPId=UP000008816
-0.246703	-0.99735	-0.158803	4	523370000	0.655765	-0.467619	Q2G045	>sp|Q2G045|HPRK_STAA8 HPr kinase/phosphorylase OS=Staphylococcus aureus (strain NCTC 8325) GN=hprK PE=3 SV=1 UPId=UP000008816 PPId=UP000008816
-0.7387	-0.48706	-0.17479	21	6875700000	0.985237	-0.46685	Q2FZ23	>sp|Q2FZ23|EFTS_STAA8 Elongation factor Ts OS=Staphylococcus aureus (strain NCTC 8325) GN=tsf PE=3 SV=1 UPId=UP000008816 PPId=UP000008816
-0.548307	0.077897	-0.917422	12	12853000000	0.598105	-0.462611	Q2G031	>sp|Q2G031|PGK_STAA8 Phosphoglycerate kinase OS=Staphylococcus aureus (strain NCTC 8325) GN=pgk PE=3 SV=1 UPId=UP000008816 PPId=UP000008816
-0.425096	-1.0233	0.0619294	6	770450000	0.554819	-0.462155	Q2FVB2	>sp|Q2FVB2|F16PC_STAA8 Fructose-1,6-bisphosphatase class 3 OS=Staphylococcus aureus (strain NCTC 8325) GN=fbp PE=3 SV=1 UPId=UP000008816 PPId=UP000008816
0.474662	-0.820031	-1.03723	6	906300000	0.364723	-0.460864	Q2FW22	>sp|Q2FW22|RL18_STAA8 50S ribosomal protein L18 OS=Staphylococcus aureus (strain NCTC 8325) GN=rplR PE=1 SV=1 UPId=UP000008816 PPId=UP000008816
-0.359519	-0.523462	-0.482039	9	2497600000	1.93932	-0.455007	Q2G0P0	>sp|Q2G0P0|RL1_STAA8 50S ribosomal protein L1 OS=Staphylococcus aureus (strain NCTC 8325) GN=rplA PE=3 SV=1 UPId=UP000008816 PPId=UP000008816
-0.3109	NaN	-0.586329	2	87971000	0.722129	-0.448615	A0A0U0	>tr|A0A0U0VE99|A0A0U0VE99_STAHA GTP-binding protein YqeH%2C possibly involved in replication initiation OS=Staphylococcus haemolyticus GN=yqeH PE=4 SV=1 UPId=UP000046272 PPId=UP000008816;>tr|Q2FXY0|Q2FXY0_STAA8 Uncharacterized protein OS=Staphylococcus aur
0.306302	NaN	-1.19323	2	122680000	0.180478	-0.443463	A0A0U0	>tr|A0A0U0VLM0|A0A0U0VLM0_STAHA Elongation factor 4 OS=Staphylococcus haemolyticus GN=lepA PE=3 SV=1 UPId=UP000046272 PPId=UP000008816;>sp|Q2FXY7|LEPA_STAA8 Elongation factor 4 OS=Staphylococcus aureus (strain NCTC 8325) GN=lepA PE=1 SV=1 UPId=UP000008816
-0.379702	-0.589702	-0.324823	9	3365100000	1.47796	-0.431409	Q2FW38	>sp|Q2FW38|RL13_STAA8 50S ribosomal protein L13 OS=Staphylococcus aureus (strain NCTC 8325) GN=rplM PE=1 SV=1 UPId=UP000008816 PPId=UP000008816
-0.138638	-0.276704	-0.871074	10	709210000	0.706494	-0.428806	Q2G0Q3	>sp|Q2G0Q3|SYK_STAA8 Lysine--tRNA ligase OS=Staphylococcus aureus (strain NCTC 8325) GN=lysS PE=3 SV=1 UPId=UP000008816 PPId=UP000008816
-0.442187	-0.33385	-0.506925	5	429280000	1.86477	-0.427654	Q2FZ58	>sp|Q2FZ58|Y1193_STAA8 Uncharacterized protein SAOUHSC_01193 OS=Staphylococcus aureus (strain NCTC 8325) GN=SAOUHSC_01193 PE=3 SV=1 UPId=UP000008816 PPId=UP000008816
0.660097	-1.2766	-0.651737	3	601140000	0.27084	-0.422747	Q2FW23	>sp|Q2FW23|RS5_STAA8 30S ribosomal protein S5 OS=Staphylococcus aureus (strain NCTC 8325) GN=rpsE PE=3 SV=1 UPId=UP000008816 PPId=UP000008816
-0.992437	NaN	0.161386	3	71310000	0.219952	-0.415525	Q2FXN4	>tr|Q2FXN4|Q2FXN4_STAA8 Isocitrate dehydrogenase [NADP] OS=Staphylococcus aureus (strain NCTC 8325) GN=SAOUHSC_01801 PE=3 SV=1 UPId=UP000008816 PPId=UP000008816
NaN	0.144221	-0.97032	3	158410000	0.226261	-0.413049	Q2G0J8	>tr|Q2G0J8|Q2G0J8_STAA8 Phosphomethylpyrimidine kinase OS=Staphylococcus aureus (strain NCTC 8325) GN=SAOUHSC_00562 PE=4 SV=1 UPId=UP000008816 PPId=UP000008816
-0.461755	-0.743726	-0.0220516	12	1502600000	0.719703	-0.409178	Q2FXR8	>sp|Q2FXR8|SYV_STAA8 Valine--tRNA ligase OS=Staphylococcus aureus (strain NCTC 8325) GN=valS PE=3 SV=1 UPId=UP000008816 PPId=UP000008816
-0.488463	-0.538597	-0.197787	15	2449200000	1.21095	-0.408282	Q2G0F8	>sp|Q2G0F8|SYR_STAA8 Arginine--tRNA ligase OS=Staphylococcus aureus (strain NCTC 8325) GN=argS PE=3 SV=1 UPId=UP000008816 PPId=UP000008816
-0.565699	-0.276619	-0.381454	5	2071900000	1.39442	-0.407924	P0A0J3	>sp|P0A0J3|SODM1_STAA8 Superoxide dismutase [Mn] 1 OS=Staphylococcus aureus (strain NCTC 8325) GN=sodA PE=1 SV=1 UPId=UP000008816 PPId=UP000008816
-1.08045	-0.218233	0.0905037	5	273870000	0.432623	-0.402728	Q2G071	>tr|Q2G071|Q2G071_STAA8 Uncharacterized protein OS=Staphylococcus aureus (strain NCTC 8325) GN=SAOUHSC_00749 PE=4 SV=1 UPId=UP000008816 PPId=UP000008816
-0.585706	-0.568075	-0.0451139	7	534630000	0.815393	-0.399631	Q2FY66	>tr|Q2FY66|Q2FY66_STAA8 Glucose-6-phosphate 1-dehydrogenase OS=Staphylococcus aureus (strain NCTC 8325) GN=zwf PE=3 SV=1 UPId=UP000008816 PPId=UP000008816
-0.209671	-0.428999	-0.556304	4	1926000000	1.2296	-0.398324	Q2FXT0	>sp|Q2FXT0|RL27_STAA8 50S ribosomal protein L27 OS=Staphylococcus aureus (strain NCTC 8325) GN=rpmA PE=1 SV=1 UPId=UP000008816 PPId=UP000008816
0.0786238	-0.516555	-0.751905	4	266420000	0.602501	-0.396612	Q2G0Z2	>tr|Q2G0Z2|Q2G0Z2_STAA8 Uncharacterized protein OS=Staphylococcus aureus (strain NCTC 8325) GN=SAOUHSC_00369 PE=4 SV=1 UPId=UP000008816 PPId=UP000008816;>tr|A0A0U1MHU4|A0A0U1MHU4_STAAU Uncharacterized protein OS=Staphylococcus aureus GN=BN1326_30254 PE=4 S
-0.685336	-0.0287337	-0.466794	7	2470300000	0.748863	-0.393621	Q2FWE6	>sp|Q2FWE6|UPP_STAA8 Uracil phosphoribosyltransferase OS=Staphylococcus aureus (strain NCTC 8325) GN=upp PE=3 SV=1 UPId=UP000008816 PPId=UP000008816
-0.382606	-0.51618	-0.26725	9	2260500000	1.48707	-0.388679	Q2FWE5	>sp|Q2FWE5|GLYA_STAA8 Serine hydroxymethyltransferase OS=Staphylococcus aureus (strain NCTC 8325) GN=glyA PE=3 SV=1 UPId=UP000008816 PPId=UP000008816
-0.436825	0.0284319	-0.730387	9	2666900000	0.642289	-0.379593	Q2FXP7	>sp|Q2FXP7|SYT_STAA8 Threonine--tRNA ligase OS=Staphylococcus aureus (strain NCTC 8325) GN=thrS PE=3 SV=1 UPId=UP000008816 PPId=UP000008816
-0.330415	-0.168893	-0.608712	5	3540600000	0.988599	-0.36934	Q2FY41	>sp|Q2FY41|EFP_STAA8 Elongation factor P OS=Staphylococcus aureus (strain NCTC 8325) GN=efp PE=3 SV=1 UPId=UP000008816 PPId=UP000008816
-0.181235	-0.553987	-0.35994	2	1184300000	1.11337	-0.365054	Q2FW08	>sp|Q2FW08|RL23_STAA8 50S ribosomal protein L23 OS=Staphylococcus aureus (strain NCTC 8325) GN=rplW PE=1 SV=1 UPId=UP000008816 PPId=UP000008816
-0.0395698	-0.90016	-0.154127	12	2524300000	0.509863	-0.364619	Q2G2C1	>tr|Q2G2C1|Q2G2C1_STAA8 Pyruvate carboxylase OS=Staphylococcus aureus (strain NCTC 8325) GN=SAOUHSC_01064 PE=4 SV=1 UPId=UP000008816 PPId=UP000008816
-0.60471	-0.164989	-0.31398	8	6777100000	0.968419	-0.361226	Q2FXS8	>sp|Q2FXS8|RL21_STAA8 50S ribosomal protein L21 OS=Staphylococcus aureus (strain NCTC 8325) GN=rplU PE=1 SV=1 UPId=UP000008816 PPId=UP000008816
0.160034	NaN	-0.87802	4	972620000	0.211284	-0.358993	Q2G2F0	>tr|Q2G2F0|Q2G2F0_STAA8 Uncharacterized protein OS=Staphylococcus aureus (strain NCTC 8325) GN=SAOUHSC_01968 PE=4 SV=1 UPId=UP000008816 PPId=UP000008816
-0.375206	-0.265899	-0.431759	7	2341000000	1.74401	-0.357621	Q2G0N9	>sp|Q2G0N9|RL10_STAA8 50S ribosomal protein L10 OS=Staphylococcus aureus (strain NCTC 8325) GN=rplJ PE=3 SV=1 UPId=UP000008816 PPId=UP000008816
-0.7281	-0.293459	-0.040343	9	1236300000	0.657502	-0.353968	Q2G124	>sp|Q2G124|THLA_STAA8 Probable acetyl-CoA acyltransferase OS=Staphylococcus aureus (strain NCTC 8325) GN=SAOUHSC_00336 PE=3 SV=1 UPId=UP000008816 PPId=UP000008816
-0.319218	-0.776307	0.0342799	3	237830000	0.567593	-0.353749	Q2FXP9	>sp|Q2FXP9|IF3_STAA8 Translation initiation factor IF-3 OS=Staphylococcus aureus (strain NCTC 8325) GN=infC PE=3 SV=1 UPId=UP000008816 PPId=UP000008816
-0.806759	-0.136242	-0.110724	10	2459900000	0.579788	-0.351242	Q2FZ53	>tr|Q2FZ53|Q2FZ53_STAA8 3-oxoacyl-(Acyl-carrier-protein) reductase, putative OS=Staphylococcus aureus (strain NCTC 8325) GN=SAOUHSC_01199 PE=1 SV=1 UPId=UP000008816 PPId=UP000008816
-0.575493	-0.502645	0.031618	21	21107000000	0.677931	-0.34884	Q2G028	>sp|Q2G028|ENO_STAA8 Enolase OS=Staphylococcus aureus (strain NCTC 8325) GN=eno PE=1 SV=1 UPId=UP000008816 PPId=UP000008816
-0.415392	0.000523206	-0.627292	7	794230000	0.698403	-0.347387	Q2FXU5	>sp|Q2FXU5|SYD_STAA8 Aspartate--tRNA ligase OS=Staphylococcus aureus (strain NCTC 8325) GN=aspS PE=3 SV=1 UPId=UP000008816 PPId=UP000008816
-0.552099	-0.146737	-0.342614	2	596600000	1.01166	-0.34715	Q2FWB9	>tr|Q2FWB9|Q2FWB9_STAA8 Deoxyribose-phosphate aldolase OS=Staphylococcus aureus (strain NCTC 8325) GN=deoC PE=3 SV=1 UPId=UP000008816 PPId=UP000008816
-0.551793	-0.135843	NaN	5	368190000	0.460511	-0.343818	Q2G0L5	>sp|Q2G0L5|SDRC_STAA8 Serine-aspartate repeat-containing protein C OS=Staphylococcus aureus (strain NCTC 8325) GN=sdrC PE=3 SV=1 UPId=UP000008816 PPId=UP000008816;>sp|Q99W48|SDRC_STAAM Serine-aspartate repeat-containing protein C OS=Staphylococcus aureus (
-0.666157	-0.180211	-0.177763	10	2949000000	0.768834	-0.341377	Q2G0M4	>tr|Q2G0M4|Q2G0M4_STAA8 Branched-chain-amino-acid aminotransferase OS=Staphylococcus aureus (strain NCTC 8325) GN=SAOUHSC_00536 PE=3 SV=1 UPId=UP000008816 PPId=UP000008816
0.0162307	-0.600477	-0.422664	2	325310000	0.68086	-0.335637	Q2FZA1	>tr|Q2FZA1|Q2FZA1_STAA8 Uncharacterized N-acetyltransferase SAOUHSC_01138 OS=Staphylococcus aureus (strain NCTC 8325) GN=SAOUHSC_01138 PE=3 SV=1 UPId=UP000008816 PPId=UP000008816
-0.340325	-1.32672	0.666242	3	351960000	0.207163	-0.333603	Q2FZT7	>tr|Q2FZT7|Q2FZT7_STAA8 Signal peptidase I OS=Staphylococcus aureus (strain NCTC 8325) GN=SAOUHSC_00903 PE=3 SV=1 UPId=UP000008816 PPId=UP000008816
-0.483546	0.115142	-0.59995	15	18306000000	0.549113	-0.322784	Q2G0G1	>sp|Q2G0G1|ADH_STAA8 Alcohol dehydrogenase OS=Staphylococcus aureus (strain NCTC 8325) GN=adh PE=3 SV=1 UPId=UP000008816 PPId=UP000008816
0.100499	-0.137917	-0.930811	1	315630000	0.387973	-0.322743	Q2FYN2	>sp|Q2FYN2|CSPA_STAA8 Cold shock protein CspA OS=Staphylococcus aureus (strain NCTC 8325) GN=cspA PE=1 SV=1 UPId=UP000008816 PPId=UP000008816
0.411276	-0.295989	-1.05129	3	301180000	0.270071	-0.312002	Q2FWY9	>sp|Q2FWY9|GATA_STAA8 Glutamyl-tRNA(Gln) amidotransferase subunit A OS=Staphylococcus aureus (strain NCTC 8325) GN=gatA PE=3 SV=1 UPId=UP000008816 PPId=UP000008816
-0.0146614	-0.0436651	-0.874883	7	2102600000	0.414527	-0.31107	Q2FZX0	>sp|Q2FZX0|NAGD_STAA8 Acid sugar phosphatase OS=Staphylococcus aureus (strain NCTC 8325) GN=nagD PE=3 SV=1 UPId=UP000008816 PPId=UP000008816
0.0599725	-0.681653	NaN	3	58970000	0.255029	-0.31084	Q2FZ59	>tr|Q2FZ59|Q2FZ59_STAA8 Uncharacterized protein OS=Staphylococcus aureus (strain NCTC 8325) GN=SAOUHSC_01192 PE=4 SV=1 UPId=UP000008816 PPId=UP000008816
-1.07339	-0.197222	0.340939	10	1144800000	0.275267	-0.30989	Q2FWF0	>sp|Q2FWF0|ATPB_STAA8 ATP synthase subunit beta OS=Staphylococcus aureus (strain NCTC 8325) GN=atpD PE=3 SV=1 UPId=UP000008816 PPId=UP000008816
0.0162946	-0.659206	-0.277301	5	758460000	0.589561	-0.306738	Q2G1Z0	>tr|Q2G1Z0|Q2G1Z0_STAA8 Uncharacterized protein OS=Staphylococcus aureus (strain NCTC 8325) GN=SAOUHSC_00655 PE=4 SV=1 UPId=UP000008816 PPId=UP000008816
-0.369341	-0.284954	-0.257185	20	7374300000	1.91731	-0.303827	P47768	>sp|P47768|RPOB_STAA8 DNA-directed RNA polymerase subunit beta OS=Staphylococcus aureus (strain NCTC 8325) GN=rpoB PE=3 SV=2 UPId=UP000008816 PPId=UP000008816
-0.423845	-0.176721	-0.291392	23	22159000000	1.27477	-0.297319	Q2FV17	>sp|Q2FV17|ALF1_STAA8 Fructose-bisphosphate aldolase class 1 OS=Staphylococcus aureus (strain NCTC 8325) GN=fda PE=3 SV=1 UPId=UP000008816 PPId=UP000008816
NaN	-0.0892667	-0.503904	3	327250000	0.410742	-0.296585	Q2FYI5	>sp|Q2FYI5|GPSB_STAA8 Cell cycle protein GpsB OS=Staphylococcus aureus (strain NCTC 8325) GN=gpsB PE=3 SV=1 UPId=UP000008816 PPId=UP000008816
0.359514	-1.54004	0.297901	1	290850000	0.165361	-0.294209	Q2G1Y7	>tr|Q2G1Y7|Q2G1Y7_STAA8 Uncharacterized protein OS=Staphylococcus aureus (strain NCTC 8325) GN=SAOUHSC_01061 PE=4 SV=1 UPId=UP000008816 PPId=UP000008816
-0.597701	-0.00907975	-0.252387	12	5535300000	0.627958	-0.286389	Q2FWD3	>tr|Q2FWD3|Q2FWD3_STAA8 Uncharacterized protein OS=Staphylococcus aureus (strain NCTC 8325) GN=SAOUHSC_02366 PE=3 SV=1 UPId=UP000008816 PPId=UP000008816
0.367247	-0.783772	-0.43047	3	289590000	0.306157	-0.282332	Q2G0S3	>sp|Q2G0S3|GLMU_STAA8 Bifunctional protein GlmU OS=Staphylococcus aureus (strain NCTC 8325) GN=glmU PE=3 SV=1 UPId=UP000008816 PPId=UP000008816
-0.404693	-0.226254	-0.212277	13	8248500000	1.344	-0.281075	Q2FXL5	>sp|Q2FXL5|ACKA_STAA8 Acetate kinase OS=Staphylococcus aureus (strain NCTC 8325) GN=ackA PE=3 SV=1 UPId=UP000008816 PPId=UP000008816
-0.728303	-0.12852	0.0153404	2	349030000	0.464428	-0.280494	Q2FZ48	>tr|Q2FZ48|Q2FZ48_STAA8 Signal recognition particle receptor FtsY OS=Staphylococcus aureus (strain NCTC 8325) GN=ftsY PE=3 SV=1 UPId=UP000008816 PPId=UP000008816
-0.155419	0.0115864	-0.677072	12	5797800000	0.497791	-0.273635	Q2G0J0	>tr|Q2G0J0|Q2G0J0_STAA8 Phosphate acetyltransferase OS=Staphylococcus aureus (strain NCTC 8325) GN=SAOUHSC_00574 PE=4 SV=1 UPId=UP000008816 PPId=UP000008816
-0.625791	-0.153823	-0.0411571	5	566860000	0.574878	-0.27359	A0A0U0	>tr|A0A0U0VQM4|A0A0U0VQM4_STAHA Tryptophanyl-tRNA synthetase%3B proteobacterial type OS=Staphylococcus haemolyticus GN=trpS PE=3 SV=1 UPId=UP000046272 PPId=UP000008816;>tr|Q2FZQ7|Q2FZQ7_STAA8 Tryptophan--tRNA ligase OS=Staphylococcus aureus (strain NCTC 83
-0.322032	-0.249002	-0.233869	3	7524100000	1.99417	-0.268301	Q2FZZ8	>sp|Q2FZZ8|GCSH_STAA8 Glycine cleavage system H protein OS=Staphylococcus aureus (strain NCTC 8325) GN=gcvH PE=3 SV=1 UPId=UP000008816 PPId=UP000008816
-0.864615	0.133927	-0.0589172	10	3539300000	0.318642	-0.263202	Q2FZR9	>tr|Q2FZR9|Q2FZR9_STAA8 3-oxoacyl-[acyl-carrier-protein] synthase 2 OS=Staphylococcus aureus (strain NCTC 8325) GN=SAOUHSC_00921 PE=3 SV=1 UPId=UP000008816 PPId=UP000008816
-0.220517	-0.17645	-0.391131	3	425520000	1.24524	-0.262699	Q2FV14	>tr|Q2FV14|Q2FV14_STAA8 Acetyl-CoA synthetase, putative OS=Staphylococcus aureus (strain NCTC 8325) GN=SAOUHSC_02929 PE=4 SV=1 UPId=UP000008816 PPId=UP000008816;>tr|A0A0E1XL82|A0A0E1XL82_STAAU AMP-binding enzyme OS=Staphylococcus aureus subsp. aureus MN8 G
-1.01892	1.13421	-0.893257	7	1839300000	0.127368	-0.259323	Q2FW39	>sp|Q2FW39|RS9_STAA8 30S ribosomal protein S9 OS=Staphylococcus aureus (strain NCTC 8325) GN=rpsI PE=3 SV=1 UPId=UP000008816 PPId=UP000008816
-0.336493	-0.307047	-0.121915	11	802100000	1.20189	-0.255152	Q2FYZ4	>sp|Q2FYZ4|GLPD_STAA8 Aerobic glycerol-3-phosphate dehydrogenase OS=Staphylococcus aureus (strain NCTC 8325) GN=glpD PE=3 SV=1 UPId=UP000008816 PPId=UP000008816;>sp|Q5HPP0|GLPD_STAEQ Aerobic glycerol-3-phosphate dehydrogenase OS=Staphylococcus epidermidis
0.146867	NaN	-0.655333	3	244860000	0.19358	-0.254233	Q2FXA4	>tr|Q2FXA4|Q2FXA4_STAA8 Ferrochelatase OS=Staphylococcus aureus (strain NCTC 8325) GN=hemH PE=3 SV=1 UPId=UP000008816 PPId=UP000008816
0.00523954	-0.495613	NaN	3	261850000	0.295223	-0.245187	Q2FX98	>tr|Q2FX98|Q2FX98_STAA8 Uncharacterized protein OS=Staphylococcus aureus (strain NCTC 8325) GN=SAOUHSC_01979 PE=4 SV=1 UPId=UP000008816 PPId=UP000008816
-0.408793	0.0938449	-0.411369	5	1003200000	0.543304	-0.242106	Q2FV21	>sp|Q2FV21|PANB_STAA8 3-methyl-2-oxobutanoate hydroxymethyltransferase OS=Staphylococcus aureus (strain NCTC 8325) GN=panB PE=3 SV=2 UPId=UP000008816 PPId=UP000008816
0.0356196	-0.34866	-0.386204	9	2570800000	0.646077	-0.233082	Q2G029	>tr|Q2G029|Q2G029_STAA8 2,3-bisphosphoglycerate-independent phosphoglycerate mutase OS=Staphylococcus aureus (strain NCTC 8325) GN=gpmI PE=1 SV=1 UPId=UP000008816 PPId=UP000008816
-1.07923	0.334471	0.0524827	4	1262300000	0.18934	-0.230759	Q2FXW7	>sp|Q2FXW7|GREA_STAA8 Transcription elongation factor GreA OS=Staphylococcus aureus (strain NCTC 8325) GN=greA PE=3 SV=1 UPId=UP000008816 PPId=UP000008816
NaN	0.335778	-0.796017	2	94426000	0.122557	-0.230119	Q2FZ51	>sp|Q2FZ51|ACP_STAA8 Acyl carrier protein OS=Staphylococcus aureus (strain NCTC 8325) GN=acpP PE=2 SV=1 UPId=UP000008816 PPId=UP000008816
-0.300162	-0.131781	-0.253166	11	4756600000	1.34662	-0.22837	Q2G0Q8	>tr|Q2G0Q8|Q2G0Q8_STAA8 Cysteine synthase OS=Staphylococcus aureus (strain NCTC 8325) GN=SAOUHSC_00488 PE=3 SV=1 UPId=UP000008816 PPId=UP000008816
0.254249	0.038156	-0.941152	15	996050000	0.210355	-0.216249	Q2G2B2	>sp|Q2G2B2|SASG_STAA8 Surface protein G OS=Staphylococcus aureus (strain NCTC 8325) GN=sasG PE=1 SV=1 UPId=UP000008816 PPId=UP000008816;>sp|Q931E9|PLS_STAAM Putative surface protein SAV2496/SAV2497 OS=Staphylococcus aureus (strain Mu50 / ATCC 700699) GN=SA
-0.686656	NaN	0.257958	4	239210000	0.137406	-0.214349	Q2G0K7	>sp|Q2G0K7|HPS_STAA8 3-hexulose-6-phosphate synthase OS=Staphylococcus aureus (strain NCTC 8325) GN=SAOUHSC_00553 PE=3 SV=1 UPId=UP000008816 PPId=UP000008816;>sp|Q5HRH7|HPS_STAEQ 3-hexulose-6-phosphate synthase OS=Staphylococcus epidermidis (strain ATCC 35
-0.414841	0.0435328	-0.265564	7	2363700000	0.591087	-0.212291	Q2FW27	>tr|Q2FW27|Q2FW27_STAA8 Adenylate kinase OS=Staphylococcus aureus (strain NCTC 8325) GN=adk PE=3 SV=1 UPId=UP000008816 PPId=UP000008816
-0.565661	0.484741	-0.552091	6	475140000	0.217637	-0.211003	Q2FXV9	>sp|Q2FXV9|SYA_STAA8 Alanine--tRNA ligase OS=Staphylococcus aureus (strain NCTC 8325) GN=alaS PE=3 SV=1 UPId=UP000008816 PPId=UP000008816
-0.0931654	0.273556	-0.798144	7	1322000000	0.236698	-0.205918	Q2FWD1	>sp|Q2FWD1|PYRG_STAA8 CTP synthase OS=Staphylococcus aureus (strain NCTC 8325) GN=pyrG PE=3 SV=1 UPId=UP000008816 PPId=UP000008816
-0.116003	-0.449995	-0.0508624	10	3115800000	0.623125	-0.20562	Q2G241	>sp|Q2G241|SYE_STAA8 Glutamate--tRNA ligase OS=Staphylococcus aureus (strain NCTC 8325) GN=gltX PE=3 SV=1 UPId=UP000008816 PPId=UP000008816
-0.345992	-0.0594887	NaN	6	312850000	0.407155	-0.20274	Q2FYP2	>tr|Q2FYP2|Q2FYP2_STAA8 ABC transporter, ATP-binding protein, putative OS=Staphylococcus aureus (strain NCTC 8325) GN=SAOUHSC_01392 PE=4 SV=1 UPId=UP000008816 PPId=UP000008816
-0.596612	0.198606	NaN	3	339160000	0.152071	-0.199003	Q2FUS9	>sp|Q2FUS9|Y3022_STAA8 UPF0312 protein SAOUHSC_03022 OS=Staphylococcus aureus (strain NCTC 8325) GN=SAOUHSC_03022 PE=3 SV=1 UPId=UP000008816 PPId=UP000008816
0.0370499	-0.433063	NaN	2	269990000	0.25623	-0.198006	Q2FWD0	>sp|Q2FWD0|RPOE_STAA8 Probable DNA-directed RNA polymerase subunit delta OS=Staphylococcus aureus (strain NCTC 8325) GN=rpoE PE=3 SV=1 UPId=UP000008816 PPId=UP000008816
0.482669	0.214246	-1.27628	4	226490000	0.120432	-0.193123	Q2G1C8	>tr|Q2G1C8|Q2G1C8_STAA8 Uncharacterized protein OS=Staphylococcus aureus (strain NCTC 8325) GN=SAOUHSC_00197 PE=3 SV=1 UPId=UP000008816 PPId=UP000008816
-0.262428	-0.553004	0.236748	7	2006200000	0.308981	-0.192895	Q2FW21	>sp|Q2FW21|RL6_STAA8 50S ribosomal protein L6 OS=Staphylococcus aureus (strain NCTC 8325) GN=rplF PE=1 SV=1 UPId=UP000008816 PPId=UP000008816
-0.309871	-0.816557	0.561079	8	1577900000	0.16395	-0.18845	Q2FWE8	>sp|Q2FWE8|ATPA_STAA8 ATP synthase subunit alpha OS=Staphylococcus aureus (strain NCTC 8325) GN=atpA PE=3 SV=1 UPId=UP000008816 PPId=UP000008816
-0.177184	NaN	-0.194073	4	360380000	1.5385	-0.185628	Q2FXI0	>tr|Q2FXI0|Q2FXI0_STAA8 D-alanine aminotransferase OS=Staphylococcus aureus (strain NCTC 8325) GN=SAOUHSC_01867 PE=3 SV=1 UPId=UP000008816 PPId=UP000008816
-0.072828	NaN	-0.2974	1	42463000	0.459531	-0.185114	G5JMD0	>tr|G5JMD0|G5JMD0_9STAP Uncharacterized protein (Fragment) OS=Staphylococcus simiae CCM 7213 GN=SS7213T_13287 PE=4 SV=1 UPId=UP000005413 PPId=UP000008816;>tr|Q2G2S8|Q2G2S8_STAA8 Uncharacterized protein OS=Staphylococcus aureus (strain NCTC 8325) GN=SAOUHSC
-0.269217	NaN	-0.0929968	3	143950000	0.540217	-0.181107	Q2G0Q9	>sp|Q2G0Q9|HSLO_STAA8 33 kDa chaperonin OS=Staphylococcus aureus (strain NCTC 8325) GN=hslO PE=3 SV=1 UPId=UP000008816 PPId=UP000008816
-0.34097	0.0717943	-0.266099	19	8247100000	0.529995	-0.178425	Q2G0Y7	>sp|Q2G0Y7|IMDH_STAA8 Inosine-5-monophosphate dehydrogenase OS=Staphylococcus aureus (strain NCTC 8325) GN=guaB PE=3 SV=1 UPId=UP000008816 PPId=UP000008816
0.0627789	-0.406876	NaN	3	193210000	0.223692	-0.172049	Q2G0L8	>tr|Q2G0L8|Q2G0L8_STAA8 Uncharacterized protein OS=Staphylococcus aureus (strain NCTC 8325) GN=SAOUHSC_00542 PE=4 SV=1 UPId=UP000008816 PPId=UP000008816
-0.403304	-0.338564	0.252218	13	4800000000	0.28751	-0.163217	Q2FZU6	>tr|Q2FZU6|Q2FZU6_STAA8 Ornithine aminotransferase OS=Staphylococcus aureus (strain NCTC 8325) GN=rocD PE=3 SV=1 UPId=UP000008816 PPId=UP000008816
-0.168555	-0.0315294	-0.275776	4	816450000	0.812536	-0.15862	Q2FXI8	>tr|Q2FXI8|Q2FXI8_STAA8 Uncharacterized protein OS=Staphylococcus aureus (strain NCTC 8325) GN=SAOUHSC_01858 PE=4 SV=1 UPId=UP000008816 PPId=UP000008816
-0.221448	0.252673	-0.506181	9	3383700000	0.26071	-0.158319	Q2FW18	>sp|Q2FW18|RL5_STAA8 50S ribosomal protein L5 OS=Staphylococcus aureus (strain NCTC 8325) GN=rplE PE=1 SV=1 UPId=UP000008816 PPId=UP000008816
-0.179634	0.110357	-0.40211	13	5173600000	0.397319	-0.157129	Q2FYF9	>tr|Q2FYF9|Q2FYF9_STAA8 30S ribosomal protein S1, putative OS=Staphylococcus aureus (strain NCTC 8325) GN=SAOUHSC_01493 PE=4 SV=1 UPId=UP000008816 PPId=UP000008816
-0.292424	-0.237351	0.0694697	10	1755400000	0.514166	-0.153435	Q2FZG6	>tr|Q2FZG6|Q2FZG6_STAA8 Peptide deformylase OS=Staphylococcus aureus (strain NCTC 8325) GN=def PE=3 SV=1 UPId=UP000008816 PPId=UP000008816
-0.262289	-0.043844	NaN	1	290370000	0.403889	-0.153066	Q2FWN4	>sp|Q2FWN4|CH60_STAA8 60 kDa chaperonin OS=Staphylococcus aureus (strain NCTC 8325) GN=groL PE=3 SV=1 UPId=UP000008816 PPId=UP000008816
-0.140185	-0.421552	0.108069	15	10045000000	0.369454	-0.151223	Q2FZU0	>sp|Q2FZU0|G6PI_STAA8 Glucose-6-phosphate isomerase OS=Staphylococcus aureus (strain NCTC 8325) GN=pgi PE=3 SV=1 UPId=UP000008816 PPId=UP000008816
-0.0552713	-0.273632	-0.078796	7	767580000	0.724664	-0.1359	Q2FVL2	>tr|Q2FVL2|Q2FVL2_STAA8 Uncharacterized protein OS=Staphylococcus aureus (strain NCTC 8325) GN=SAOUHSC_02699 PE=4 SV=1 UPId=UP000008816 PPId=UP000008816
-0.320714	0.000197044	-0.0853014	5	485020000	0.531667	-0.135273	Q2G193	>tr|Q2G193|Q2G193_STAA8 Uncharacterized protein OS=Staphylococcus aureus (strain NCTC 8325) GN=SAOUHSC_00253 PE=4 SV=1 UPId=UP000008816 PPId=UP000008816;>tr|A0A0H3K6K1|A0A0H3K6K1_STAAE Uncharacterized protein OS=Staphylococcus aureus (strain Newman) GN=NWM
-0.125192	0.18263	-0.462981	5	650960000	0.264586	-0.135181	Q2FX90	>tr|Q2FX90|Q2FX90_STAA8 Uncharacterized protein OS=Staphylococcus aureus (strain NCTC 8325) GN=SAOUHSC_01987 PE=4 SV=1 UPId=UP000008816 PPId=UP000008816
0.119438	0.133785	-0.657611	20	23585000000	0.18212	-0.134796	Q2G0N0	>sp|Q2G0N0|EFTU_STAA8 Elongation factor Tu OS=Staphylococcus aureus (strain NCTC 8325) GN=tuf PE=3 SV=1 UPId=UP000008816 PPId=UP000008816
-0.901373	0.0754189	0.424214	9	2380700000	0.114731	-0.133913	Q2FXA0	>sp|Q2FXA0|Y1977_STAA8 UPF0342 protein SAOUHSC_01977 OS=Staphylococcus aureus (strain NCTC 8325) GN=SAOUHSC_01977 PE=3 SV=1 UPId=UP000008816 PPId=UP000008816
-0.297828	0.333599	-0.436443	3	1390400000	0.200795	-0.133557	Q2FY42	>tr|Q2FY42|Q2FY42_STAA8 Acetyl-CoA carboxylase, biotin carboxyl carrier protein OS=Staphylococcus aureus (strain NCTC 8325) GN=SAOUHSC_01624 PE=4 SV=1 UPId=UP000008816 PPId=UP000008816
-0.218207	-0.0180393	-0.156165	15	3861300000	0.802506	-0.130804	Q2G2D8	>tr|Q2G2D8|Q2G2D8_STAA8 ABC transporter, substrate-binding protein, putative OS=Staphylococcus aureus (strain NCTC 8325) GN=SAOUHSC_00634 PE=3 SV=1 UPId=UP000008816 PPId=UP000008816;>tr|A0A0U0VP99|A0A0U0VP99_STAHA ABC transporter substrate-binding protein
-0.255201	NaN	0.00194589	3	385410000	0.296834	-0.126627	Q2FXK6	>sp|Q2FXK6|RS4_STAA8 30S ribosomal protein S4 OS=Staphylococcus aureus (strain NCTC 8325) GN=rpsD PE=3 SV=1 UPId=UP000008816 PPId=UP000008816
-0.338462	0.0182194	-0.0382114	5	2376600000	0.405304	-0.119485	Q2FVK8	>sp|Q2FVK8|GPMA_STAA8 2,3-bisphosphoglycerate-dependent phosphoglycerate mutase OS=Staphylococcus aureus (strain NCTC 8325) GN=gpmA PE=3 SV=1 UPId=UP000008816 PPId=UP000008816
0.000806462	-0.334371	-0.012265	9	3879800000	0.394407	-0.115276	Q2FZG4	>tr|Q2FZG4|Q2FZG4_STAA8 Pyruvate dehydrogenase complex, E1 component, alpha subunit, putative OS=Staphylococcus aureus (strain NCTC 8325) GN=SAOUHSC_01040 PE=4 SV=1 UPId=UP000008816 PPId=UP000008816
0.451077	-0.670569	NaN	2	308700000	0.0570124	-0.109746	Q2G0J1	>sp|Q2G0J1|Y573_STAA8 Putative heme-dependent peroxidase SAOUHSC_00573 OS=Staphylococcus aureus (strain NCTC 8325) GN=SAOUHSC_00573 PE=3 SV=1 UPId=UP000008816 PPId=UP000008816
-0.136757	-0.0627074	-0.101299	18	12146000000	1.37055	-0.100254	Q2FXQ6	>sp|Q2FXQ6|TIG_STAA8 Trigger factor OS=Staphylococcus aureus (strain NCTC 8325) GN=tig PE=3 SV=1 UPId=UP000008816 PPId=UP000008816
-0.200678	0.0493155	-0.0938616	6	1560400000	0.424574	-0.0817412	Q2FZT4	>sp|Q2FZT4|Y906_STAA8 Uncharacterized protein SAOUHSC_00906 OS=Staphylococcus aureus (strain NCTC 8325) GN=SAOUHSC_00906 PE=3 SV=1 UPId=UP000008816 PPId=UP000008816
0.704088	-0.854586	NaN	2	215630000	0.0274635	-0.0752491	A0A0H3	>tr|A0A0H3JQG5|A0A0H3JQG5_STAAM Probable autolysin (N-acetylmuramoyl-L-alanine amidase) OS=Staphylococcus aureus (strain Mu50 / ATCC 700699) GN=SAV0465 PE=4 SV=1 UPId=UP000002481 PPId=UP000008816;>sp|Q2G0U9|SLE1_STAA8 N-acetylmuramoyl-L-alanine amidase sle
-0.634122	0.216079	0.197614	10	5312700000	0.0873563	-0.0734763	Q2FV76	>tr|Q2FV76|Q2FV76_STAA8 HMG-CoA synthase, putative OS=Staphylococcus aureus (strain NCTC 8325) GN=SAOUHSC_02860 PE=4 SV=1 UPId=UP000008816 PPId=UP000008816
0.277294	-0.885345	0.388004	11	3352000000	0.0586546	-0.073349	Q2FZ82	>sp|Q2FZ82|SYI_STAA8 Isoleucine--tRNA ligase OS=Staphylococcus aureus (strain NCTC 8325) GN=ileS PE=3 SV=1 UPId=UP000008816 PPId=UP000008816
0.116031	-0.414427	0.100978	5	1714800000	0.129504	-0.0658061	P0C0V7	>sp|P0C0V7|GLMM_STAA8 Phosphoglucosamine mutase OS=Staphylococcus aureus (strain NCTC 8325) GN=glmM PE=1 SV=1 UPId=UP000008816 PPId=UP000008816
-0.921402	0.790686	NaN	3	200990000	0.0215962	-0.0653577	Q2FW96	>sp|Q2FW96|MTLD_STAA8 Mannitol-1-phosphate 5-dehydrogenase OS=Staphylococcus aureus (strain NCTC 8325) GN=mtlD PE=3 SV=1 UPId=UP000008816 PPId=UP000008816
0.055869	NaN	-0.181381	4	219560000	0.161012	-0.0627562	Q2FYF3	>tr|Q2FYF3|Q2FYF3_STAA8 Uncharacterized protein OS=Staphylococcus aureus (strain NCTC 8325) GN=SAOUHSC_01499 PE=4 SV=1 UPId=UP000008816 PPId=UP000008816
-0.242636	0.0519437	0.00535641	7	2996500000	0.24499	-0.0617785	Q2G2P2	>tr|Q2G2P2|Q2G2P2_STAA8 Globin domain protein OS=Staphylococcus aureus (strain NCTC 8325) GN=SAOUHSC_00204 PE=3 SV=1 UPId=UP000008816 PPId=UP000008816
0.380378	0.115166	-0.677392	5	681840000	0.0623225	-0.060616	Q2G1K9	>tr|Q2G1K9|Q2G1K9_STAA8 Aldehyde-alcohol dehydrogenase OS=Staphylococcus aureus (strain NCTC 8325) GN=SAOUHSC_00113 PE=3 SV=1 UPId=UP000008816 PPId=UP000008816
-0.0283236	-0.0371051	-0.100078	6	2551500000	0.87066	-0.0551688	Q2G0Z0	>tr|Q2G0Z0|Q2G0Z0_STAA8 Uncharacterized protein OS=Staphylococcus aureus (strain NCTC 8325) GN=SAOUHSC_00371 PE=4 SV=1 UPId=UP000008816 PPId=UP000008816
0.0520762	-0.361166	0.145173	6	2562900000	0.119746	-0.0546387	Q2G0M7	>sp|Q2G0M7|HCHA_STAA8 Protein deglycase HchA OS=Staphylococcus aureus (strain NCTC 8325) GN=hchA PE=3 SV=1 UPId=UP000008816 PPId=UP000008816;>tr|A0A0U0VQ09|A0A0U0VQ09_STAHA Chaperone protein hchA OS=Staphylococcus haemolyticus GN=hchA PE=4 SV=1 UPId=UP0000
0.157588	0.0476191	-0.316313	15	4802700000	0.0861281	-0.0370352	Q2G2A5	>tr|Q2G2A5|Q2G2A5_STAA8 Pyruvate dehydrogenase complex, E1 component, pyruvate dehydrogenase beta subunit, putative OS=Staphylococcus aureus (strain NCTC 8325) GN=SAOUHSC_01041 PE=4 SV=1 UPId=UP000008816 PPId=UP000008816
-0.0938278	0.218826	-0.217755	4	1498000000	0.0788219	-0.0309189	Q2FZL5	>tr|Q2FZL5|Q2FZL5_STAA8 1,4-dihydroxy-2-naphthoyl-CoA synthase OS=Staphylococcus aureus (strain NCTC 8325) GN=menB PE=3 SV=1 UPId=UP000008816 PPId=UP000008816
-0.0813298	0.0576324	-0.0495411	5	5544100000	0.207519	-0.0244129	Q2G036	>sp|Q2G036|CLPP_STAA8 ATP-dependent Clp protease proteolytic subunit OS=Staphylococcus aureus (strain NCTC 8325) GN=clpP PE=1 SV=1 UPId=UP000008816 PPId=UP000008816
0.100499	-0.265562	0.0934992	14	18698000000	0.0646002	-0.0238547	P0A0B7	>sp|P0A0B7|AHPC_STAA8 Alkyl hydroperoxide reductase subunit C OS=Staphylococcus aureus (strain NCTC 8325) GN=ahpC PE=1 SV=1 UPId=UP000008816 PPId=UP000008816
-0.0105293	-0.25101	0.199071	7	1117700000	0.0518398	-0.0208228	Q2G235	>tr|Q2G235|Q2G235_STAA8 Nicotinate phosphoribosyltransferase OS=Staphylococcus aureus (strain NCTC 8325) GN=SAOUHSC_02133 PE=3 SV=1 UPId=UP000008816 PPId=UP000008816
-0.42528	0.161629	0.204528	10	1131800000	0.0307852	-0.0197078	Q2FY35	>sp|Q2FY35|GCSPB_STAA8 Probable glycine dehydrogenase (decarboxylating) subunit 2 OS=Staphylococcus aureus (strain NCTC 8325) GN=gcvPB PE=3 SV=1 UPId=UP000008816 PPId=UP000008816
-0.07319	0.494944	-0.478167	24	9025600000	0.0209353	-0.0188045	Q2G0L4	>sp|Q2G0L4|SDRD_STAA8 Serine-aspartate repeat-containing protein D OS=Staphylococcus aureus (strain NCTC 8325) GN=sdrD PE=1 SV=1 UPId=UP000008816 PPId=UP000008816
-0.00295678	-0.0871832	0.0418749	25	3339600000	0.147507	-0.0160883	Q2FXM9	>sp|Q2FXM9|KPYK_STAA8 Pyruvate kinase OS=Staphylococcus aureus (strain NCTC 8325) GN=pyk PE=3 SV=1 UPId=UP000008816 PPId=UP000008816
-0.0145322	-0.269692	0.247548	11	1115000000	0.0258556	-0.0122254	Q2FWA0	>tr|Q2FWA0|Q2FWA0_STAA8 Glutamine--fructose-6-phosphate aminotransferase [isomerizing] OS=Staphylococcus aureus (strain NCTC 8325) GN=glmS PE=3 SV=1 UPId=UP000008816 PPId=UP000008816
0.571028	-0.742593	0.142957	3	486560000	0.00763666	-0.00953615	Q2FY16	>sp|Q2FY16|END4_STAA8 Probable endonuclease 4 OS=Staphylococcus aureus (strain NCTC 8325) GN=nfo PE=3 SV=1 UPId=UP000008816 PPId=UP000008816;>tr|G5JGI5|G5JGI5_9STAP Endonuclease IV (Fragment) OS=Staphylococcus simiae CCM 7213 GN=SS7213T_02768 PE=3 SV=1 UPI
-0.434424	0.745875	-0.325533	5	2234700000	0.00384456	-0.00469409	Q2FYL0	>tr|Q2FYL0|Q2FYL0_STAA8 Phosphotransferase system enzyme IIA, putative OS=Staphylococcus aureus (strain NCTC 8325) GN=SAOUHSC_01430 PE=4 SV=1 UPId=UP000008816 PPId=UP000008816
-0.237672	-0.0112724	0.242152	11	2424100000	0.00504638	-0.00226433	O05204	>sp|O05204|AHPF_STAA8 Alkyl hydroperoxide reductase subunit F OS=Staphylococcus aureus (strain NCTC 8325) GN=ahpF PE=3 SV=1 UPId=UP000008816 PPId=UP000008816
0.11169	-0.220298	0.11254	16	4825100000	0.00364747	0.00131061	Q2FY60	>tr|Q2FY60|Q2FY60_STAA8 6-phosphogluconate dehydrogenase, decarboxylating OS=Staphylococcus aureus (strain NCTC 8325) GN=SAOUHSC_01605 PE=3 SV=1 UPId=UP000008816 PPId=UP000008816
-0.361647	0.233651	0.138521	16	10992000000	0.00587427	0.00350829	Q2G2A3	>tr|Q2G2A3|Q2G2A3_STAA8 Dihydrolipoyl dehydrogenase OS=Staphylococcus aureus (strain NCTC 8325) GN=SAOUHSC_01043 PE=4 SV=1 UPId=UP000008816 PPId=UP000008816
-0.465669	0.476136	NaN	2	557800000	0.00308367	0.00523373	Q2G2Y4	>tr|Q2G2Y4|Q2G2Y4_STAA8 Uncharacterized protein OS=Staphylococcus aureus (strain NCTC 8325) GN=SAOUHSC_01918 PE=4 SV=1 UPId=UP000008816 PPId=UP000008816
-0.118339	0.136226	0.0186626	10	5062200000	0.0537053	0.0121832	Q2FZH5	>tr|Q2FZH5|Q2FZH5_STAA8 Phosphoenolpyruvate-protein phosphotransferase OS=Staphylococcus aureus (strain NCTC 8325) GN=SAOUHSC_01029 PE=3 SV=1 UPId=UP000008816 PPId=UP000008816
-0.543562	0.153646	0.426616	6	582680000	0.0131984	0.0122332	Q2FVY0	>tr|Q2FVY0|Q2FVY0_STAA8 Molybdopterin biosynthesis protein moeA, putative OS=Staphylococcus aureus (strain NCTC 8325) GN=SAOUHSC_02542 PE=4 SV=1 UPId=UP000008816 PPId=UP000008816
0.221159	0.11074	-0.288123	3	760540000	0.0299134	0.0145921	Q9F0R1	>sp|Q9F0R1|SARR_STAA8 HTH-type transcriptional regulator SarR OS=Staphylococcus aureus (strain NCTC 8325) GN=sarR PE=1 SV=3 UPId=UP000008816 PPId=UP000008816
0.111379	NaN	-0.0555299	3	116860000	0.0999409	0.0279247	Q2G1Y6	>tr|Q2G1Y6|Q2G1Y6_STAA8 GTP-binding protein TypA, putative OS=Staphylococcus aureus (strain NCTC 8325) GN=SAOUHSC_01058 PE=4 SV=1 UPId=UP000008816 PPId=UP000008816
-0.100361	0.129132	0.0600421	6	2388300000	0.151392	0.0296044	Q2FX94	>tr|Q2FX94|Q2FX94_STAA8 Fumarate hydratase class II OS=Staphylococcus aureus (strain NCTC 8325) GN=fumC PE=3 SV=1 UPId=UP000008816 PPId=UP000008816
0.524303	-0.244518	-0.158603	4	575490000	0.0538593	0.0403941	Q2G1H0	>tr|Q2G1H0|Q2G1H0_STAA8 Indolepyruvate decarboxylase, putative OS=Staphylococcus aureus (strain NCTC 8325) GN=SAOUHSC_00153 PE=3 SV=1 UPId=UP000008816 PPId=UP000008816
0.454417	-0.365144	NaN	4	483060000	0.0310847	0.0446367	Q2FWB5	>tr|Q2FWB5|Q2FWB5_STAA8 Uncharacterized protein OS=Staphylococcus aureus (strain NCTC 8325) GN=SAOUHSC_02383 PE=4 SV=1 UPId=UP000008816 PPId=UP000008816
0.0621484	0.140203	-0.0596185	5	2269400000	0.301751	0.0475777	Q5HLZ8	>sp|Q5HLZ8|RS10_STAEQ 30S ribosomal protein S10 OS=Staphylococcus epidermidis (strain ATCC 35984 / RP62A) GN=rpsJ PE=3 SV=1 UPId=UP000000531 PPId=UP000008816
-0.268377	0.205288	0.208525	4	5642900000	0.103186	0.048479	Q2FW11	>sp|Q2FW11|RL22_STAA8 50S ribosomal protein L22 OS=Staphylococcus aureus (strain NCTC 8325) GN=rplV PE=1 SV=1 UPId=UP000008816 PPId=UP000008816;>sp|Q5HM04|RL22_STAEQ 50S ribosomal protein L22 OS=Staphylococcus epidermidis (strain ATCC 35984 / RP62A) GN=rpl
-0.521429	0.237059	0.435866	6	991090000	0.056268	0.0504984	Q2FW20	>sp|Q2FW20|RS8_STAA8 30S ribosomal protein S8 OS=Staphylococcus aureus (strain NCTC 8325) GN=rpsH PE=3 SV=1 UPId=UP000008816 PPId=UP000008816
-0.422336	0.618904	-0.0430574	9	4622000000	0.054577	0.0511703	Q2FZJ6	>sp|Q2FZJ6|FOLD_STAA8 Bifunctional protein FolD OS=Staphylococcus aureus (strain NCTC 8325) GN=folD PE=3 SV=1 UPId=UP000008816 PPId=UP000008816
0.0198113	-0.00721645	0.148864	3	363460000	0.420227	0.0538197	Q2FY59	>tr|Q2FY59|Q2FY59_STAA8 Peptidase T, putative OS=Staphylococcus aureus (strain NCTC 8325) GN=SAOUHSC_01606 PE=4 SV=1 UPId=UP000008816 PPId=UP000008816
0.121604	0.412274	-0.341313	2	320220000	0.0983011	0.0641881	Q2FYK7	>tr|Q2FYK7|Q2FYK7_STAA8 Uncharacterized protein OS=Staphylococcus aureus (strain NCTC 8325) GN=SAOUHSC_01433 PE=4 SV=1 UPId=UP000008816 PPId=UP000008816;>tr|A0A0T7MUH5|A0A0T7MUH5_STAAU DegV domain-containing protein OS=Staphylococcus aureus GN=ERS179246_01
0.207946	0.115405	-0.106186	10	1335700000	0.285163	0.0723884	Q2FY33	>sp|Q2FY33|GCST_STAA8 Aminomethyltransferase OS=Staphylococcus aureus (strain NCTC 8325) GN=gcvT PE=3 SV=1 UPId=UP000008816 PPId=UP000008816
0.0914546	0.250191	-0.109618	5	1585300000	0.271689	0.0773423	Q2FWV3	>tr|Q2FWV3|Q2FWV3_STAA8 Staphylokinase, putative OS=Staphylococcus aureus (strain NCTC 8325) GN=SAOUHSC_02171 PE=4 SV=1 UPId=UP000008816 PPId=UP000008816
0.389765	-0.25917	0.101725	14	5963200000	0.142682	0.0774396	Q2FYY6	>tr|Q2FYY6|Q2FYY6_STAA8 Glutamine synthetase OS=Staphylococcus aureus (strain NCTC 8325) GN=SAOUHSC_01287 PE=3 SV=1 UPId=UP000008816 PPId=UP000008816;>sp|Q5HPN2|GLNA_STAEQ Glutamine synthetase OS=Staphylococcus epidermidis (strain ATCC 35984 / RP62A) GN=gl
0.0663384	0.181701	-0.0113417	8	3807200000	0.530585	0.0788991	Q2FZP9	>sp|Q2FZP9|Y951_STAA8 Putative phosphoesterase SAOUHSC_00951 OS=Staphylococcus aureus (strain NCTC 8325) GN=SAOUHSC_00951 PE=3 SV=1 UPId=UP000008816 PPId=UP000008816
0.174059	0.400861	-0.330423	2	657340000	0.129391	0.0814985	Q2G000	>tr|Q2G000|Q2G000_STAA8 Thioredoxin, putative OS=Staphylococcus aureus (strain NCTC 8325) GN=SAOUHSC_00834 PE=1 SV=1 UPId=UP000008816 PPId=UP000008816
-0.00885198	-0.1655	0.427988	7	606390000	0.166894	0.0845453	Q2G295	>tr|Q2G295|Q2G295_STAA8 Catabolite control protein A OS=Staphylococcus aureus (strain NCTC 8325) GN=SAOUHSC_01850 PE=4 SV=1 UPId=UP000008816 PPId=UP000008816
-0.132763	0.343171	0.0498335	2	948380000	0.225222	0.0867471	Q2FXM0	>sp|Q2FXM0|Y1815_STAA8 UPF0173 metal-dependent hydrolase SAOUHSC_01815 OS=Staphylococcus aureus (strain NCTC 8325) GN=SAOUHSC_01815 PE=3 SV=1 UPId=UP000008816 PPId=UP000008816
-0.104248	0.0152542	0.354246	5	777860000	0.232377	0.0884175	Q2G248	>tr|Q2G248|Q2G248_STAA8 Uncharacterized protein OS=Staphylococcus aureus (strain NCTC 8325) GN=SAOUHSC_01852 PE=4 SV=1 UPId=UP000008816 PPId=UP000008816
0.205839	0.0223743	0.0784987	16	8181900000	0.698326	0.102237	Q2FYT8	>tr|Q2FYT8|Q2FYT8_STAA8 Transketolase OS=Staphylococcus aureus (strain NCTC 8325) GN=SAOUHSC_01337 PE=3 SV=1 UPId=UP000008816 PPId=UP000008816
0.0191723	0.00908798	0.284396	14	9973800000	0.435289	0.104219	Q2FZ36	>tr|Q2FZ36|Q2FZ36_STAA8 Succinyl-CoA ligase [ADP-forming] subunit alpha OS=Staphylococcus aureus (strain NCTC 8325) GN=SAOUHSC_01218 PE=3 SV=1 UPId=UP000008816 PPId=UP000008816
0.107342	NaN	0.116263	4	413220000	1.59545	0.111803	O34090	>sp|O34090|HEM3_STAA8 Porphobilinogen deaminase OS=Staphylococcus aureus (strain NCTC 8325) GN=hemC PE=3 SV=1 UPId=UP000008816 PPId=UP000008816
-0.0244974	0.224082	0.141109	4	441840000	0.584419	0.113565	A0A0U0	>tr|A0A0U0VKA9|A0A0U0VKA9_STAHA Dihydrolipoamide succinyltransferase E2 component of 2-oxoglutarate dehydrogenase complex OS=Staphylococcus haemolyticus GN=odhB PE=3 SV=1 UPId=UP000046272 PPId=UP000008816;>sp|Q2FYM2|ODO2_STAA8 Dihydrolipoyllysine-residue s
-0.173206	0.23774	0.300738	27	67802000000	0.302176	0.121757	Q2G1X0	>sp|Q2G1X0|HLA_STAA8 Alpha-hemolysin OS=Staphylococcus aureus (strain NCTC 8325) GN=hly PE=1 SV=1 UPId=UP000008816 PPId=UP000008816
0.431239	0.168884	-0.22442	2	542660000	0.237684	0.125234	Q2FWF5	>sp|Q2FWF5|FABZ_STAA8 3-hydroxyacyl-[acyl-carrier-protein] dehydratase FabZ OS=Staphylococcus aureus (strain NCTC 8325) GN=fabZ PE=3 SV=1 UPId=UP000008816 PPId=UP000008816
0.116341	0.194218	0.0754914	9	2947200000	1.18005	0.128683	Q2FZ54	>tr|Q2FZ54|Q2FZ54_STAA8 Malonyl CoA-acyl carrier protein transacylase OS=Staphylococcus aureus (strain NCTC 8325) GN=SAOUHSC_01198 PE=3 SV=1 UPId=UP000008816 PPId=UP000008816
-0.0513139	0.338607	0.114774	2	254410000	0.446948	0.134022	Q2FVT6	>sp|Q2FVT6|HUTI_STAA8 Imidazolonepropionase OS=Staphylococcus aureus (strain NCTC 8325) GN=hutI PE=3 SV=1 UPId=UP000008816 PPId=UP000008816
0.632352	NaN	-0.356275	3	286650000	0.0826847	0.138039	Q2G253	>tr|Q2G253|Q2G253_STAA8 Uncharacterized protein OS=Staphylococcus aureus (strain NCTC 8325) GN=SAOUHSC_00025 PE=3 SV=1 UPId=UP000008816 PPId=UP000008816
-0.409342	0.952024	-0.127146	9	4194300000	0.113387	0.138512	Q2FZ25	>sp|Q2FZ25|RS2_STAA8 30S ribosomal protein S2 OS=Staphylococcus aureus (strain NCTC 8325) GN=rpsB PE=3 SV=2 UPId=UP000008816 PPId=UP000008816
0.235213	0.0666765	NaN	2	472750000	0.489255	0.150945	Q2G1B9	>tr|Q2G1B9|Q2G1B9_STAA8 Uncharacterized protein OS=Staphylococcus aureus (strain NCTC 8325) GN=SAOUHSC_00226 PE=4 SV=1 UPId=UP000008816 PPId=UP000008816;>tr|Q2G1C4|Q2G1C4_STAA8 Alcohol dehydrogenase, zinc-containing OS=Staphylococcus aureus (strain NCTC 83
0.0439063	-0.0344557	0.509405	7	1067800000	0.381495	0.172952	Q2FW91	>tr|Q2FW91|Q2FW91_STAA8 Arginase OS=Staphylococcus aureus (strain NCTC 8325) GN=SAOUHSC_02409 PE=3 SV=1 UPId=UP000008816 PPId=UP000008816
0.331285	0.147524	0.0452879	18	10889000000	0.764355	0.174699	Q2G0N1	>sp|Q2G0N1|EFG_STAA8 Elongation factor G OS=Staphylococcus aureus (strain NCTC 8325) GN=fusA PE=1 SV=3 UPId=UP000008816 PPId=UP000008816
0.0733195	0.305092	0.14665	12	5364100000	0.903914	0.175021	Q2FZ37	>sp|Q2FZ37|SUCC_STAA8 Succinyl-CoA ligase [ADP-forming] subunit beta OS=Staphylococcus aureus (strain NCTC 8325) GN=sucC PE=3 SV=1 UPId=UP000008816 PPId=UP000008816
0.486251	-0.129845	NaN	1	829250000	0.176446	0.178203	Q2G2Q1	>sp|Q2G2Q1|RS15_STAA8 30S ribosomal protein S15 OS=Staphylococcus aureus (strain NCTC 8325) GN=rpsO PE=3 SV=1 UPId=UP000008816 PPId=UP000008816
0.233422	0.00818787	0.314539	6	1608800000	0.743726	0.185383	Q2FXM1	>tr|Q2FXM1|Q2FXM1_STAA8 Uncharacterized protein OS=Staphylococcus aureus (strain NCTC 8325) GN=SAOUHSC_01814 PE=3 SV=1 UPId=UP000008816 PPId=UP000008816
0.171015	0.208967	0.189228	12	3727000000	2.47894	0.189737	Q2FXH9	>sp|Q2FXH9|PEPVL_STAA8 Putative dipeptidase SAOUHSC_01868 OS=Staphylococcus aureus (strain NCTC 8325) GN=SAOUHSC_01868 PE=3 SV=1 UPId=UP000008816 PPId=UP000008816
0.277882	0.244992	0.077371	5	1022300000	1.07422	0.200082	Q2FW66	>sp|Q2FW66|ASP23_STAA8 Alkaline shock protein 23 OS=Staphylococcus aureus (strain NCTC 8325) GN=asp23 PE=3 SV=1 UPId=UP000008816 PPId=UP000008816
0.388344	-0.0513458	0.264764	2	716470000	0.576455	0.200587	Q2FW16	>sp|Q2FW16|RL14_STAA8 50S ribosomal protein L14 OS=Staphylococcus aureus (strain NCTC 8325) GN=rplN PE=1 SV=1 UPId=UP000008816 PPId=UP000008816
-0.147792	0.389817	0.360533	6	1735900000	0.43319	0.200853	Q2G2F3	>sp|Q2G2F3|TRAP_STAA8 Signal transduction protein TRAP OS=Staphylococcus aureus (strain NCTC 8325) GN=traP PE=1 SV=1 UPId=UP000008816 PPId=UP000008816
0.0240261	0.378509	NaN	2	255680000	0.337578	0.201268	Q2G270	>tr|Q2G270|Q2G270_STAA8 Uncharacterized protein OS=Staphylococcus aureus (strain NCTC 8325) GN=SAOUHSC_02568 PE=4 SV=1 UPId=UP000008816 PPId=UP000008816
0.412404	NaN	-0.00146745	2	148450000	0.299067	0.205468	Q2G1A9	>tr|Q2G1A9|Q2G1A9_STAA8 6-phospho-beta-glucosidase, putative OS=Staphylococcus aureus (strain NCTC 8325) GN=SAOUHSC_00236 PE=3 SV=1 UPId=UP000008816 PPId=UP000008816;>tr|G5JF56|G5JF56_9STAP 6-phospho-beta-glucosidase OS=Staphylococcus simiae CCM 7213 GN=SS
0.213959	0.058881	0.347598	5	1751300000	0.881433	0.206813	Q2FWX1	>tr|Q2FWX1|Q2FWX1_STAA8 Uncharacterized protein OS=Staphylococcus aureus (strain NCTC 8325) GN=SAOUHSC_02150 PE=4 SV=1 UPId=UP000008816 PPId=UP000008816
0.00633071	0.613875	0.00922301	13	3814700000	0.389212	0.20981	Q2FXE8	>tr|Q2FXE8|Q2FXE8_STAA8 Transaldolase OS=Staphylococcus aureus (strain NCTC 8325) GN=SAOUHSC_01901 PE=4 SV=1 UPId=UP000008816 PPId=UP000008816
-0.0629054	0.489235	NaN	1	76947000	0.235518	0.213165	Q2FZ29	>sp|Q2FZ29|HSLV_STAA8 ATP-dependent protease subunit HslV OS=Staphylococcus aureus (strain NCTC 8325) GN=hslV PE=3 SV=1 UPId=UP000008816 PPId=UP000008816
0.518039	-0.136641	0.277982	2	462280000	0.432651	0.219793	Q2FWE0	>sp|Q2FWE0|RF1_STAA8 Peptide chain release factor 1 OS=Staphylococcus aureus (strain NCTC 8325) GN=prfA PE=3 SV=1 UPId=UP000008816 PPId=UP000008816;>tr|A0A0U0VSM8|A0A0U0VSM8_STAHA Peptide chain release factor 1 OS=Staphylococcus haemolyticus GN=prfA PE=4 S
0.307759	0.131982	NaN	4	653470000	0.616024	0.219871	Q2G1N4	>tr|Q2G1N4|Q2G1N4_STAA8 Periplasmic binding protein, putative OS=Staphylococcus aureus (strain NCTC 8325) GN=SAOUHSC_00074 PE=4 SV=1 UPId=UP000008816 PPId=UP000008816
0.218161	0.471205	-0.0240966	4	2171600000	0.583197	0.221757	Q2FZZ9	>tr|Q2FZZ9|Q2FZZ9_STAA8 Uncharacterized protein OS=Staphylococcus aureus (strain NCTC 8325) GN=SAOUHSC_00835 PE=3 SV=1 UPId=UP000008816 PPId=UP000008816
-0.183313	1.49221	-0.619931	4	497710000	0.121822	0.229654	Q2FZ19	>sp|Q2FZ19|RNJ2_STAA8 Ribonuclease J 2 OS=Staphylococcus aureus (strain NCTC 8325) GN=rnj2 PE=1 SV=2 UPId=UP000008816 PPId=UP000008816
0.368677	0.089862	0.232781	10	2880200000	0.985345	0.23044	Q2FZW6	>sp|Q2FZW6|DLTA_STAA8 D-alanine--poly(phosphoribitol) ligase subunit 1 OS=Staphylococcus aureus (strain NCTC 8325) GN=dltA PE=3 SV=1 UPId=UP000008816 PPId=UP000008816
0.507935	0.205749	-0.0125345	5	965010000	0.582489	0.233716	Q2FWZ0	>sp|Q2FWZ0|GATB_STAA8 Aspartyl/glutamyl-tRNA(Asn/Gln) amidotransferase subunit B OS=Staphylococcus aureus (strain NCTC 8325) GN=gatB PE=3 SV=1 UPId=UP000008816 PPId=UP000008816
0.12315	0.403401	0.187768	12	5710700000	0.971721	0.238106	Q2G0M8	>tr|Q2G0M8|Q2G0M8_STAA8 Uncharacterized protein OS=Staphylococcus aureus (strain NCTC 8325) GN=SAOUHSC_00532 PE=3 SV=1 UPId=UP000008816 PPId=UP000008816
0.584403	0.466882	-0.322861	4	766160000	0.31534	0.242808	Q2FYS0	>tr|Q2FYS0|Q2FYS0_STAA8 Uncharacterized protein OS=Staphylococcus aureus (strain NCTC 8325) GN=SAOUHSC_01365 PE=4 SV=1 UPId=UP000008816 PPId=UP000008816
0.400538	0.408898	-0.0505904	8	2135700000	0.624248	0.252949	Q2G041	>tr|Q2G041|Q2G041_STAA8 Thioredoxin reductase OS=Staphylococcus aureus (strain NCTC 8325) GN=SAOUHSC_00785 PE=3 SV=1 UPId=UP000008816 PPId=UP000008816
1.27403	-0.937999	0.433812	2	241040000	0.137236	0.256615	Q2FY29	>tr|Q2FY29|Q2FY29_STAA8 Uncharacterized protein OS=Staphylococcus aureus (strain NCTC 8325) GN=SAOUHSC_01644 PE=4 SV=1 UPId=UP000008816 PPId=UP000008816
0.198603	0.211263	0.364021	16	6452900000	1.39866	0.257963	Q2G296	>sp|Q2G296|FTHS_STAA8 Formate--tetrahydrofolate ligase OS=Staphylococcus aureus (strain NCTC 8325) GN=fhs PE=3 SV=1 UPId=UP000008816 PPId=UP000008816
0.0296371	-0.25355	1.00775	14	30663000000	0.248197	0.261279	P02976	>sp|P02976|SPA_STAA8 Immunoglobulin G-binding protein A OS=Staphylococcus aureus (strain NCTC 8325) GN=spa PE=1 SV=3 UPId=UP000008816 PPId=UP000008816;>tr|A0A0T7MX33|A0A0T7MX33_STAAU Protein A OS=Staphylococcus aureus GN=spa PE=4 SV=1 UPId=UP000048318 PPId
-0.00579029	0.260105	0.537496	16	9228900000	0.629958	0.263937	Q2FV67	>sp|Q2FV67|ROCA_STAA8 1-pyrroline-5-carboxylate dehydrogenase OS=Staphylococcus aureus (strain NCTC 8325) GN=rocA PE=3 SV=1 UPId=UP000008816 PPId=UP000008816
-0.256526	1.66709	-0.610737	3	110640000	0.129256	0.266607	Q2G0B1	>sp|Q2G0B1|MGRA_STAA8 HTH-type transcriptional regulator MgrA OS=Staphylococcus aureus (strain NCTC 8325) GN=mgrA PE=1 SV=3 UPId=UP000008816 PPId=UP000008816
0.647041	0.0919871	0.0833803	9	9080700000	0.553902	0.274136	Q2FXL6	>sp|Q2FXL6|Y1819_STAA8 Putative universal stress protein SAOUHSC_01819 OS=Staphylococcus aureus (strain NCTC 8325) GN=SAOUHSC_01819 PE=3 SV=1 UPId=UP000008816 PPId=UP000008816
0.0710256	0.445564	0.338834	12	1756400000	0.904067	0.285141	Q2FXL7	>sp|Q2FXL7|DHA2_STAA8 Alanine dehydrogenase 2 OS=Staphylococcus aureus (strain NCTC 8325) GN=ald2 PE=3 SV=1 UPId=UP000008816 PPId=UP000008816;>tr|A0A0U0VSF6|A0A0U0VSF6_STAHA Alanine dehydrogenase OS=Staphylococcus haemolyticus GN=ald2 PE=4 SV=1 UPId=UP0000
0.58387	-0.00407233	NaN	2	405800000	0.29719	0.289899	Q2FXI5	>tr|Q2FXI5|Q2FXI5_STAA8 Uncharacterized protein OS=Staphylococcus aureus (strain NCTC 8325) GN=SAOUHSC_01861 PE=4 SV=1 UPId=UP000008816 PPId=UP000008816
0.263132	0.0974842	0.529491	11	2070900000	0.846417	0.296702	Q2FVW9	>tr|Q2FVW9|Q2FVW9_STAA8 Uncharacterized protein OS=Staphylococcus aureus (strain NCTC 8325) GN=SAOUHSC_02554 PE=1 SV=1 UPId=UP000008816 PPId=UP000008816
0.131487	-0.0227723	0.785171	7	1058400000	0.453455	0.297962	O52582	>sp|O52582|CDR_STAA8 Coenzyme A disulfide reductase OS=Staphylococcus aureus (strain NCTC 8325) GN=cdr PE=1 SV=3 UPId=UP000008816 PPId=UP000008816
0.303383	0.28315	0.391122	3	336720000	1.99217	0.325885	Q2FZ75	>sp|Q2FZ75|PYRB_STAA8 Aspartate carbamoyltransferase OS=Staphylococcus aureus (strain NCTC 8325) GN=pyrB PE=3 SV=1 UPId=UP000008816 PPId=UP000008816
0.315039	0.0103625	0.695764	12	4283700000	0.641789	0.340389	Q2G1J0	>sp|Q2G1J0|ALDA_STAA8 Putative aldehyde dehydrogenase AldA OS=Staphylococcus aureus (strain NCTC 8325) GN=aldA PE=3 SV=1 UPId=UP000008816 PPId=UP000008816
0.208548	-0.156958	0.994471	7	710470000	0.384477	0.348687	Q2FVT5	>tr|Q2FVT5|Q2FVT5_STAA8 Urocanate hydratase OS=Staphylococcus aureus (strain NCTC 8325) GN=hutU PE=3 SV=1 UPId=UP000008816 PPId=UP000008816
0.460255	0.447435	0.145543	10	4194700000	1.11846	0.351077	Q2G1W2	>sp|Q2G1W2|PCKA_STAA8 Phosphoenolpyruvate carboxykinase [ATP] OS=Staphylococcus aureus (strain NCTC 8325) GN=pckA PE=3 SV=1 UPId=UP000008816 PPId=UP000008816
0.674915	0.607087	-0.227676	4	140640000	0.45644	0.351442	A0A0T7	>tr|A0A0T7M8V7|A0A0T7M8V7_STAAU Smooth muscle caldesmon OS=Staphylococcus aureus GN=ERS093009_02402 PE=4 SV=1 UPId=UP000047221 PPId=UP000008816;>tr|Q2G245|Q2G245_STAA8 Uncharacterized protein OS=Staphylococcus aureus (strain NCTC 8325) GN=SAOUHSC_01854 PE=
0.207043	0.351622	0.517787	15	5405700000	1.24204	0.358817	Q2FZU5	>tr|Q2FZU5|Q2FZU5_STAA8 Glutamate dehydrogenase OS=Staphylococcus aureus (strain NCTC 8325) GN=SAOUHSC_00895 PE=3 SV=1 UPId=UP000008816 PPId=UP000008816
0.461643	-0.430383	1.04848	6	1024800000	0.309266	0.359912	Q2FYM1	>sp|Q2FYM1|ODO1_STAA8 2-oxoglutarate dehydrogenase E1 component OS=Staphylococcus aureus (strain NCTC 8325) GN=odhA PE=3 SV=1 UPId=UP000008816 PPId=UP000008816
0.118199	0.395558	0.566704	2	178780000	0.95745	0.360154	Q2FXI9	>tr|Q2FXI9|Q2FXI9_STAA8 Uncharacterized protein OS=Staphylococcus aureus (strain NCTC 8325) GN=SAOUHSC_01857 PE=3 SV=1 UPId=UP000008816 PPId=UP000008816;>tr|A0A0U0VIK1|A0A0U0VIK1_STAHA SpoIIIE family cell division protein OS=Staphylococcus haemolyticus GN=
NaN	1.11297	-0.370196	2	260300000	0.152166	0.371388	Q2FXG2	>sp|Q2FXG2|RISB_STAA8 6,7-dimethyl-8-ribityllumazine synthase OS=Staphylococcus aureus (strain NCTC 8325) GN=ribH PE=3 SV=1 UPId=UP000008816 PPId=UP000008816
0.669724	0.508547	-0.0031946	4	1107900000	0.713912	0.391692	Q2FZS0	>sp|Q2FZS0|FABH_STAA8 3-oxoacyl-[acyl-carrier-protein] synthase 3 OS=Staphylococcus aureus (strain NCTC 8325) GN=fabH PE=3 SV=1 UPId=UP000008816 PPId=UP000008816
0.0663068	0.722129	NaN	3	401050000	0.354865	0.394218	Q2FWJ3	>sp|Q2FWJ3|RSBW_STAA8 Serine-protein kinase RsbW OS=Staphylococcus aureus (strain NCTC 8325) GN=rsbW PE=3 SV=2 UPId=UP000008816 PPId=UP000008816
1.81472	-0.189707	-0.438207	5	169390000	0.197329	0.395601	Q2G019	>tr|Q2G019|Q2G019_STAA8 Uncharacterized protein OS=Staphylococcus aureus (strain NCTC 8325) GN=SAOUHSC_00808 PE=1 SV=1 UPId=UP000008816 PPId=UP000008816;>tr|A0A077ULC8|A0A077ULC8_STAAU Putative lipoprotein OS=Staphylococcus aureus GN=ERS140147_02559 PE=4 S
0.117889	0.623152	0.458043	16	5698100000	0.939019	0.399695	Q2G1U3	>tr|Q2G1U3|Q2G1U3_STAA8 Oligoendopeptidase F OS=Staphylococcus aureus (strain NCTC 8325) GN=SAOUHSC_00937 PE=4 SV=1 UPId=UP000008816 PPId=UP000008816
0.437679	0.602811	0.191418	2	3516500000	1.12331	0.410636	Q2G1W1	>tr|Q2G1W1|Q2G1W1_STAA8 Secretory antigen SsaA, putative OS=Staphylococcus aureus (strain NCTC 8325) GN=SAOUHSC_02576 PE=4 SV=1 UPId=UP000008816 PPId=UP000008816
0.127167	0.571673	0.562403	6	1732200000	0.986389	0.420414	Q2FZ55	>sp|Q2FZ55|PLSX_STAA8 Phosphate acyltransferase OS=Staphylococcus aureus (strain NCTC 8325) GN=plsX PE=3 SV=1 UPId=UP000008816 PPId=UP000008816
NaN	0.608447	0.244671	2	143310000	0.590748	0.426559	Q2FXZ9	>sp|Q2FXZ9|Y1676_STAA8 UPF0365 protein SAOUHSC_01676 OS=Staphylococcus aureus (strain NCTC 8325) GN=SAOUHSC_01676 PE=3 SV=1 UPId=UP000008816 PPId=UP000008816
0.274938	0.513401	0.572321	6	538360000	1.42126	0.453553	Q2FZV7	>sp|Q2FZV7|Y878_STAA8 NADH dehydrogenase-like protein SAOUHSC_00878 OS=Staphylococcus aureus (strain NCTC 8325) GN=SAOUHSC_00878 PE=1 SV=1 UPId=UP000008816 PPId=UP000008816
-0.772771	NaN	1.68039	2	379410000	0.111031	0.453807	P0C818	>sp|P0C818|PSMA4_STAA8 Phenol-soluble modulin alpha 4 peptide OS=Staphylococcus aureus (strain NCTC 8325) GN=psmA4 PE=3 SV=1 UPId=UP000008816 PPId=UP000008816
0.993077	0.0734005	0.313125	16	4228600000	0.625342	0.459868	Q2G1C9	>tr|Q2G1C9|Q2G1C9_STAA8 Uncharacterized protein OS=Staphylococcus aureus (strain NCTC 8325) GN=SAOUHSC_00196 PE=3 SV=1 UPId=UP000008816 PPId=UP000008816
0.0279804	0.637958	0.714895	5	1209500000	0.773877	0.460278	Q2G2U9	>sp|Q2G2U9|SARA_STAA8 Transcriptional regulator SarA OS=Staphylococcus aureus (strain NCTC 8325) GN=sarA PE=1 SV=3 UPId=UP000008816 PPId=UP000008816
0.335622	0.664264	0.38315	6	1310800000	1.33643	0.461012	Q2FY34	>sp|Q2FY34|GCSPA_STAA8 Probable glycine dehydrogenase (decarboxylating) subunit 1 OS=Staphylococcus aureus (strain NCTC 8325) GN=gcvPA PE=3 SV=1 UPId=UP000008816 PPId=UP000008816
1.27682	-0.329607	NaN	3	495150000	0.17991	0.473605	Q2FY27	>tr|Q2FY27|Q2FY27_STAA8 Glucokinase, putative OS=Staphylococcus aureus (strain NCTC 8325) GN=SAOUHSC_01646 PE=4 SV=1 UPId=UP000008816 PPId=UP000008816
0.337066	NaN	0.671714	2	992130000	0.690547	0.50439	Q2FZU7	>tr|Q2FZU7|Q2FZU7_STAA8 FMN oxidoreductase, putative OS=Staphylococcus aureus (strain NCTC 8325) GN=SAOUHSC_00893 PE=4 SV=1 UPId=UP000008816 PPId=UP000008816
0.925081	0.840657	-0.194073	9	1418000000	0.548723	0.523888	Q2G2R8	>sp|Q2G2R8|SSPP_STAA8 Staphopain A OS=Staphylococcus aureus (strain NCTC 8325) GN=sspP PE=1 SV=1 UPId=UP000008816 PPId=UP000008816
0.907067	0.804485	-0.139419	6	317020000	0.591323	0.524044	Q2FYZ5	>sp|Q2FYZ5|GLPK_STAA8 Glycerol kinase OS=Staphylococcus aureus (strain NCTC 8325) GN=glpK PE=3 SV=1 UPId=UP000008816 PPId=UP000008816;>tr|L7WX73|L7WX73_STAWS Glycerol kinase OS=Staphylococcus warneri (strain SG1) GN=glpK PE=3 SV=1 UPId=UP000011217 PPId=UP0
0.798502	0.265719	0.574302	5	750530000	1.14575	0.546174	Q2FXS6	>tr|Q2FXS6|Q2FXS6_STAA8 Cell shape-determining protein MreC OS=Staphylococcus aureus (strain NCTC 8325) GN=SAOUHSC_01759 PE=3 SV=1 UPId=UP000008816 PPId=UP000008816
0.754306	0.351406	0.555114	10	3867000000	1.38283	0.553609	Q2FVK2	>sp|Q2FVK2|HLGC_STAA8 Gamma-hemolysin component C OS=Staphylococcus aureus (strain NCTC 8325) GN=hlgC PE=1 SV=1 UPId=UP000008816 PPId=UP000008816
0.370392	0.573447	0.720934	17	2937100000	1.49575	0.554924	Q2FYS9	>tr|Q2FYS9|Q2FYS9_STAA8 Aconitate hydratase OS=Staphylococcus aureus (strain NCTC 8325) GN=SAOUHSC_01347 PE=3 SV=1 UPId=UP000008816 PPId=UP000008816
-0.930902	1.01269	1.58511	3	1618200000	0.266444	0.555631	P0C7Y1	>sp|P0C7Y1|PSMA1_STAA8 Phenol-soluble modulin alpha 1 peptide OS=Staphylococcus aureus (strain NCTC 8325) GN=psmA1 PE=3 SV=1 UPId=UP000008816 PPId=UP000008816;>sp|P0C7Z3|PSMA2_STAA8 Phenol-soluble modulin alpha 2 peptide OS=Staphylococcus aureus (strain NC
0.571564	1.59282	-0.423136	2	192050000	0.372961	0.580415	Q2FZ94	>tr|Q2FZ94|Q2FZ94_STAA8 Penicillin-binding protein 1 OS=Staphylococcus aureus (strain NCTC 8325) GN=SAOUHSC_01145 PE=4 SV=1 UPId=UP000008816 PPId=UP000008816;>tr|A0A0U0VSY8|A0A0U0VSY8_STAHA Cell division protein FtsI (Peptidoglycan synthetase) OS=Staphyloc
0.515038	0.601059	0.648483	16	15188000000	2.35853	0.588194	Q2FVK1	>sp|Q2FVK1|HLGB_STAA8 Gamma-hemolysin component B OS=Staphylococcus aureus (strain NCTC 8325) GN=hlgB PE=1 SV=1 UPId=UP000008816 PPId=UP000008816
0.360947	0.508344	0.89687	7	5601300000	1.17749	0.58872	Q2FWZ8	>sp|Q2FWZ8|FTN_STAA8 Bacterial non-heme ferritin OS=Staphylococcus aureus (strain NCTC 8325) GN=ftnA PE=1 SV=1 UPId=UP000008816 PPId=UP000008816
0.100499	1.58448	0.106204	5	1561700000	0.455817	0.597059	Q2FWB8	>tr|Q2FWB8|Q2FWB8_STAA8 Purine nucleoside phosphorylase DeoD-type OS=Staphylococcus aureus (strain NCTC 8325) GN=deoD PE=3 SV=1 UPId=UP000008816 PPId=UP000008816
0.85117	0.352271	0.610429	8	2497700000	1.28113	0.604623	Q2FXL3	>tr|Q2FXL3|Q2FXL3_STAA8 Probable thiol peroxidase OS=Staphylococcus aureus (strain NCTC 8325) GN=tpx PE=1 SV=1 UPId=UP000008816 PPId=UP000008816
0.840608	1.1258	-0.148939	3	415940000	0.589525	0.605823	Q2G1M1	>tr|Q2G1M1|Q2G1M1_STAA8 3-ketoacyl-acyl carrier protein reductase, putative OS=Staphylococcus aureus (strain NCTC 8325) GN=SAOUHSC_00086 PE=4 SV=1 UPId=UP000008816 PPId=UP000008816
0.854111	0.571082	0.418718	5	3187300000	1.39282	0.614637	Q2FZE9	>sp|Q2FZE9|ISDA_STAA8 Iron-regulated surface determinant protein A OS=Staphylococcus aureus (strain NCTC 8325) GN=isdA PE=1 SV=1 UPId=UP000008816 PPId=UP000008816
0.290219	0.513805	1.16755	4	933640000	0.886446	0.657191	Q2FWB7	>tr|Q2FWB7|Q2FWB7_STAA8 Uncharacterized protein OS=Staphylococcus aureus (strain NCTC 8325) GN=SAOUHSC_02381 PE=3 SV=1 UPId=UP000008816 PPId=UP000008816
0.223256	0.948832	0.802617	6	582380000	1.01291	0.658235	Q2G2D0	>sp|Q2G2D0|IF2_STAA8 Translation initiation factor IF-2 OS=Staphylococcus aureus (strain NCTC 8325) GN=infB PE=3 SV=1 UPId=UP000008816 PPId=UP000008816
0.61125	0.262801	1.1155	7	745210000	0.936921	0.663183	Q2G0W9	>sp|Q2G0W9|Y405_STAA8 Uncharacterized lipoprotein SAOUHSC_00405 OS=Staphylococcus aureus (strain NCTC 8325) GN=SAOUHSC_00405 PE=3 SV=2 UPId=UP000008816 PPId=UP000008816
0.562168	0.766118	NaN	2	120830000	1.01327	0.664143	Q2FYK5	>sp|Q2FYK5|TYSY_STAA8 Thymidylate synthase OS=Staphylococcus aureus (strain NCTC 8325) GN=thyA PE=3 SV=1 UPId=UP000008816 PPId=UP000008816
0.982042	0.220884	1.05022	10	4092600000	0.975682	0.75105	Q2FYU7	>sp|Q2FYU7|CATA_STAA8 Catalase OS=Staphylococcus aureus (strain NCTC 8325) GN=katA PE=2 SV=2 UPId=UP000008816 PPId=UP000008816
1.76342	0.536522	-0.0440661	2	165180000	0.532243	0.751959	Q2FW93	>tr|Q2FW93|Q2FW93_STAA8 Uncharacterized protein OS=Staphylococcus aureus (strain NCTC 8325) GN=SAOUHSC_02406 PE=4 SV=1 UPId=UP000008816 PPId=UP000008816
NaN	0.497386	1.04293	2	499060000	0.66414	0.77016	Q2FXR3	>sp|Q2FXR3|HEM2_STAA8 Delta-aminolevulinic acid dehydratase OS=Staphylococcus aureus (strain NCTC 8325) GN=hemB PE=3 SV=1 UPId=UP000008816 PPId=UP000008816
0.878757	0.968753	0.476708	6	3370300000	1.44285	0.774739	Q2G260	>sp|Q2G260|Y094_STAA8 Uncharacterized protein SAOUHSC_00094 OS=Staphylococcus aureus (strain NCTC 8325) GN=SAOUHSC_00094 PE=1 SV=1 UPId=UP000008816 PPId=UP000008816
0.879972	1.24654	0.225556	2	4342700000	0.922298	0.784023	Q2G2M0	>tr|Q2G2M0|Q2G2M0_STAA8 Tautomerase OS=Staphylococcus aureus (strain NCTC 8325) GN=SAOUHSC_01362 PE=3 SV=1 UPId=UP000008816 PPId=UP000008816;>tr|A0A0M2NPE7|A0A0M2NPE7_9STAP Tautomerase OS=Staphylococcus pasteuri GN=UF70_0941 PE=3 SV=1 UPId=UP000034266 PPId
1.40993	0.171453	0.89596	2	348680000	0.828922	0.82578	Q2FZ72	>sp|Q2FZ72|CARB_STAA8 Carbamoyl-phosphate synthase large chain OS=Staphylococcus aureus (strain NCTC 8325) GN=carB PE=3 SV=1 UPId=UP000008816 PPId=UP000008816;>tr|A0A0U0VMJ5|A0A0U0VMJ5_STAHA Carbamoyl-phosphate synthase large chain OS=Staphylococcus haemol
0.290805	1.49167	NaN	3	94558000	0.423167	0.891238	Q2G105	>tr|Q2G105|Q2G105_STAA8 Uncharacterized protein OS=Staphylococcus aureus (strain NCTC 8325) GN=SAOUHSC_00356 PE=4 SV=1 UPId=UP000008816 PPId=UP000008816
0.595595	1.25601	NaN	1	459960000	0.661325	0.925803	Q5HQM1	>sp|Q5HQM1|Y527_STAEQ NADH dehydrogenase-like protein SERP0527 OS=Staphylococcus epidermidis (strain ATCC 35984 / RP62A) GN=SERP0527 PE=3 SV=1 UPId=UP000000531 PPId=UP000008816
0.78701	1.63282	0.377596	11	1503100000	0.893859	0.932477	Q2FVW4	>sp|Q2FVW4|Y2577_STAA8 Putative 2-hydroxyacid dehydrogenase SAOUHSC_02577 OS=Staphylococcus aureus (strain NCTC 8325) GN=SAOUHSC_02577 PE=3 SV=1 UPId=UP000008816 PPId=UP000008816
1.33705	NaN	0.537829	2	85970000	0.590866	0.937438	Q2G1S2	>tr|Q2G1S2|Q2G1S2_STAA8 Uncharacterized protein OS=Staphylococcus aureus (strain NCTC 8325) GN=SAOUHSC_00462 PE=4 SV=1 UPId=UP000008816 PPId=UP000008816
1.05343	0.337737	1.49855	4	1215600000	0.981742	0.963238	Q2FZ74	>tr|Q2FZ74|Q2FZ74_STAA8 Dihydroorotase OS=Staphylococcus aureus (strain NCTC 8325) GN=pyrC PE=3 SV=1 UPId=UP000008816 PPId=UP000008816
0.618652	0.563775	1.7219	6	779400000	0.905968	0.968108	Q2FVK5	>sp|Q2FVK5|SBI_STAA8 Immunoglobulin-binding protein sbi OS=Staphylococcus aureus (strain NCTC 8325) GN=sbi PE=1 SV=1 UPId=UP000008816 PPId=UP000008816
1.48436	0.319608	1.2189	4	408870000	0.984371	1.00762	Q2FZZ0	>tr|Q2FZZ0|Q2FZZ0_STAA8 Lipoprotein OS=Staphylococcus aureus (strain NCTC 8325) GN=SAOUHSC_00844 PE=3 SV=1 UPId=UP000008816 PPId=UP000008816
2.20575	0.00378252	NaN	2	1465500000	0.301979	1.10476	C5QP22	>tr|C5QP22|C5QP22_9STAP Methyltransferase domain protein OS=Staphylococcus caprae M23864:W1 GN=HMPREF0793_0978 PE=4 SV=1 UPId=UP000003152 PPId=UP000008816
0.89016	0.854692	1.69616	4	1014800000	1.27674	1.147	Q2FVQ2	>sp|Q2FVQ2|Y2650_STAA8 Uncharacterized lipoprotein SAOUHSC_02650 OS=Staphylococcus aureus (strain NCTC 8325) GN=SAOUHSC_02650 PE=3 SV=1 UPId=UP000008816 PPId=UP000008816
NaN	0.631047	1.6789	3	317290000	0.566847	1.15498	Q2FWX9	>tr|Q2FWX9|Q2FWX9_STAA8 Aldehyde dehydrogenase OS=Staphylococcus aureus (strain NCTC 8325) GN=SAOUHSC_02142 PE=3 SV=1 UPId=UP000008816 PPId=UP000008816
1.42753	0.45283	1.62766	6	6038300000	1.07414	1.16934	Q2G0D4	>tr|Q2G0D4|Q2G0D4_STAA8 Secretory antigen SsaA-like protein OS=Staphylococcus aureus (strain NCTC 8325) GN=SAOUHSC_00671 PE=4 SV=1 UPId=UP000008816 PPId=UP000008816
1.39676	0.858538	1.50812	11	6466500000	1.60871	1.25447	Q2G010	>tr|Q2G010|Q2G010_STAA8 Thermonuclease OS=Staphylococcus aureus (strain NCTC 8325) GN=SAOUHSC_00818 PE=4 SV=1 UPId=UP000008816 PPId=UP000008816
1.04376	1.21685	1.67297	11	2052300000	1.70168	1.31119	Q2G2S6	>sp|Q2G2S6|PRSA_STAA8 Foldase protein PrsA OS=Staphylococcus aureus (strain NCTC 8325) GN=prsA PE=3 SV=1 UPId=UP000008816 PPId=UP000008816
1.34732	1.04567	1.54796	13	7253600000	1.91638	1.31365	Q2FZU3	>tr|Q2FZU3|Q2FZU3_STAA8 Uncharacterized protein OS=Staphylococcus aureus (strain NCTC 8325) GN=SAOUHSC_00897 PE=4 SV=1 UPId=UP000008816 PPId=UP000008816
1.39862	1.19589	1.3823	36	14426000000	2.62021	1.3256	Q2FZK7	>sp|Q2FZK7|ATL_STAA8 Bifunctional autolysin OS=Staphylococcus aureus (strain NCTC 8325) GN=atl PE=1 SV=1 UPId=UP000008816 PPId=UP000008816
0.975214	1.68329	NaN	2	1717700000	0.780643	1.32925	G5JM96	>tr|G5JM96|G5JM96_9STAP Acetyl-CoA carboxylase, biotin carboxylase OS=Staphylococcus simiae CCM 7213 GN=SS7213T_13097 PE=4 SV=1 UPId=UP000005413 PPId=UP000008816
1.09318	1.52116	1.3799	29	18858000000	2.05433	1.33141	Q2FUU5	>sp|Q2FUU5|LIP1_STAA8 Lipase 1 OS=Staphylococcus aureus (strain NCTC 8325) GN=lipA PE=1 SV=1 UPId=UP000008816 PPId=UP000008816
1.50574	1.23971	1.57141	15	9819900000	2.30717	1.43895	Q2G222	>sp|Q2G222|Y2979_STAA8 N-acetylmuramoyl-L-alanine amidase domain-containing protein SAOUHSC_02979 OS=Staphylococcus aureus (strain NCTC 8325) GN=SAOUHSC_02979 PE=1 SV=1 UPId=UP000008816 PPId=UP000008816
1.86696	NaN	1.05168	2	337530000	0.760924	1.45932	Q2FUY2	>sp|Q2FUY2|CLFB_STAA8 Clumping factor B OS=Staphylococcus aureus (strain NCTC 8325) GN=clfB PE=1 SV=1 UPId=UP000008816 PPId=UP000008816
1.71053	1.67811	1.07201	2	617980000	1.72239	1.48688	Q2FZJ7	>tr|Q2FZJ7|Q2FZJ7_STAA8 Uncharacterized protein OS=Staphylococcus aureus (strain NCTC 8325) GN=SAOUHSC_01005 PE=4 SV=1 UPId=UP000008816 PPId=UP000008816
2.49848	NaN	0.573641	2	341120000	0.448154	1.53606	Q2G0Z9	>tr|Q2G0Z9|Q2G0Z9_STAA8 Uncharacterized protein OS=Staphylococcus aureus (strain NCTC 8325) GN=SAOUHSC_00362 PE=4 SV=1 UPId=UP000008816 PPId=UP000008816
1.50155	1.40259	1.98707	4	5253500000	1.91902	1.6304	Q2FV52	>sp|Q2FV52|ISAA_STAA8 Probable transglycosylase IsaA OS=Staphylococcus aureus (strain NCTC 8325) GN=isaA PE=1 SV=1 UPId=UP000008816 PPId=UP000008816
2.30438	0.709144	2.03261	10	2439700000	1.11838	1.68205	Q2FVK3	>tr|Q2FVK3|Q2FVK3_STAA8 Gamma-hemolysin h-gamma-ii subunit, putative OS=Staphylococcus aureus (strain NCTC 8325) GN=SAOUHSC_02708 PE=4 SV=1 UPId=UP000008816 PPId=UP000008816
2.064	1.45666	NaN	2	168640000	0.963561	1.76033	Q2G012	>sp|Q2G012|EMP_STAA8 Extracellular matrix protein-binding protein emp OS=Staphylococcus aureus (strain NCTC 8325) GN=emp PE=3 SV=1 UPId=UP000008816 PPId=UP000008816
1.50414	2.01865	NaN	7	241230000	1.03467	1.7614	Q2FUW9	>tr|Q2FUW9|Q2FUW9_STAA8 Uncharacterized protein OS=Staphylococcus aureus (strain NCTC 8325) GN=SAOUHSC_02982 PE=4 SV=1 UPId=UP000008816 PPId=UP000008816
1.39635	1.4898	2.5221	30	50933000000	1.42278	1.80275	Q2G155	>sp|Q2G155|LIP2_STAA8 Lipase 2 OS=Staphylococcus aureus (strain NCTC 8325) GN=lip2 PE=1 SV=1 UPId=UP000008816 PPId=UP000008816
1.67395	1.63169	2.12165	12	13383000000	2.12935	1.8091	Q2G0F2	>tr|Q2G0F2|Q2G0F2_STAA8 Uncharacterized protein OS=Staphylococcus aureus (strain NCTC 8325) GN=SAOUHSC_00617 PE=4 SV=1 UPId=UP000008816 PPId=UP000008816
1.87954	1.67143	2.0107	3	1880600000	2.5487	1.85389	T1YBK1	>tr|T1YBK1|T1YBK1_STAAU Complement inhibitor SCIN OS=Staphylococcus aureus subsp. aureus CN1 GN=SAKOR_01918 PE=4 SV=1 UPId=UP000016220 PPId=UP000008816;>sp|Q2FWV6|SCIN_STAA8 Staphylococcal complement inhibitor OS=Staphylococcus aureus (strain NCTC 8325) GN
2.00563	1.82053	2.41869	18	7320800000	2.14649	2.08162	Q2G093	>sp|Q2G093|LTAS_STAA8 Lipoteichoic acid synthase OS=Staphylococcus aureus (strain NCTC 8325) GN=ltaS PE=1 SV=1 UPId=UP000008816 PPId=UP000008816
2.23618	1.96201	NaN	7	703720000	1.38178	2.0991	Q2FUX4	>tr|Q2FUX4|Q2FUX4_STAA8 Aureolysin, putative OS=Staphylococcus aureus (strain NCTC 8325) GN=SAOUHSC_02971 PE=4 SV=1 UPId=UP000008816 PPId=UP000008816
2.19649	1.77946	2.43859	10	2725000000	2.09649	2.13818	Q2FZL3	>sp|Q2FZL3|SSPB_STAA8 Staphopain B OS=Staphylococcus aureus (strain NCTC 8325) GN=sspB PE=1 SV=1 UPId=UP000008816 PPId=UP000008816
0.876568	3.25088	2.35217	6	357590000	1.04981	2.15987	Q2FWP0	>sp|Q2FWP0|LUKL1_STAA8 Uncharacterized leukocidin-like protein 1 OS=Staphylococcus aureus (strain NCTC 8325) GN=SAOUHSC_02241 PE=1 SV=1 UPId=UP000008816 PPId=UP000008816
2.08278	2.10276	2.34968	7	855630000	2.80999	2.1784	Q2G2G0	>tr|Q2G2G0|Q2G2G0_STAA8 Uncharacterized protein OS=Staphylococcus aureus (strain NCTC 8325) GN=SAOUHSC_00717 PE=4 SV=1 UPId=UP000008816 PPId=UP000008816
2.43486	2.07397	2.7269	3	1310700000	2.21654	2.41191	Q2FYF1	>sp|Q2FYF1|EBPS_STAA8 Elastin-binding protein EbpS OS=Staphylococcus aureus (strain NCTC 8325) GN=ebpS PE=1 SV=1 UPId=UP000008816 PPId=UP000008816
-0.0930327	5.03302	NaN	2	257430000	0.290928	2.46999	Q2FY61	>tr|Q2FY61|Q2FY61_STAA8 Uncharacterized protein OS=Staphylococcus aureus (strain NCTC 8325) GN=SAOUHSC_01604 PE=4 SV=1 UPId=UP000008816 PPId=UP000008816
1.74945	NaN	3.20886	2	171150000	0.739371	2.47916	Q2G2Q0	>sp|Q2G2Q0|GYRA_STAA8 DNA gyrase subunit A OS=Staphylococcus aureus (strain NCTC 8325) GN=gyrA PE=1 SV=1 UPId=UP000008816 PPId=UP000008816
3.12406	2.36167	2.47466	8	1390700000	2.1013	2.65346	Q2FWW1	>tr|Q2FWW1|Q2FWW1_STAA8 MHC class II analog protein OS=Staphylococcus aureus (strain NCTC 8325) GN=SAOUHSC_02161 PE=4 SV=1 UPId=UP000008816 PPId=UP000008816
2.95025	2.3047	2.77114	4	1753200000	2.28967	2.67536	Q2FW51	>tr|Q2FW51|Q2FW51_STAA8 Truncated MHC class II analog protein OS=Staphylococcus aureus (strain NCTC 8325) GN=SAOUHSC_02466 PE=4 SV=1 UPId=UP000008816 PPId=UP000008816
1.94426	2.55981	3.57078	7	1030300000	1.52788	2.69161	Q2FWN9	>sp|Q2FWN9|LUKL2_STAA8 Uncharacterized leukocidin-like protein 2 OS=Staphylococcus aureus (strain NCTC 8325) GN=SAOUHSC_02243 PE=3 SV=1 UPId=UP000008816 PPId=UP000008816
3.83714	0.783667	4.6561	6	7326000000	0.921987	3.0923	Q2FUX3	>sp|Q2FUX3|ISAB_STAA8 Immunodominant staphylococcal antigen B OS=Staphylococcus aureus (strain NCTC 8325) GN=isaB PE=2 SV=1 UPId=UP000008816 PPId=UP000008816
3.40821	2.75765	3.32587	7	11506000000	2.3817	3.16391	Q2FZS2	>tr|Q2FZS2|Q2FZS2_STAA8 Truncated MHC class II analog protein OS=Staphylococcus aureus (strain NCTC 8325) GN=SAOUHSC_00918 PE=4 SV=1 UPId=UP000008816 PPId=UP000008816
0.872918	3.34106	5.92711	5	8999700000	0.834256	3.38036	Q2FWM8	>sp|Q2FWM8|HLD_STAA8 Delta-hemolysin OS=Staphylococcus aureus (strain NCTC 8325) GN=hld PE=3 SV=3 UPId=UP000008816 PPId=UP000008816
4.32144	2.84161	3.22834	3	1331700000	1.79657	3.4638	Q2FZB8	>tr|Q2FZB8|Q2FZB8_STAA8 Fibrinogen-binding protein OS=Staphylococcus aureus (strain NCTC 8325) GN=SAOUHSC_01114 PE=4 SV=1 UPId=UP000008816 PPId=UP000008816
3.95085	7.47395	1.53207	4	1169400000	0.888365	4.31896	Q2G0X2	>tr|Q2G0X2|Q2G0X2_STAA8 Uncharacterized protein OS=Staphylococcus aureus (strain NCTC 8325) GN=SAOUHSC_00401 PE=4 SV=1 UPId=UP000008816 PPId=UP000008816
#!{Type}E	E	E	N	N	N	N	T	T

## Sheet: 1-E2 vs DMSO
Ratio H/L normalized 1	Ratio H/L normalized 2	Ratio H/L normalized 3	Unique peptides	Intensity	-Log t-test p-value	t-test Difference	Uniprot ID	Fasta headers
-3.48614	-3.39753	-1.85563	10	3867000000	1.50211	-2.9131	Q2FVK2	>sp|Q2FVK2|HLGC_STAA8 Gamma-hemolysin component C OS=Staphylococcus aureus (strain NCTC 8325) GN=hlgC PE=1 SV=1 UPId=UP000008816 PPId=UP000008816
-2.54084	-2.8456	NaN	4	535630000	1.44392	-2.69322	Q2FXC3	>sp|Q2FXC3|SPLB_STAA8 Serine protease SplB OS=Staphylococcus aureus (strain NCTC 8325) GN=splB PE=1 SV=1 UPId=UP000008816 PPId=UP000008816
-2.14594	-2.64582	-1.50907	16	15188000000	1.62594	-2.10028	Q2FVK1	>sp|Q2FVK1|HLGB_STAA8 Gamma-hemolysin component B OS=Staphylococcus aureus (strain NCTC 8325) GN=hlgB PE=1 SV=1 UPId=UP000008816 PPId=UP000008816
-2.27212	-1.90386	NaN	3	413460000	1.25184	-2.08799	Q2FZB0	>tr|Q2FZB0|Q2FZB0_STAA8 Ornithine carbamoyltransferase OS=Staphylococcus aureus (strain NCTC 8325) GN=argF PE=3 SV=1 UPId=UP000008816 PPId=UP000008816
-1.82151	-3.01222	-1.32674	2	87394000	1.26341	-2.05349	Q2G2U6	>sp|Q2G2U6|WALR_STAA8 Transcriptional regulatory protein WalR OS=Staphylococcus aureus (strain NCTC 8325) GN=walR PE=1 SV=1 UPId=UP000008816 PPId=UP000008816
-2.18802	-1.69497	-1.66486	7	1141700000	2.08063	-1.84928	Q2FYJ2	>sp|Q2FYJ2|DHA1_STAA8 Alanine dehydrogenase 1 OS=Staphylococcus aureus (strain NCTC 8325) GN=ald1 PE=3 SV=1 UPId=UP000008816 PPId=UP000008816
-1.47628	-1.61047	-2.21245	12	3543800000	1.7951	-1.7664	Q2G218	>sp|Q2G218|LDH1_STAA8 L-lactate dehydrogenase 1 OS=Staphylococcus aureus (strain NCTC 8325) GN=ldh1 PE=3 SV=2 UPId=UP000008816 PPId=UP000008816
-2.07621	-0.846986	-1.65799	8	4549000000	1.28773	-1.52706	Q2FYJ3	>sp|Q2FYJ3|TDCB_STAA8 L-threonine dehydratase catabolic TdcB OS=Staphylococcus aureus (strain NCTC 8325) GN=tdcB PE=3 SV=1 UPId=UP000008816 PPId=UP000008816
-0.842086	-1.74639	-1.90638	3	1392000000	1.34117	-1.49828	Q2FWD8	>sp|Q2FWD8|RL31B_STAA8 50S ribosomal protein L31 type B OS=Staphylococcus aureus (strain NCTC 8325) GN=rpmE2 PE=3 SV=1 UPId=UP000008816 PPId=UP000008816
-1.5258	-1.3204	-1.6299	26	9004300000	2.43259	-1.49203	Q2G1D8	>sp|Q2G1D8|PFLB_STAA8 Formate acetyltransferase OS=Staphylococcus aureus (strain NCTC 8325) GN=pflB PE=3 SV=1 UPId=UP000008816 PPId=UP000008816
-2.52233	-0.31898	-1.61167	2	3247900000	0.835853	-1.48433	Q2FXY6	>sp|Q2FXY6|RS20_STAA8 30S ribosomal protein S20 OS=Staphylococcus aureus (strain NCTC 8325) GN=rpsT PE=3 SV=1 UPId=UP000008816 PPId=UP000008816
-1.022	-2.02072	-1.35983	6	1516400000	1.42368	-1.46751	Q2FW30	>sp|Q2FW30|RS13_STAA8 30S ribosomal protein S13 OS=Staphylococcus aureus (strain NCTC 8325) GN=rpsM PE=3 SV=1 UPId=UP000008816 PPId=UP000008816
-0.997311	-1.17447	-2.21208	2	995270000	1.2138	-1.46129	Q2FWN3	>sp|Q2FWN3|CH10_STAA8 10 kDa chaperonin OS=Staphylococcus aureus (strain NCTC 8325) GN=groS PE=3 SV=1 UPId=UP000008816 PPId=UP000008816;>tr|A0A0Q0WLU0|A0A0Q0WLU0_STAHA 10 kDa chaperonin OS=Staphylococcus haemolyticus GN=groS PE=3 SV=1 UPId=UP000053523 PPId
-0.901787	-1.7043	-1.60655	9	3365100000	1.50985	-1.40421	Q2FW38	>sp|Q2FW38|RL13_STAA8 50S ribosomal protein L13 OS=Staphylococcus aureus (strain NCTC 8325) GN=rplM PE=1 SV=1 UPId=UP000008816 PPId=UP000008816
-1.17533	-1.50965	-1.3053	15	3403000000	2.27496	-1.33009	Q2FZS8	>tr|Q2FZS8|Q2FZS8_STAA8 Chaperone protein ClpB OS=Staphylococcus aureus (strain NCTC 8325) GN=clpB PE=3 SV=1 UPId=UP000008816 PPId=UP000008816;>sp|Q99VB5|CLPB_STAAM Chaperone protein ClpB OS=Staphylococcus aureus (strain Mu50 / ATCC 700699) GN=clpB PE=3 SV
-1.82602	NaN	-0.827334	3	116860000	0.639836	-1.32668	Q2G1Y6	>tr|Q2G1Y6|Q2G1Y6_STAA8 GTP-binding protein TypA, putative OS=Staphylococcus aureus (strain NCTC 8325) GN=SAOUHSC_01058 PE=4 SV=1 UPId=UP000008816 PPId=UP000008816
-1.35847	-0.394162	-1.9609	15	2449200000	0.945948	-1.23784	Q2G0F8	>sp|Q2G0F8|SYR_STAA8 Arginine--tRNA ligase OS=Staphylococcus aureus (strain NCTC 8325) GN=argS PE=3 SV=1 UPId=UP000008816 PPId=UP000008816
NaN	-1.47288	-0.903545	3	327250000	0.824788	-1.18821	Q2FYI5	>sp|Q2FYI5|GPSB_STAA8 Cell cycle protein GpsB OS=Staphylococcus aureus (strain NCTC 8325) GN=gpsB PE=3 SV=1 UPId=UP000008816 PPId=UP000008816
-0.685708	-1.68708	-1.06885	11	1503100000	1.22919	-1.14721	Q2FVW4	>sp|Q2FVW4|Y2577_STAA8 Putative 2-hydroxyacid dehydrogenase SAOUHSC_02577 OS=Staphylococcus aureus (strain NCTC 8325) GN=SAOUHSC_02577 PE=3 SV=1 UPId=UP000008816 PPId=UP000008816
-0.912335	-1.00917	-1.4458	6	1024800000	1.68386	-1.12243	Q2FYM1	>sp|Q2FYM1|ODO1_STAA8 2-oxoglutarate dehydrogenase E1 component OS=Staphylococcus aureus (strain NCTC 8325) GN=odhA PE=3 SV=1 UPId=UP000008816 PPId=UP000008816
-0.788294	-1.07877	-1.47053	7	1601800000	1.52075	-1.11253	P0A0G2	>sp|P0A0G2|RL30_STAA8 50S ribosomal protein L30 OS=Staphylococcus aureus (strain NCTC 8325) GN=rpmD PE=1 SV=1 UPId=UP000008816 PPId=UP000008816
-1.28438	NaN	-0.940119	3	143950000	1.00989	-1.11225	Q2G0Q9	>sp|Q2G0Q9|HSLO_STAA8 33 kDa chaperonin OS=Staphylococcus aureus (strain NCTC 8325) GN=hslO PE=3 SV=1 UPId=UP000008816 PPId=UP000008816
-0.13517	-0.791592	-2.3712	6	906300000	0.620819	-1.09932	Q2FW22	>sp|Q2FW22|RL18_STAA8 50S ribosomal protein L18 OS=Staphylococcus aureus (strain NCTC 8325) GN=rplR PE=1 SV=1 UPId=UP000008816 PPId=UP000008816
-1.22992	NaN	-0.940814	2	87971000	1.07422	-1.08536	A0A0U0	>tr|A0A0U0VE99|A0A0U0VE99_STAHA GTP-binding protein YqeH%2C possibly involved in replication initiation OS=Staphylococcus haemolyticus GN=yqeH PE=4 SV=1 UPId=UP000046272 PPId=UP000008816;>tr|Q2FXY0|Q2FXY0_STAA8 Uncharacterized protein OS=Staphylococcus aur
-1.23249	-1.20669	-0.816229	5	1378900000	1.82238	-1.08514	P48940	>sp|P48940|RS7_STAA8 30S ribosomal protein S7 OS=Staphylococcus aureus (strain NCTC 8325) GN=rpsG PE=3 SV=2 UPId=UP000008816 PPId=UP000008816
-1.56811	-0.576067	NaN	1	290370000	0.559293	-1.07209	Q2FWN4	>sp|Q2FWN4|CH60_STAA8 60 kDa chaperonin OS=Staphylococcus aureus (strain NCTC 8325) GN=groL PE=3 SV=1 UPId=UP000008816 PPId=UP000008816
-1.07713	-1.24188	-0.877391	19	10560000000	2.01588	-1.06547	Q2FXZ2	>sp|Q2FXZ2|DNAK_STAA8 Chaperone protein DnaK OS=Staphylococcus aureus (strain NCTC 8325) GN=dnaK PE=3 SV=1 UPId=UP000008816 PPId=UP000008816
-0.932612	-1.41375	-0.837227	4	542730000	1.56669	-1.0612	Q2FW31	>sp|Q2FW31|RS11_STAA8 30S ribosomal protein S11 OS=Staphylococcus aureus (strain NCTC 8325) GN=rpsK PE=3 SV=1 UPId=UP000008816 PPId=UP000008816
-0.282632	-0.981096	-1.89166	5	778150000	0.816695	-1.05179	Q2FZD8	>tr|Q2FZD8|Q2FZD8_STAA8 Phenylalanine--tRNA ligase beta subunit OS=Staphylococcus aureus (strain NCTC 8325) GN=pheT PE=3 SV=1 UPId=UP000008816 PPId=UP000008816
-0.700209	-0.616391	-1.76956	9	2582300000	0.96147	-1.02872	Q2G0Y6	>sp|Q2G0Y6|GUAA_STAA8 GMP synthase [glutamine-hydrolyzing] OS=Staphylococcus aureus (strain NCTC 8325) GN=guaA PE=3 SV=1 UPId=UP000008816 PPId=UP000008816;>tr|C5QPG8|C5QPG8_9STAP GMP synthase [glutamine-hydrolyzing] OS=Staphylococcus caprae M23864:W1 GN=gu
-1.12015	-1.2372	-0.553931	17	4311000000	1.35501	-0.970426	Q2G0P5	>sp|Q2G0P5|CLPC_STAA8 ATP-dependent Clp protease ATP-binding subunit ClpC OS=Staphylococcus aureus (strain NCTC 8325) GN=clpC PE=1 SV=1 UPId=UP000008816 PPId=UP000008816
-1.54624	-0.280911	NaN	3	200990000	0.413874	-0.913573	Q2FW96	>sp|Q2FW96|MTLD_STAA8 Mannitol-1-phosphate 5-dehydrogenase OS=Staphylococcus aureus (strain NCTC 8325) GN=mtlD PE=3 SV=1 UPId=UP000008816 PPId=UP000008816
NaN	-1.10662	-0.717302	4	386240000	0.873287	-0.911963	Q2FXJ5	>sp|Q2FXJ5|SYY_STAA8 Tyrosine--tRNA ligase OS=Staphylococcus aureus (strain NCTC 8325) GN=tyrS PE=3 SV=1 UPId=UP000008816 PPId=UP000008816
-1.00107	-0.656255	-1.06668	5	2243700000	1.71916	-0.908003	Q2G0Q1	>sp|Q2G0Q1|PDXS_STAA8 Pyridoxal 5-phosphate synthase subunit PdxS OS=Staphylococcus aureus (strain NCTC 8325) GN=pdxS PE=3 SV=1 UPId=UP000008816 PPId=UP000008816
-1.31691	-0.271038	-1.13283	3	486560000	0.972542	-0.906927	Q2FY16	>sp|Q2FY16|END4_STAA8 Probable endonuclease 4 OS=Staphylococcus aureus (strain NCTC 8325) GN=nfo PE=3 SV=1 UPId=UP000008816 PPId=UP000008816;>tr|G5JGI5|G5JGI5_9STAP Endonuclease IV (Fragment) OS=Staphylococcus simiae CCM 7213 GN=SS7213T_02768 PE=3 SV=1 UPI
-0.873806	-0.531472	-1.30274	9	2666900000	1.25174	-0.902674	Q2FXP7	>sp|Q2FXP7|SYT_STAA8 Threonine--tRNA ligase OS=Staphylococcus aureus (strain NCTC 8325) GN=thrS PE=3 SV=1 UPId=UP000008816 PPId=UP000008816
-1.18783	0.178081	-1.69582	7	4643900000	0.60499	-0.901855	Q2FW32	>sp|Q2FW32|RPOA_STAA8 DNA-directed RNA polymerase subunit alpha OS=Staphylococcus aureus (strain NCTC 8325) GN=rpoA PE=3 SV=1 UPId=UP000008816 PPId=UP000008816
-0.693141	-0.208429	-1.76719	4	1498000000	0.714094	-0.889586	Q2FZL5	>tr|Q2FZL5|Q2FZL5_STAA8 1,4-dihydroxy-2-naphthoyl-CoA synthase OS=Staphylococcus aureus (strain NCTC 8325) GN=menB PE=3 SV=1 UPId=UP000008816 PPId=UP000008816
-1.00432	-0.356403	-1.29698	2	462280000	1.06594	-0.8859	Q2FWE0	>sp|Q2FWE0|RF1_STAA8 Peptide chain release factor 1 OS=Staphylococcus aureus (strain NCTC 8325) GN=prfA PE=3 SV=1 UPId=UP000008816 PPId=UP000008816;>tr|A0A0U0VSM8|A0A0U0VSM8_STAHA Peptide chain release factor 1 OS=Staphylococcus haemolyticus GN=prfA PE=4 S
-0.788343	-0.704969	-1.15571	10	709210000	1.62495	-0.883008	Q2G0Q3	>sp|Q2G0Q3|SYK_STAA8 Lysine--tRNA ligase OS=Staphylococcus aureus (strain NCTC 8325) GN=lysS PE=3 SV=1 UPId=UP000008816 PPId=UP000008816
-0.896575	-0.476113	-1.24572	9	2570800000	1.22724	-0.872801	Q2G029	>tr|Q2G029|Q2G029_STAA8 2,3-bisphosphoglycerate-independent phosphoglycerate mutase OS=Staphylococcus aureus (strain NCTC 8325) GN=gpmI PE=1 SV=1 UPId=UP000008816 PPId=UP000008816
-0.556604	-0.320213	-1.72511	9	2260500000	0.735404	-0.86731	Q2FWE5	>sp|Q2FWE5|GLYA_STAA8 Serine hydroxymethyltransferase OS=Staphylococcus aureus (strain NCTC 8325) GN=glyA PE=3 SV=1 UPId=UP000008816 PPId=UP000008816
-0.810832	-0.565692	-1.19659	5	3540600000	1.36748	-0.857704	Q2FY41	>sp|Q2FY41|EFP_STAA8 Elongation factor P OS=Staphylococcus aureus (strain NCTC 8325) GN=efp PE=3 SV=1 UPId=UP000008816 PPId=UP000008816
-0.868683	-0.841783	NaN	2	285650000	1.99953	-0.855233	A0A0U0	>tr|A0A0U0VMK6|A0A0U0VMK6_STAHA Phosphoglucomutase/phosphomannomutase alpha/beta/subunit OS=Staphylococcus haemolyticus GN=pgcA PE=3 SV=1 UPId=UP000046272 PPId=UP000008816;>sp|Q2FVC1|PGCA_STAA8 Phosphoglucomutase OS=Staphylococcus aureus (strain NCTC 8325)
-1.42736	-0.263579	NaN	6	301690000	0.415952	-0.845469	Q2G077	>tr|Q2G077|Q2G077_STAA8 Ribonucleotide-disphosphate reductase beta chain, putative OS=Staphylococcus aureus (strain NCTC 8325) GN=SAOUHSC_00743 PE=4 SV=1 UPId=UP000008816 PPId=UP000008816
-0.557472	-0.232046	-1.73802	9	3879800000	0.684271	-0.842513	Q2FZG4	>tr|Q2FZG4|Q2FZG4_STAA8 Pyruvate dehydrogenase complex, E1 component, alpha subunit, putative OS=Staphylococcus aureus (strain NCTC 8325) GN=SAOUHSC_01040 PE=4 SV=1 UPId=UP000008816 PPId=UP000008816
-0.8223	-0.0265451	-1.65218	5	913750000	0.662231	-0.833674	Q2FXM5	>tr|Q2FXM5|Q2FXM5_STAA8 NADP-dependent malic enzyme, putative OS=Staphylococcus aureus (strain NCTC 8325) GN=SAOUHSC_01810 PE=3 SV=1 UPId=UP000008816 PPId=UP000008816
-0.927709	-0.592083	-0.930405	7	324980000	1.7353	-0.816732	Q2G2M6	>sp|Q2G2M6|SYC_STAA8 Cysteine--tRNA ligase OS=Staphylococcus aureus (strain NCTC 8325) GN=cysS PE=3 SV=1 UPId=UP000008816 PPId=UP000008816
-0.967678	-0.453464	-1.01508	5	274560000	1.34008	-0.812074	Q2FXM8	>sp|Q2FXM8|PFKA_STAA8 ATP-dependent 6-phosphofructokinase OS=Staphylococcus aureus (strain NCTC 8325) GN=pfkA PE=1 SV=2 UPId=UP000008816 PPId=UP000008816
-0.688878	-0.38432	-1.3297	5	821350000	0.988477	-0.800967	Q2FW17	>sp|Q2FW17|RL24_STAA8 50S ribosomal protein L24 OS=Staphylococcus aureus (strain NCTC 8325) GN=rplX PE=1 SV=1 UPId=UP000008816 PPId=UP000008816
-0.461082	-1.10982	NaN	3	40645000	0.603234	-0.785452	Q2FZ92	>sp|Q2FZ92|MURD_STAA8 UDP-N-acetylmuramoylalanine--D-glutamate ligase OS=Staphylococcus aureus (strain NCTC 8325) GN=murD PE=3 SV=1 UPId=UP000008816 PPId=UP000008816
-0.332011	-0.42583	-1.58005	2	178780000	0.717527	-0.779297	Q2FXI9	>tr|Q2FXI9|Q2FXI9_STAA8 Uncharacterized protein OS=Staphylococcus aureus (strain NCTC 8325) GN=SAOUHSC_01857 PE=3 SV=1 UPId=UP000008816 PPId=UP000008816;>tr|A0A0U0VIK1|A0A0U0VIK1_STAHA SpoIIIE family cell division protein OS=Staphylococcus haemolyticus GN=
-0.846234	-0.997371	-0.488197	12	8872200000	1.44709	-0.777267	Q2G1Y5	>sp|Q2G1Y5|LDH2_STAA8 L-lactate dehydrogenase 2 OS=Staphylococcus aureus (strain NCTC 8325) GN=ldh2 PE=3 SV=1 UPId=UP000008816 PPId=UP000008816
-0.943046	-1.0276	-0.33195	8	3807200000	1.1382	-0.767533	Q2FZP9	>sp|Q2FZP9|Y951_STAA8 Putative phosphoesterase SAOUHSC_00951 OS=Staphylococcus aureus (strain NCTC 8325) GN=SAOUHSC_00951 PE=3 SV=1 UPId=UP000008816 PPId=UP000008816
-1.72899	0.238401	NaN	1	829250000	0.231192	-0.745296	Q2G2Q1	>sp|Q2G2Q1|RS15_STAA8 30S ribosomal protein S15 OS=Staphylococcus aureus (strain NCTC 8325) GN=rpsO PE=3 SV=1 UPId=UP000008816 PPId=UP000008816
-0.536383	-0.255085	-1.42979	3	114650000	0.765279	-0.740418	Q2G261	>sp|Q2G261|SODM2_STAA8 Superoxide dismutase [Mn/Fe] 2 OS=Staphylococcus aureus (strain NCTC 8325) GN=sodM PE=1 SV=1 UPId=UP000008816 PPId=UP000008816
-0.605241	-0.465583	-1.13926	10	4492200000	1.15718	-0.736695	Q2FZ21	>sp|Q2FZ21|RRF_STAA8 Ribosome-recycling factor OS=Staphylococcus aureus (strain NCTC 8325) GN=frr PE=3 SV=1 UPId=UP000008816 PPId=UP000008816
-1.05019	0.149546	-1.25653	4	541670000	0.615064	-0.719058	Q2FWC3	>sp|Q2FWC3|LUXS_STAA8 S-ribosylhomocysteine lyase OS=Staphylococcus aureus (strain NCTC 8325) GN=luxS PE=3 SV=1 UPId=UP000008816 PPId=UP000008816
-0.533069	-0.440789	-1.14772	20	7374300000	1.06586	-0.707191	P47768	>sp|P47768|RPOB_STAA8 DNA-directed RNA polymerase subunit beta OS=Staphylococcus aureus (strain NCTC 8325) GN=rpoB PE=3 SV=2 UPId=UP000008816 PPId=UP000008816
-0.719634	-0.80037	-0.590109	10	2859900000	2.12521	-0.703371	Q2FWY1	>sp|Q2FWY1|PPAC_STAA8 Probable manganese-dependent inorganic pyrophosphatase OS=Staphylococcus aureus (strain NCTC 8325) GN=ppaC PE=3 SV=1 UPId=UP000008816 PPId=UP000008816
-0.657015	-0.299631	-1.11257	5	296120000	1.00305	-0.689738	Q2FY08	>sp|Q2FY08|SYG_STAA8 Glycine--tRNA ligase OS=Staphylococcus aureus (strain NCTC 8325) GN=glyQS PE=3 SV=1 UPId=UP000008816 PPId=UP000008816
-0.567489	-0.596684	-0.881142	4	2072900000	1.68068	-0.681772	Q2G189	>tr|Q2G189|Q2G189_STAA8 ESAT-6-like protein OS=Staphylococcus aureus (strain NCTC 8325) GN=SAOUHSC_00257 PE=3 SV=1 UPId=UP000008816 PPId=UP000008816
-0.935193	-0.335993	-0.740422	6	671130000	1.20199	-0.670536	Q2G236	>sp|Q2G236|NADE_STAA8 NH(3)-dependent NAD(+) synthetase OS=Staphylococcus aureus (strain NCTC 8325) GN=nadE PE=3 SV=1 UPId=UP000008816 PPId=UP000008816
-1.04998	-0.473285	-0.48362	5	1751300000	1.14014	-0.668963	Q2FWX1	>tr|Q2FWX1|Q2FWX1_STAA8 Uncharacterized protein OS=Staphylococcus aureus (strain NCTC 8325) GN=SAOUHSC_02150 PE=4 SV=1 UPId=UP000008816 PPId=UP000008816
-0.873408	-0.462293	NaN	3	193210000	0.721048	-0.667851	Q2G0L8	>tr|Q2G0L8|Q2G0L8_STAA8 Uncharacterized protein OS=Staphylococcus aureus (strain NCTC 8325) GN=SAOUHSC_00542 PE=4 SV=1 UPId=UP000008816 PPId=UP000008816
-0.772086	-0.826641	-0.386526	10	2459900000	1.38588	-0.661751	Q2FZ53	>tr|Q2FZ53|Q2FZ53_STAA8 3-oxoacyl-(Acyl-carrier-protein) reductase, putative OS=Staphylococcus aureus (strain NCTC 8325) GN=SAOUHSC_01199 PE=1 SV=1 UPId=UP000008816 PPId=UP000008816
-1.02511	0.0399046	-0.969537	10	425380000	0.697954	-0.65158	Q2FWC1	>sp|Q2FWC1|PDP_STAA8 Pyrimidine-nucleoside phosphorylase OS=Staphylococcus aureus (strain NCTC 8325) GN=pdp PE=3 SV=1 UPId=UP000008816 PPId=UP000008816
-0.3079	-1.01258	-0.628497	7	6279900000	1.0663	-0.649659	P48860	>sp|P48860|RL7_STAA8 50S ribosomal protein L7/L12 OS=Staphylococcus aureus (strain NCTC 8325) GN=rplL PE=3 SV=2 UPId=UP000008816 PPId=UP000008816
-0.521108	-0.818693	-0.589931	7	1117700000	1.7213	-0.643244	Q2G235	>tr|Q2G235|Q2G235_STAA8 Nicotinate phosphoribosyltransferase OS=Staphylococcus aureus (strain NCTC 8325) GN=SAOUHSC_02133 PE=3 SV=1 UPId=UP000008816 PPId=UP000008816
-0.850287	-0.431205	NaN	3	58970000	0.696345	-0.640746	Q2FZ59	>tr|Q2FZ59|Q2FZ59_STAA8 Uncharacterized protein OS=Staphylococcus aureus (strain NCTC 8325) GN=SAOUHSC_01192 PE=4 SV=1 UPId=UP000008816 PPId=UP000008816
-0.351397	-0.317007	-1.23641	4	143130000	0.771325	-0.634937	Q2FXX8	>sp|Q2FXX8|MTNN_STAA8 5-methylthioadenosine/S-adenosylhomocysteine nucleosidase OS=Staphylococcus aureus (strain NCTC 8325) GN=mtnN PE=3 SV=1 UPId=UP000008816 PPId=UP000008816
-0.441466	-0.638216	-0.820581	3	5822200000	1.54376	-0.633421	Q2FW79	>sp|Q2FW79|Y2425_STAA8 UPF0457 protein SAOUHSC_02425 OS=Staphylococcus aureus (strain NCTC 8325) GN=SAOUHSC_02425 PE=3 SV=1 UPId=UP000008816 PPId=UP000008816
-0.690109	-0.842729	-0.36249	7	1548400000	1.32992	-0.631776	Q2G2A4	>tr|Q2G2A4|Q2G2A4_STAA8 Dihydrolipoamide S-acetyltransferase component of pyruvate dehydrogenase complex E2, putative OS=Staphylococcus aureus (strain NCTC 8325) GN=SAOUHSC_01042 PE=3 SV=1 UPId=UP000008816 PPId=UP000008816
-1.35047	0.244062	-0.787352	6	991090000	0.510116	-0.631253	Q2FW20	>sp|Q2FW20|RS8_STAA8 30S ribosomal protein S8 OS=Staphylococcus aureus (strain NCTC 8325) GN=rpsH PE=3 SV=1 UPId=UP000008816 PPId=UP000008816
-1.29352	-1.02725	0.527712	3	3719300000	0.394693	-0.597687	Q2FW28	>sp|Q2FW28|IF1_STAA8 Translation initiation factor IF-1 OS=Staphylococcus aureus (strain NCTC 8325) GN=infA PE=3 SV=1 UPId=UP000008816 PPId=UP000008816
-1.2063	NaN	0.0196984	3	244860000	0.292094	-0.593303	Q2FXA4	>tr|Q2FXA4|Q2FXA4_STAA8 Ferrochelatase OS=Staphylococcus aureus (strain NCTC 8325) GN=hemH PE=3 SV=1 UPId=UP000008816 PPId=UP000008816
-0.167364	-0.849449	-0.75793	3	868660000	0.960518	-0.591581	Q2G1T9	>sp|Q2G1T9|RPOZ_STAA8 DNA-directed RNA polymerase subunit omega OS=Staphylococcus aureus (strain NCTC 8325) GN=rpoZ PE=3 SV=1 UPId=UP000008816 PPId=UP000008816
0.794627	-1.00941	-1.55844	2	716470000	0.307065	-0.591075	Q2FW16	>sp|Q2FW16|RL14_STAA8 50S ribosomal protein L14 OS=Staphylococcus aureus (strain NCTC 8325) GN=rplN PE=1 SV=1 UPId=UP000008816 PPId=UP000008816
-0.211176	-0.632581	-0.921559	5	1714800000	0.982816	-0.588438	P0C0V7	>sp|P0C0V7|GLMM_STAA8 Phosphoglucosamine mutase OS=Staphylococcus aureus (strain NCTC 8325) GN=glmM PE=1 SV=1 UPId=UP000008816 PPId=UP000008816
-0.397293	-0.527602	-0.814128	10	4194700000	1.37399	-0.579674	Q2G1W2	>sp|Q2G1W2|PCKA_STAA8 Phosphoenolpyruvate carboxykinase [ATP] OS=Staphylococcus aureus (strain NCTC 8325) GN=pckA PE=3 SV=1 UPId=UP000008816 PPId=UP000008816
-0.250679	-0.253671	-1.22349	5	681840000	0.663079	-0.575949	Q2G1K9	>tr|Q2G1K9|Q2G1K9_STAA8 Aldehyde-alcohol dehydrogenase OS=Staphylococcus aureus (strain NCTC 8325) GN=SAOUHSC_00113 PE=3 SV=1 UPId=UP000008816 PPId=UP000008816
-0.70596	-0.813811	-0.203097	12	5604900000	1.03295	-0.574289	Q2FVA3	>tr|Q2FVA3|Q2FVA3_STAA8 D-lactate dehydrogenase, putative OS=Staphylococcus aureus (strain NCTC 8325) GN=SAOUHSC_02830 PE=3 SV=1 UPId=UP000008816 PPId=UP000008816
-0.816758	-0.530385	-0.351159	13	4800000000	1.27688	-0.566101	Q2FZU6	>tr|Q2FZU6|Q2FZU6_STAA8 Ornithine aminotransferase OS=Staphylococcus aureus (strain NCTC 8325) GN=rocD PE=3 SV=1 UPId=UP000008816 PPId=UP000008816
-0.527219	-0.582633	-0.586233	14	18159000000	2.94336	-0.565362	Q2G032	>tr|Q2G032|Q2G032_STAA8 Glyceraldehyde-3-phosphate dehydrogenase OS=Staphylococcus aureus (strain NCTC 8325) GN=SAOUHSC_00795 PE=3 SV=1 UPId=UP000008816 PPId=UP000008816
0.467953	-0.414682	-1.74012	4	62631000	0.324869	-0.562281	Q2G1N7	>sp|Q2G1N7|SARS_STAA8 HTH-type transcriptional regulator SarS OS=Staphylococcus aureus (strain NCTC 8325) GN=sarS PE=1 SV=1 UPId=UP000008816 PPId=UP000008816;>tr|A0A0E1XCR9|A0A0E1XCR9_STAAU HTH-type transcriptional regulator SarS OS=Staphylococcus aureus s
-0.296308	-1.38319	0.0251663	3	601140000	0.488251	-0.551444	Q2FW23	>sp|Q2FW23|RS5_STAA8 30S ribosomal protein S5 OS=Staphylococcus aureus (strain NCTC 8325) GN=rpsE PE=3 SV=1 UPId=UP000008816 PPId=UP000008816
-0.804867	0.0980691	-0.943397	5	243940000	0.630591	-0.550065	Q2FVX8	>tr|Q2FVX8|Q2FVX8_STAA8 Molybdenum cofactor biosynthesis protein B OS=Staphylococcus aureus (strain NCTC 8325) GN=SAOUHSC_02544 PE=3 SV=1 UPId=UP000008816 PPId=UP000008816
-0.373491	-1.19873	-0.0577944	6	897540000	0.599879	-0.543337	Q2FXZ1	>sp|Q2FXZ1|GRPE_STAA8 Protein GrpE OS=Staphylococcus aureus (strain NCTC 8325) GN=grpE PE=3 SV=1 UPId=UP000008816 PPId=UP000008816
-0.337816	-0.542713	-0.71304	7	2363700000	1.40605	-0.531189	Q2FW27	>tr|Q2FW27|Q2FW27_STAA8 Adenylate kinase OS=Staphylococcus aureus (strain NCTC 8325) GN=adk PE=3 SV=1 UPId=UP000008816 PPId=UP000008816
-0.362037	-0.300285	-0.916725	14	18698000000	0.938574	-0.526349	P0A0B7	>sp|P0A0B7|AHPC_STAA8 Alkyl hydroperoxide reductase subunit C OS=Staphylococcus aureus (strain NCTC 8325) GN=ahpC PE=1 SV=1 UPId=UP000008816 PPId=UP000008816
-0.00764134	0.00483054	-1.57094	12	2104300000	0.375072	-0.524584	Q2G1R9	>tr|Q2G1R9|Q2G1R9_STAA8 Methionine--tRNA ligase OS=Staphylococcus aureus (strain NCTC 8325) GN=metG PE=3 SV=1 UPId=UP000008816 PPId=UP000008816;>tr|A0A0U0VNB8|A0A0U0VNB8_STAHA Methionyl-tRNA synthetase OS=Staphylococcus haemolyticus GN=metS_2 PE=4 SV=1 UPI
-0.354248	-1.23562	0.0465437	7	342500000	0.512503	-0.514442	Q2FZ20	>sp|Q2FZ20|PNP_STAA8 Polyribonucleotide nucleotidyltransferase OS=Staphylococcus aureus (strain NCTC 8325) GN=pnp PE=1 SV=1 UPId=UP000008816 PPId=UP000008816
0.177755	-0.661521	-1.0439	9	2380700000	0.532252	-0.509224	Q2FXA0	>sp|Q2FXA0|Y1977_STAA8 UPF0342 protein SAOUHSC_01977 OS=Staphylococcus aureus (strain NCTC 8325) GN=SAOUHSC_01977 PE=3 SV=1 UPId=UP000008816 PPId=UP000008816
-0.689635	-0.203724	-0.633644	33	7076800000	1.09607	-0.509001	Q2G0N5	>sp|Q2G0N5|RPOC_STAA8 DNA-directed RNA polymerase subunit beta OS=Staphylococcus aureus (strain NCTC 8325) GN=rpoC PE=3 SV=2 UPId=UP000008816 PPId=UP000008816
-0.23123	-0.0244934	-1.26195	5	650960000	0.498736	-0.50589	Q2FX90	>tr|Q2FX90|Q2FX90_STAA8 Uncharacterized protein OS=Staphylococcus aureus (strain NCTC 8325) GN=SAOUHSC_01987 PE=4 SV=1 UPId=UP000008816 PPId=UP000008816
-0.354032	-0.706337	-0.449153	4	3436600000	1.38659	-0.503174	Q2FW14	>sp|Q2FW14|RL29_STAA8 50S ribosomal protein L29 OS=Staphylococcus aureus (strain NCTC 8325) GN=rpmC PE=1 SV=1 UPId=UP000008816 PPId=UP000008816
-0.575605	-1.01199	0.0854778	11	802100000	0.589911	-0.500704	Q2FYZ4	>sp|Q2FYZ4|GLPD_STAA8 Aerobic glycerol-3-phosphate dehydrogenase OS=Staphylococcus aureus (strain NCTC 8325) GN=glpD PE=3 SV=1 UPId=UP000008816 PPId=UP000008816;>sp|Q5HPP0|GLPD_STAEQ Aerobic glycerol-3-phosphate dehydrogenase OS=Staphylococcus epidermidis
-0.321713	-0.855801	-0.322203	21	6875700000	0.971456	-0.499906	Q2FZ23	>sp|Q2FZ23|EFTS_STAA8 Elongation factor Ts OS=Staphylococcus aureus (strain NCTC 8325) GN=tsf PE=3 SV=1 UPId=UP000008816 PPId=UP000008816
-0.650123	-1.00196	0.172298	10	3017200000	0.534578	-0.493261	P95689	>sp|P95689|SYS_STAA8 Serine--tRNA ligase OS=Staphylococcus aureus (strain NCTC 8325) GN=serS PE=3 SV=1 UPId=UP000008816 PPId=UP000008816
0.500654	-0.29081	-1.67455	7	710470000	0.281728	-0.488234	Q2FVT5	>tr|Q2FVT5|Q2FVT5_STAA8 Urocanate hydratase OS=Staphylococcus aureus (strain NCTC 8325) GN=hutU PE=3 SV=1 UPId=UP000008816 PPId=UP000008816
NaN	-0.331907	-0.608709	2	143310000	0.739454	-0.470308	Q2FXZ9	>sp|Q2FXZ9|Y1676_STAA8 UPF0365 protein SAOUHSC_01676 OS=Staphylococcus aureus (strain NCTC 8325) GN=SAOUHSC_01676 PE=3 SV=1 UPId=UP000008816 PPId=UP000008816
0.0125255	-1.00941	-0.408083	6	1095200000	0.593403	-0.468324	Q2G1C0	>sp|Q2G1C0|ISPD_STAA8 2-C-methyl-D-erythritol 4-phosphate cytidylyltransferase OS=Staphylococcus aureus (strain NCTC 8325) GN=ispD PE=3 SV=1 UPId=UP000008816 PPId=UP000008816
-0.873955	-0.440831	-0.084562	4	346260000	0.75035	-0.46645	Q2G2H4	>tr|Q2G2H4|Q2G2H4_STAA8 DNA polymerase III subunit beta OS=Staphylococcus aureus (strain NCTC 8325) GN=SAOUHSC_00002 PE=4 SV=1 UPId=UP000008816 PPId=UP000008816;>sp|Q5HK00|DPO3B_STAEQ DNA polymerase III subunit beta OS=Staphylococcus epidermidis (strain AT
-0.523461	-0.603286	-0.269977	7	2470300000	1.36096	-0.465575	Q2FWE6	>sp|Q2FWE6|UPP_STAA8 Uracil phosphoribosyltransferase OS=Staphylococcus aureus (strain NCTC 8325) GN=upp PE=3 SV=1 UPId=UP000008816 PPId=UP000008816
-0.139408	-0.703102	-0.550934	3	483140000	0.958156	-0.464482	Q2FZV6	>tr|Q2FZV6|Q2FZV6_STAA8 Leucine aminopeptidase 2, chloroplastic OS=Staphylococcus aureus (strain NCTC 8325) GN=SAOUHSC_00879 PE=3 SV=1 UPId=UP000008816 PPId=UP000008816
-0.605611	-0.472471	-0.293909	6	582680000	1.43363	-0.45733	Q2FVY0	>tr|Q2FVY0|Q2FVY0_STAA8 Molybdopterin biosynthesis protein moeA, putative OS=Staphylococcus aureus (strain NCTC 8325) GN=SAOUHSC_02542 PE=4 SV=1 UPId=UP000008816 PPId=UP000008816
-1.1809	0.245829	-0.367566	7	1839300000	0.394075	-0.434211	Q2FW39	>sp|Q2FW39|RS9_STAA8 30S ribosomal protein S9 OS=Staphylococcus aureus (strain NCTC 8325) GN=rpsI PE=3 SV=1 UPId=UP000008816 PPId=UP000008816
-0.382932	-0.728512	-0.180175	5	1585300000	0.939714	-0.43054	Q2FWV3	>tr|Q2FWV3|Q2FWV3_STAA8 Staphylokinase, putative OS=Staphylococcus aureus (strain NCTC 8325) GN=SAOUHSC_02171 PE=4 SV=1 UPId=UP000008816 PPId=UP000008816
-0.864559	-0.478986	0.0547483	7	2102600000	0.604997	-0.429599	Q2FZX0	>sp|Q2FZX0|NAGD_STAA8 Acid sugar phosphatase OS=Staphylococcus aureus (strain NCTC 8325) GN=nagD PE=3 SV=1 UPId=UP000008816 PPId=UP000008816
-0.469146	-0.639425	-0.173538	12	2304900000	1.05449	-0.42737	Q2G030	>sp|Q2G030|TPIS_STAA8 Triosephosphate isomerase OS=Staphylococcus aureus (strain NCTC 8325) GN=tpiA PE=3 SV=1 UPId=UP000008816 PPId=UP000008816
-0.271626	-0.255206	-0.743085	9	1418000000	0.92797	-0.423306	Q2G2R8	>sp|Q2G2R8|SSPP_STAA8 Staphopain A OS=Staphylococcus aureus (strain NCTC 8325) GN=sspP PE=1 SV=1 UPId=UP000008816 PPId=UP000008816
-0.312812	NaN	-0.531785	4	413220000	0.791839	-0.422299	O34090	>sp|O34090|HEM3_STAA8 Porphobilinogen deaminase OS=Staphylococcus aureus (strain NCTC 8325) GN=hemC PE=3 SV=1 UPId=UP000008816 PPId=UP000008816
-0.224505	-0.0306522	-0.984396	10	5312700000	0.535323	-0.413184	Q2FV76	>tr|Q2FV76|Q2FV76_STAA8 HMG-CoA synthase, putative OS=Staphylococcus aureus (strain NCTC 8325) GN=SAOUHSC_02860 PE=4 SV=1 UPId=UP000008816 PPId=UP000008816
-0.711909	-0.106835	NaN	2	255680000	0.392362	-0.409372	Q2G270	>tr|Q2G270|Q2G270_STAA8 Uncharacterized protein OS=Staphylococcus aureus (strain NCTC 8325) GN=SAOUHSC_02568 PE=4 SV=1 UPId=UP000008816 PPId=UP000008816
-0.0666934	-0.393449	-0.728725	4	140640000	0.759816	-0.396289	A0A0T7	>tr|A0A0T7M8V7|A0A0T7M8V7_STAAU Smooth muscle caldesmon OS=Staphylococcus aureus GN=ERS093009_02402 PE=4 SV=1 UPId=UP000047221 PPId=UP000008816;>tr|Q2G245|Q2G245_STAA8 Uncharacterized protein OS=Staphylococcus aureus (strain NCTC 8325) GN=SAOUHSC_01854 PE=
-0.0866166	-0.629811	-0.461431	2	325310000	0.871881	-0.392619	Q2FZA1	>tr|Q2FZA1|Q2FZA1_STAA8 Uncharacterized N-acetyltransferase SAOUHSC_01138 OS=Staphylococcus aureus (strain NCTC 8325) GN=SAOUHSC_01138 PE=3 SV=1 UPId=UP000008816 PPId=UP000008816
0.275618	NaN	-1.05973	4	360380000	0.179151	-0.392053	Q2FXI0	>tr|Q2FXI0|Q2FXI0_STAA8 D-alanine aminotransferase OS=Staphylococcus aureus (strain NCTC 8325) GN=SAOUHSC_01867 PE=3 SV=1 UPId=UP000008816 PPId=UP000008816
-0.772377	-0.826641	0.428771	6	614310000	0.35502	-0.390082	Q2FY79	>sp|Q2FY79|SRRA_STAA8 Transcriptional regulatory protein SrrA OS=Staphylococcus aureus (strain NCTC 8325) GN=srrA PE=3 SV=1 UPId=UP000008816 PPId=UP000008816
0.0789486	-1.21838	-0.0285042	11	1115000000	0.348855	-0.389313	Q2FWA0	>tr|Q2FWA0|Q2FWA0_STAA8 Glutamine--fructose-6-phosphate aminotransferase [isomerizing] OS=Staphylococcus aureus (strain NCTC 8325) GN=glmS PE=3 SV=1 UPId=UP000008816 PPId=UP000008816
-0.347986	-1.1786	0.381925	7	1486100000	0.312957	-0.381554	Q2G227	>sp|Q2G227|DEOB_STAA8 Phosphopentomutase OS=Staphylococcus aureus (strain NCTC 8325) GN=deoB PE=3 SV=1 UPId=UP000008816 PPId=UP000008816
-0.319187	-0.511125	-0.280096	4	1000400000	1.45287	-0.370136	P0A0F8	>sp|P0A0F8|RL15_STAA8 50S ribosomal protein L15 OS=Staphylococcus aureus (strain NCTC 8325) GN=rplO PE=1 SV=1 UPId=UP000008816 PPId=UP000008816
0.0103729	-0.480445	-0.637984	18	12146000000	0.701036	-0.369352	Q2FXQ6	>sp|Q2FXQ6|TIG_STAA8 Trigger factor OS=Staphylococcus aureus (strain NCTC 8325) GN=tig PE=3 SV=1 UPId=UP000008816 PPId=UP000008816
-0.160099	-0.880937	-0.0380879	6	669720000	0.516002	-0.359708	Q2G0P2	>sp|Q2G0P2|NUSG_STAA8 Transcription termination/antitermination protein NusG OS=Staphylococcus aureus (strain NCTC 8325) GN=nusG PE=3 SV=1 UPId=UP000008816 PPId=UP000008816
-0.619614	-0.529428	0.0739699	15	18306000000	0.617037	-0.358357	Q2G0G1	>sp|Q2G0G1|ADH_STAA8 Alcohol dehydrogenase OS=Staphylococcus aureus (strain NCTC 8325) GN=adh PE=3 SV=1 UPId=UP000008816 PPId=UP000008816
-0.261243	-0.603507	-0.201831	12	2524300000	0.979542	-0.355527	Q2G2C1	>tr|Q2G2C1|Q2G2C1_STAA8 Pyruvate carboxylase OS=Staphylococcus aureus (strain NCTC 8325) GN=SAOUHSC_01064 PE=4 SV=1 UPId=UP000008816 PPId=UP000008816
-0.989855	0.298113	NaN	4	208670000	0.163531	-0.345871	G5JM00	>tr|G5JM00|G5JM00_9STAP Cell division protein FtsZ (Fragment) OS=Staphylococcus simiae CCM 7213 GN=SS7213T_12607 PE=3 SV=1 UPId=UP000005413 PPId=UP000008816;>sp|Q2FZ89|FTSZ_STAA8 Cell division protein FtsZ OS=Staphylococcus aureus (strain NCTC 8325) GN=fts
-0.374491	0.00596101	-0.662553	6	475140000	0.66187	-0.343694	Q2FXV9	>sp|Q2FXV9|SYA_STAA8 Alanine--tRNA ligase OS=Staphylococcus aureus (strain NCTC 8325) GN=alaS PE=3 SV=1 UPId=UP000008816 PPId=UP000008816
-0.77228	0.0866562	NaN	4	450110000	0.24326	-0.342812	Q2FWX8	>sp|Q2FWX8|Y2143_STAA8 Uncharacterized protein SAOUHSC_02143 OS=Staphylococcus aureus (strain NCTC 8325) GN=SAOUHSC_02143 PE=3 SV=1 UPId=UP000008816 PPId=UP000008816
0.0499365	-1.19031	0.128748	3	145880000	0.290231	-0.337208	Q2G2D2	>tr|Q2G2D2|Q2G2D2_STAA8 Transcription termination/antitermination protein NusA OS=Staphylococcus aureus (strain NCTC 8325) GN=nusA PE=3 SV=1 UPId=UP000008816 PPId=UP000008816
-0.742043	-0.0109569	-0.225823	10	3843500000	0.566252	-0.326274	Q2FZ27	>sp|Q2FZ27|CODY_STAA8 GTP-sensing transcriptional pleiotropic repressor CodY OS=Staphylococcus aureus (strain NCTC 8325) GN=codY PE=3 SV=1 UPId=UP000008816 PPId=UP000008816
0.0633521	-0.569513	-0.468338	5	2581900000	0.62022	-0.324833	Q2FYG7	>sp|Q2FYG7|NDK_STAA8 Nucleoside diphosphate kinase OS=Staphylococcus aureus (strain NCTC 8325) GN=ndk PE=3 SV=2 UPId=UP000008816 PPId=UP000008816
-0.608296	-0.543673	0.185046	4	3007400000	0.477965	-0.322308	Q2FW33	>sp|Q2FW33|RL17_STAA8 50S ribosomal protein L17 OS=Staphylococcus aureus (strain NCTC 8325) GN=rplQ PE=1 SV=1 UPId=UP000008816 PPId=UP000008816
-1.06039	0.416437	NaN	5	102840000	0.131807	-0.321977	Q2FW81	>sp|Q2FW81|URTF_STAA8 Probable uridylyltransferase SAOUHSC_02423 OS=Staphylococcus aureus (strain NCTC 8325) GN=SAOUHSC_02423 PE=3 SV=1 UPId=UP000008816 PPId=UP000008816
-1.20119	NaN	0.575455	3	71310000	0.105451	-0.312866	Q2FXN4	>tr|Q2FXN4|Q2FXN4_STAA8 Isocitrate dehydrogenase [NADP] OS=Staphylococcus aureus (strain NCTC 8325) GN=SAOUHSC_01801 PE=3 SV=1 UPId=UP000008816 PPId=UP000008816
-0.54616	0.02269	-0.408252	5	566860000	0.674599	-0.310574	A0A0U0	>tr|A0A0U0VQM4|A0A0U0VQM4_STAHA Tryptophanyl-tRNA synthetase%3B proteobacterial type OS=Staphylococcus haemolyticus GN=trpS PE=3 SV=1 UPId=UP000046272 PPId=UP000008816;>tr|Q2FZQ7|Q2FZQ7_STAA8 Tryptophan--tRNA ligase OS=Staphylococcus aureus (strain NCTC 83
-0.481296	0.185988	-0.617239	10	3539300000	0.462042	-0.304182	Q2FZR9	>tr|Q2FZR9|Q2FZR9_STAA8 3-oxoacyl-[acyl-carrier-protein] synthase 2 OS=Staphylococcus aureus (strain NCTC 8325) GN=SAOUHSC_00921 PE=3 SV=1 UPId=UP000008816 PPId=UP000008816
0.153997	-0.372169	-0.675159	6	2551500000	0.463501	-0.297777	Q2G0Z0	>tr|Q2G0Z0|Q2G0Z0_STAA8 Uncharacterized protein OS=Staphylococcus aureus (strain NCTC 8325) GN=SAOUHSC_00371 PE=4 SV=1 UPId=UP000008816 PPId=UP000008816
-0.178186	-0.574175	-0.118372	6	4444300000	0.745827	-0.290244	Q2G113	>sp|Q2G113|RS6_STAA8 30S ribosomal protein S6 OS=Staphylococcus aureus (strain NCTC 8325) GN=rpsF PE=3 SV=1 UPId=UP000008816 PPId=UP000008816
-0.243164	-0.485383	-0.141368	4	575490000	0.979985	-0.289971	Q2G1H0	>tr|Q2G1H0|Q2G1H0_STAA8 Indolepyruvate decarboxylase, putative OS=Staphylococcus aureus (strain NCTC 8325) GN=SAOUHSC_00153 PE=3 SV=1 UPId=UP000008816 PPId=UP000008816
-0.0960346	-0.435061	-0.298308	13	8248500000	0.970981	-0.276468	Q2FXL5	>sp|Q2FXL5|ACKA_STAA8 Acetate kinase OS=Staphylococcus aureus (strain NCTC 8325) GN=ackA PE=3 SV=1 UPId=UP000008816 PPId=UP000008816
-0.26546	-0.571535	0.00817829	8	1458300000	0.618481	-0.276272	Q2FXH2	>sp|Q2FXH2|SYL_STAA8 Leucine--tRNA ligase OS=Staphylococcus aureus (strain NCTC 8325) GN=leuS PE=3 SV=1 UPId=UP000008816 PPId=UP000008816
-0.370972	-0.45291	0.00208685	10	32743000000	0.722219	-0.273932	Q2FYG2	>tr|Q2FYG2|Q2FYG2_STAA8 DNA-binding protein HU, putative OS=Staphylococcus aureus (strain NCTC 8325) GN=SAOUHSC_01490 PE=3 SV=1 UPId=UP000008816 PPId=UP000008816
-0.541473	-0.488306	0.229659	10	2949000000	0.402626	-0.266707	Q2G0M4	>tr|Q2G0M4|Q2G0M4_STAA8 Branched-chain-amino-acid aminotransferase OS=Staphylococcus aureus (strain NCTC 8325) GN=SAOUHSC_00536 PE=3 SV=1 UPId=UP000008816 PPId=UP000008816
-0.0882249	0.306118	-1.00737	5	1561700000	0.245201	-0.263159	Q2FWB8	>tr|Q2FWB8|Q2FWB8_STAA8 Purine nucleoside phosphorylase DeoD-type OS=Staphylococcus aureus (strain NCTC 8325) GN=deoD PE=3 SV=1 UPId=UP000008816 PPId=UP000008816
0.252962	-0.612788	-0.407325	5	5544100000	0.365763	-0.255717	Q2G036	>sp|Q2G036|CLPP_STAA8 ATP-dependent Clp protease proteolytic subunit OS=Staphylococcus aureus (strain NCTC 8325) GN=clpP PE=1 SV=1 UPId=UP000008816 PPId=UP000008816
-0.353946	0.19388	-0.575785	10	1144800000	0.402542	-0.245284	Q2FWF0	>sp|Q2FWF0|ATPB_STAA8 ATP synthase subunit beta OS=Staphylococcus aureus (strain NCTC 8325) GN=atpD PE=3 SV=1 UPId=UP000008816 PPId=UP000008816
-0.0652146	-0.408068	-0.254053	5	758460000	0.871806	-0.242445	Q2G1Z0	>tr|Q2G1Z0|Q2G1Z0_STAA8 Uncharacterized protein OS=Staphylococcus aureus (strain NCTC 8325) GN=SAOUHSC_00655 PE=4 SV=1 UPId=UP000008816 PPId=UP000008816
0.515702	0.196745	-1.43787	5	323390000	0.137829	-0.241808	Q2G2S0	>sp|Q2G2S0|PUR8_STAA8 Adenylosuccinate lyase OS=Staphylococcus aureus (strain NCTC 8325) GN=purB PE=3 SV=1 UPId=UP000008816 PPId=UP000008816
-0.260527	-0.596064	0.149707	9	2497600000	0.410496	-0.235628	Q2G0P0	>sp|Q2G0P0|RL1_STAA8 50S ribosomal protein L1 OS=Staphylococcus aureus (strain NCTC 8325) GN=rplA PE=3 SV=1 UPId=UP000008816 PPId=UP000008816
-0.714244	-0.0173966	0.026532	7	1067800000	0.36593	-0.235036	Q2FW91	>tr|Q2FW91|Q2FW91_STAA8 Arginase OS=Staphylococcus aureus (strain NCTC 8325) GN=SAOUHSC_02409 PE=3 SV=1 UPId=UP000008816 PPId=UP000008816
0.183063	-0.640366	NaN	2	308700000	0.169242	-0.228651	Q2G0J1	>sp|Q2G0J1|Y573_STAA8 Putative heme-dependent peroxidase SAOUHSC_00573 OS=Staphylococcus aureus (strain NCTC 8325) GN=SAOUHSC_00573 PE=3 SV=1 UPId=UP000008816 PPId=UP000008816
-0.0384571	-0.189881	-0.437433	12	5797800000	0.706528	-0.221924	Q2G0J0	>tr|Q2G0J0|Q2G0J0_STAA8 Phosphate acetyltransferase OS=Staphylococcus aureus (strain NCTC 8325) GN=SAOUHSC_00574 PE=4 SV=1 UPId=UP000008816 PPId=UP000008816
0.0855139	-0.254277	-0.494642	3	491520000	0.495757	-0.221135	Q2G0D0	>sp|Q2G0D0|Y675_STAA8 Probable transcriptional regulatory protein SAOUHSC_00675 OS=Staphylococcus aureus (strain NCTC 8325) GN=SAOUHSC_00675 PE=3 SV=1 UPId=UP000008816 PPId=UP000008816
-0.561768	0.122983	NaN	2	472750000	0.19572	-0.219392	Q2G1B9	>tr|Q2G1B9|Q2G1B9_STAA8 Uncharacterized protein OS=Staphylococcus aureus (strain NCTC 8325) GN=SAOUHSC_00226 PE=4 SV=1 UPId=UP000008816 PPId=UP000008816;>tr|Q2G1C4|Q2G1C4_STAA8 Alcohol dehydrogenase, zinc-containing OS=Staphylococcus aureus (strain NCTC 83
-0.290058	-0.0184205	-0.343172	6	1189300000	0.786762	-0.217217	Q2FY40	>tr|Q2FY40|Q2FY40_STAA8 Proline dipeptidase, putative OS=Staphylococcus aureus (strain NCTC 8325) GN=SAOUHSC_01626 PE=3 SV=1 UPId=UP000008816 PPId=UP000008816
0.0505175	-0.48199	NaN	3	495150000	0.246814	-0.215736	Q2FY27	>tr|Q2FY27|Q2FY27_STAA8 Glucokinase, putative OS=Staphylococcus aureus (strain NCTC 8325) GN=SAOUHSC_01646 PE=4 SV=1 UPId=UP000008816 PPId=UP000008816
-0.554504	-0.129934	0.0526991	12	1502600000	0.440927	-0.21058	Q2FXR8	>sp|Q2FXR8|SYV_STAA8 Valine--tRNA ligase OS=Staphylococcus aureus (strain NCTC 8325) GN=valS PE=3 SV=1 UPId=UP000008816 PPId=UP000008816
0.375524	-0.794671	NaN	2	257430000	0.107329	-0.209573	Q2FY61	>tr|Q2FY61|Q2FY61_STAA8 Uncharacterized protein OS=Staphylococcus aureus (strain NCTC 8325) GN=SAOUHSC_01604 PE=4 SV=1 UPId=UP000008816 PPId=UP000008816
0.0891181	-0.658145	-0.0447945	4	1926000000	0.330115	-0.204607	Q2FXT0	>sp|Q2FXT0|RL27_STAA8 50S ribosomal protein L27 OS=Staphylococcus aureus (strain NCTC 8325) GN=rpmA PE=1 SV=1 UPId=UP000008816 PPId=UP000008816
-0.342768	-0.672393	0.408453	7	2996500000	0.22781	-0.202236	Q2G2P2	>tr|Q2G2P2|Q2G2P2_STAA8 Globin domain protein OS=Staphylococcus aureus (strain NCTC 8325) GN=SAOUHSC_00204 PE=3 SV=1 UPId=UP000008816 PPId=UP000008816
-0.497933	NaN	0.0965478	2	8745200	0.206261	-0.200693	Q2FZY9	>sp|Q2FZY9|Y845_STAA8 UPF0337 protein SAOUHSC_00845 OS=Staphylococcus aureus (strain NCTC 8325) GN=SAOUHSC_00845 PE=3 SV=1 UPId=UP000008816 PPId=UP000008816;>tr|C5QT11|C5QT11_9STAP CsbD-like protein OS=Staphylococcus caprae M23864:W1 GN=HMPREF0793_2367 PE=
-0.433022	0.0570406	NaN	6	312850000	0.234049	-0.187991	Q2FYP2	>tr|Q2FYP2|Q2FYP2_STAA8 ABC transporter, ATP-binding protein, putative OS=Staphylococcus aureus (strain NCTC 8325) GN=SAOUHSC_01392 PE=4 SV=1 UPId=UP000008816 PPId=UP000008816
-0.501531	-0.0564236	0.00375945	7	2006200000	0.43647	-0.184732	Q2FW21	>sp|Q2FW21|RL6_STAA8 50S ribosomal protein L6 OS=Staphylococcus aureus (strain NCTC 8325) GN=rplF PE=1 SV=1 UPId=UP000008816 PPId=UP000008816
-0.278226	-0.391521	0.115669	12	12853000000	0.452853	-0.184693	Q2G031	>sp|Q2G031|PGK_STAA8 Phosphoglycerate kinase OS=Staphylococcus aureus (strain NCTC 8325) GN=pgk PE=3 SV=1 UPId=UP000008816 PPId=UP000008816
-0.829818	0.114209	0.17018	6	1903200000	0.199568	-0.18181	P0A0J0	>sp|P0A0J0|SIGA_STAA8 RNA polymerase sigma factor SigA OS=Staphylococcus aureus (strain NCTC 8325) GN=sigA PE=1 SV=1 UPId=UP000008816 PPId=UP000008816
0.0563219	-0.817519	0.217223	5	2108800000	0.200979	-0.181325	Q2FZ45	>sp|Q2FZ45|RS16_STAA8 30S ribosomal protein S16 OS=Staphylococcus aureus (strain NCTC 8325) GN=rpsP PE=3 SV=1 UPId=UP000008816 PPId=UP000008816
-0.280301	-0.485727	0.250946	2	254410000	0.287376	-0.171694	Q2FVT6	>sp|Q2FVT6|HUTI_STAA8 Imidazolonepropionase OS=Staphylococcus aureus (strain NCTC 8325) GN=hutI PE=3 SV=1 UPId=UP000008816 PPId=UP000008816
0.0332439	-0.565955	0.0598656	2	3561700000	0.283057	-0.157615	Q2G055	>sp|Q2G055|HPF_STAA8 Ribosome hibernation promotion factor OS=Staphylococcus aureus (strain NCTC 8325) GN=hpf PE=1 SV=1 UPId=UP000008816 PPId=UP000008816;>tr|A0A0W3BEM7|A0A0W3BEM7_STAHA Fis family transcriptional regulator OS=Staphylococcus haemolyticus GN
-0.744012	0.491634	-0.214242	6	357590000	0.151036	-0.15554	Q2FWP0	>sp|Q2FWP0|LUKL1_STAA8 Uncharacterized leukocidin-like protein 1 OS=Staphylococcus aureus (strain NCTC 8325) GN=SAOUHSC_02241 PE=1 SV=1 UPId=UP000008816 PPId=UP000008816
-0.199926	-0.210185	-0.0486814	5	2663500000	1.00235	-0.152931	P0A0F4	>sp|P0A0F4|RL11_STAA8 50S ribosomal protein L11 OS=Staphylococcus aureus (strain NCTC 8325) GN=rplK PE=3 SV=2 UPId=UP000008816 PPId=UP000008816
1.46027	-1.77978	-0.127566	1	315630000	0.0515608	-0.149023	Q2FYN2	>sp|Q2FYN2|CSPA_STAA8 Cold shock protein CspA OS=Staphylococcus aureus (strain NCTC 8325) GN=cspA PE=1 SV=1 UPId=UP000008816 PPId=UP000008816
-0.539291	-0.0927274	0.194522	6	337120000	0.247901	-0.145832	Q2FVX4	>tr|Q2FVX4|Q2FVX4_STAA8 Molybdenum ABC transporter, periplasmic molybdate-binding protein OS=Staphylococcus aureus (strain NCTC 8325) GN=SAOUHSC_02549 PE=4 SV=1 UPId=UP000008816 PPId=UP000008816
-0.662228	-0.120724	0.354245	6	6129300000	0.170949	-0.142902	Q2G0S0	>tr|Q2G0S0|Q2G0S0_STAA8 50S ribosomal protein L25 OS=Staphylococcus aureus (strain NCTC 8325) GN=rplY PE=1 SV=1 UPId=UP000008816 PPId=UP000008816
0.0524919	-0.331247	NaN	2	141530000	0.221811	-0.139378	Q2G223	>tr|Q2G223|Q2G223_STAA8 Mannose-6-phosphate isomerase, class I OS=Staphylococcus aureus (strain NCTC 8325) GN=SAOUHSC_02976 PE=3 SV=1 UPId=UP000008816 PPId=UP000008816
-0.062498	-0.326014	-0.021981	15	10045000000	0.541206	-0.136831	Q2FZU0	>sp|Q2FZU0|G6PI_STAA8 Glucose-6-phosphate isomerase OS=Staphylococcus aureus (strain NCTC 8325) GN=pgi PE=3 SV=1 UPId=UP000008816 PPId=UP000008816
-0.561128	0.0237026	0.138745	19	8247100000	0.220316	-0.132893	Q2G0Y7	>sp|Q2G0Y7|IMDH_STAA8 Inosine-5-monophosphate dehydrogenase OS=Staphylococcus aureus (strain NCTC 8325) GN=guaB PE=3 SV=1 UPId=UP000008816 PPId=UP000008816
-0.368237	-0.0648233	0.0518937	4	5642900000	0.379847	-0.127055	Q2FW11	>sp|Q2FW11|RL22_STAA8 50S ribosomal protein L22 OS=Staphylococcus aureus (strain NCTC 8325) GN=rplV PE=1 SV=1 UPId=UP000008816 PPId=UP000008816;>sp|Q5HM04|RL22_STAEQ 50S ribosomal protein L22 OS=Staphylococcus epidermidis (strain ATCC 35984 / RP62A) GN=rpl
-0.565108	-0.256863	0.445363	4	534930000	0.145455	-0.125536	Q2FZG9	>sp|Q2FZG9|RNJ1_STAA8 Ribonuclease J 1 OS=Staphylococcus aureus (strain NCTC 8325) GN=rnj1 PE=1 SV=1 UPId=UP000008816 PPId=UP000008816
-0.29095	0.100642	-0.181591	4	226490000	0.398725	-0.123966	Q2G1C8	>tr|Q2G1C8|Q2G1C8_STAA8 Uncharacterized protein OS=Staphylococcus aureus (strain NCTC 8325) GN=SAOUHSC_00197 PE=3 SV=1 UPId=UP000008816 PPId=UP000008816
-0.223838	-0.390725	0.248155	5	777860000	0.230215	-0.122136	Q2G248	>tr|Q2G248|Q2G248_STAA8 Uncharacterized protein OS=Staphylococcus aureus (strain NCTC 8325) GN=SAOUHSC_01852 PE=4 SV=1 UPId=UP000008816 PPId=UP000008816
-1.67256e-05	-0.0237336	-0.29998	16	9228900000	0.421498	-0.10791	Q2FV67	>sp|Q2FV67|ROCA_STAA8 1-pyrroline-5-carboxylate dehydrogenase OS=Staphylococcus aureus (strain NCTC 8325) GN=rocA PE=3 SV=1 UPId=UP000008816 PPId=UP000008816
0.0643169	NaN	-0.270018	4	972620000	0.187845	-0.10285	Q2G2F0	>tr|Q2G2F0|Q2G2F0_STAA8 Uncharacterized protein OS=Staphylococcus aureus (strain NCTC 8325) GN=SAOUHSC_01968 PE=4 SV=1 UPId=UP000008816 PPId=UP000008816
-0.520068	-0.348523	0.562646	3	760540000	0.102291	-0.101982	Q9F0R1	>sp|Q9F0R1|SARR_STAA8 HTH-type transcriptional regulator SarR OS=Staphylococcus aureus (strain NCTC 8325) GN=sarR PE=1 SV=3 UPId=UP000008816 PPId=UP000008816
-0.828195	-0.304991	0.838336	3	501340000	0.0654248	-0.0982835	Q2FXZ3	>sp|Q2FXZ3|DNAJ_STAA8 Chaperone protein DnaJ OS=Staphylococcus aureus (strain NCTC 8325) GN=dnaJ PE=3 SV=1 UPId=UP000008816 PPId=UP000008816
-0.158705	-0.0537044	-0.0677685	7	2341000000	0.978941	-0.0933928	Q2G0N9	>sp|Q2G0N9|RL10_STAA8 50S ribosomal protein L10 OS=Staphylococcus aureus (strain NCTC 8325) GN=rplJ PE=3 SV=1 UPId=UP000008816 PPId=UP000008816
-0.0249927	NaN	-0.14296	2	379410000	0.409138	-0.0839766	P0C818	>sp|P0C818|PSMA4_STAA8 Phenol-soluble modulin alpha 4 peptide OS=Staphylococcus aureus (strain NCTC 8325) GN=psmA4 PE=3 SV=1 UPId=UP000008816 PPId=UP000008816
-0.431212	-0.141008	0.323433	12	5535300000	0.129479	-0.0829291	Q2FWD3	>tr|Q2FWD3|Q2FWD3_STAA8 Uncharacterized protein OS=Staphylococcus aureus (strain NCTC 8325) GN=SAOUHSC_02366 PE=3 SV=1 UPId=UP000008816 PPId=UP000008816
-0.454769	0.0711374	0.159853	15	4802700000	0.133801	-0.0745927	Q2G2A5	>tr|Q2G2A5|Q2G2A5_STAA8 Pyruvate dehydrogenase complex, E1 component, pyruvate dehydrogenase beta subunit, putative OS=Staphylococcus aureus (strain NCTC 8325) GN=SAOUHSC_01041 PE=4 SV=1 UPId=UP000008816 PPId=UP000008816
0.161896	-0.553156	0.181776	8	2135700000	0.0969789	-0.0698282	Q2G041	>tr|Q2G041|Q2G041_STAA8 Thioredoxin reductase OS=Staphylococcus aureus (strain NCTC 8325) GN=SAOUHSC_00785 PE=3 SV=1 UPId=UP000008816 PPId=UP000008816
0.473136	-0.575759	-0.104706	7	794230000	0.0752363	-0.0691096	Q2FXU5	>sp|Q2FXU5|SYD_STAA8 Aspartate--tRNA ligase OS=Staphylococcus aureus (strain NCTC 8325) GN=aspS PE=3 SV=1 UPId=UP000008816 PPId=UP000008816
0.792095	-0.494461	-0.504095	5	429280000	0.0517495	-0.0688202	Q2FZ58	>sp|Q2FZ58|Y1193_STAA8 Uncharacterized protein SAOUHSC_01193 OS=Staphylococcus aureus (strain NCTC 8325) GN=SAOUHSC_01193 PE=3 SV=1 UPId=UP000008816 PPId=UP000008816
-0.450241	0.263104	-0.0081155	15	3861300000	0.105764	-0.065084	Q2G2D8	>tr|Q2G2D8|Q2G2D8_STAA8 ABC transporter, substrate-binding protein, putative OS=Staphylococcus aureus (strain NCTC 8325) GN=SAOUHSC_00634 PE=3 SV=1 UPId=UP000008816 PPId=UP000008816;>tr|A0A0U0VP99|A0A0U0VP99_STAHA ABC transporter substrate-binding protein
0.387205	-0.61737	0.0377302	10	3115800000	0.0717333	-0.0641448	Q2G241	>sp|Q2G241|SYE_STAA8 Glutamate--tRNA ligase OS=Staphylococcus aureus (strain NCTC 8325) GN=gltX PE=3 SV=1 UPId=UP000008816 PPId=UP000008816
-0.73921	0.0965986	0.470577	5	273870000	0.0519123	-0.057345	Q2G071	>tr|Q2G071|Q2G071_STAA8 Uncharacterized protein OS=Staphylococcus aureus (strain NCTC 8325) GN=SAOUHSC_00749 PE=4 SV=1 UPId=UP000008816 PPId=UP000008816
-0.501891	-0.317336	0.655839	5	1003200000	0.0489658	-0.0544626	Q2FV21	>sp|Q2FV21|PANB_STAA8 3-methyl-2-oxobutanoate hydroxymethyltransferase OS=Staphylococcus aureus (strain NCTC 8325) GN=panB PE=3 SV=2 UPId=UP000008816 PPId=UP000008816
-0.875599	0.939496	-0.22702	5	485020000	0.0325518	-0.054374	Q2G193	>tr|Q2G193|Q2G193_STAA8 Uncharacterized protein OS=Staphylococcus aureus (strain NCTC 8325) GN=SAOUHSC_00253 PE=4 SV=1 UPId=UP000008816 PPId=UP000008816;>tr|A0A0H3K6K1|A0A0H3K6K1_STAAE Uncharacterized protein OS=Staphylococcus aureus (strain Newman) GN=NWM
-0.164325	0.0559253	NaN	2	405800000	0.149455	-0.0541999	Q2FXI5	>tr|Q2FXI5|Q2FXI5_STAA8 Uncharacterized protein OS=Staphylococcus aureus (strain NCTC 8325) GN=SAOUHSC_01861 PE=4 SV=1 UPId=UP000008816 PPId=UP000008816
0.0548522	-0.548127	0.358281	21	21107000000	0.0548298	-0.0449982	Q2G028	>sp|Q2G028|ENO_STAA8 Enolase OS=Staphylococcus aureus (strain NCTC 8325) GN=eno PE=1 SV=1 UPId=UP000008816 PPId=UP000008816
-0.149085	-0.292156	0.310742	9	4622000000	0.0792279	-0.0434998	Q2FZJ6	>sp|Q2FZJ6|FOLD_STAA8 Bifunctional protein FolD OS=Staphylococcus aureus (strain NCTC 8325) GN=folD PE=3 SV=1 UPId=UP000008816 PPId=UP000008816
0.281079	-0.414766	0.0061738	16	4825100000	0.0690129	-0.0425047	Q2FY60	>tr|Q2FY60|Q2FY60_STAA8 6-phosphogluconate dehydrogenase, decarboxylating OS=Staphylococcus aureus (strain NCTC 8325) GN=SAOUHSC_01605 PE=3 SV=1 UPId=UP000008816 PPId=UP000008816
-0.0664537	0.0344496	-0.0896819	5	2376600000	0.39949	-0.040562	Q2FVK8	>sp|Q2FVK8|GPMA_STAA8 2,3-bisphosphoglycerate-dependent phosphoglycerate mutase OS=Staphylococcus aureus (strain NCTC 8325) GN=gpmA PE=3 SV=1 UPId=UP000008816 PPId=UP000008816
-0.675553	0.415086	0.15677	9	4194300000	0.0334237	-0.0345655	Q2FZ25	>sp|Q2FZ25|RS2_STAA8 30S ribosomal protein S2 OS=Staphylococcus aureus (strain NCTC 8325) GN=rpsB PE=3 SV=2 UPId=UP000008816 PPId=UP000008816
NaN	0.230249	-0.296067	3	158410000	0.0358349	-0.0329088	Q2G0J8	>tr|Q2G0J8|Q2G0J8_STAA8 Phosphomethylpyrimidine kinase OS=Staphylococcus aureus (strain NCTC 8325) GN=SAOUHSC_00562 PE=4 SV=1 UPId=UP000008816 PPId=UP000008816
-0.124312	-0.249594	0.292292	27	67802000000	0.0538641	-0.0272045	Q2G1X0	>sp|Q2G1X0|HLA_STAA8 Alpha-hemolysin OS=Staphylococcus aureus (strain NCTC 8325) GN=hly PE=1 SV=1 UPId=UP000008816 PPId=UP000008816
-0.140224	0.087025	NaN	2	743100000	0.0687437	-0.0265995	Q2FX05	>tr|Q2FX05|Q2FX05_STAA8 Methionine aminopeptidase OS=Staphylococcus aureus (strain NCTC 8325) GN=map PE=3 SV=1 UPId=UP000008816 PPId=UP000008816
0.347051	-0.0169038	-0.407409	9	9080700000	0.0377759	-0.0257538	Q2FXL6	>sp|Q2FXL6|Y1819_STAA8 Putative universal stress protein SAOUHSC_01819 OS=Staphylococcus aureus (strain NCTC 8325) GN=SAOUHSC_01819 PE=3 SV=1 UPId=UP000008816 PPId=UP000008816
-0.620264	-0.10936	0.65888	2	596600000	0.0199108	-0.0235818	Q2FWB9	>tr|Q2FWB9|Q2FWB9_STAA8 Deoxyribose-phosphate aldolase OS=Staphylococcus aureus (strain NCTC 8325) GN=deoC PE=3 SV=1 UPId=UP000008816 PPId=UP000008816
0.399907	-0.593896	0.153329	6	1367800000	0.0141516	-0.0135533	Q2FZU9	>sp|Q2FZU9|PPI1_STAA8 Putative peptidyl-prolyl cis-trans isomerase OS=Staphylococcus aureus (strain NCTC 8325) GN=SAOUHSC_00891 PE=3 SV=1 UPId=UP000008816 PPId=UP000008816;>sp|Q5HHD1|PPI1_STAAC Putative peptidyl-prolyl cis-trans isomerase OS=Staphylococcus
0.116721	-0.460713	0.315203	6	372750000	0.0128461	-0.00959656	Q2FW07	>sp|Q2FW07|RL4_STAA8 50S ribosomal protein L4 OS=Staphylococcus aureus (strain NCTC 8325) GN=rplD PE=1 SV=1 UPId=UP000008816 PPId=UP000008816
-0.161863	-0.136582	0.298137	5	1209500000	0.000211579	-0.000102838	Q2G2U9	>sp|Q2G2U9|SARA_STAA8 Transcriptional regulator SarA OS=Staphylococcus aureus (strain NCTC 8325) GN=sarA PE=1 SV=3 UPId=UP000008816 PPId=UP000008816
0.314393	0.0722477	-0.331826	13	3814700000	0.0307628	0.0182714	Q2FXE8	>tr|Q2FXE8|Q2FXE8_STAA8 Transaldolase OS=Staphylococcus aureus (strain NCTC 8325) GN=SAOUHSC_01901 PE=4 SV=1 UPId=UP000008816 PPId=UP000008816
0.310786	0.209255	-0.464689	3	110640000	0.0238965	0.0184506	Q2G0B1	>sp|Q2G0B1|MGRA_STAA8 HTH-type transcriptional regulator MgrA OS=Staphylococcus aureus (strain NCTC 8325) GN=mgrA PE=1 SV=3 UPId=UP000008816 PPId=UP000008816
-0.191562	0.230959	NaN	4	483060000	0.0264975	0.0196984	Q2FWB5	>tr|Q2FWB5|Q2FWB5_STAA8 Uncharacterized protein OS=Staphylococcus aureus (strain NCTC 8325) GN=SAOUHSC_02383 PE=4 SV=1 UPId=UP000008816 PPId=UP000008816
-0.303847	-0.139598	0.515031	8	6777100000	0.030261	0.0238619	Q2FXS8	>sp|Q2FXS8|RL21_STAA8 50S ribosomal protein L21 OS=Staphylococcus aureus (strain NCTC 8325) GN=rplU PE=1 SV=1 UPId=UP000008816 PPId=UP000008816
-0.343889	-0.0565768	0.47283	5	2269400000	0.0320438	0.0241214	Q5HLZ8	>sp|Q5HLZ8|RS10_STAEQ 30S ribosomal protein S10 OS=Staphylococcus epidermidis (strain ATCC 35984 / RP62A) GN=rpsJ PE=3 SV=1 UPId=UP000000531 PPId=UP000008816
0.0309477	-0.315488	0.37278	20	23585000000	0.0477451	0.0294132	Q2G0N0	>sp|Q2G0N0|EFTU_STAA8 Elongation factor Tu OS=Staphylococcus aureus (strain NCTC 8325) GN=tuf PE=3 SV=1 UPId=UP000008816 PPId=UP000008816
-0.0733759	-0.119127	0.292496	16	10992000000	0.0851564	0.0333312	Q2G2A3	>tr|Q2G2A3|Q2G2A3_STAA8 Dihydrolipoyl dehydrogenase OS=Staphylococcus aureus (strain NCTC 8325) GN=SAOUHSC_01043 PE=4 SV=1 UPId=UP000008816 PPId=UP000008816
0.158663	-0.507103	0.450551	5	2071900000	0.0384007	0.034037	P0A0J3	>sp|P0A0J3|SODM1_STAA8 Superoxide dismutase [Mn] 1 OS=Staphylococcus aureus (strain NCTC 8325) GN=sodA PE=1 SV=1 UPId=UP000008816 PPId=UP000008816
-0.878937	NaN	0.984311	4	239210000	0.0159073	0.0526872	Q2G0K7	>sp|Q2G0K7|HPS_STAA8 3-hexulose-6-phosphate synthase OS=Staphylococcus aureus (strain NCTC 8325) GN=SAOUHSC_00553 PE=3 SV=1 UPId=UP000008816 PPId=UP000008816;>sp|Q5HRH7|HPS_STAEQ 3-hexulose-6-phosphate synthase OS=Staphylococcus epidermidis (strain ATCC 35
-0.400049	NaN	0.521061	3	385410000	0.0377065	0.0605057	Q2FXK6	>sp|Q2FXK6|RS4_STAA8 30S ribosomal protein S4 OS=Staphylococcus aureus (strain NCTC 8325) GN=rpsD PE=3 SV=1 UPId=UP000008816 PPId=UP000008816
-0.0735762	0.51571	-0.243373	5	1022300000	0.0966823	0.0662536	Q2FW66	>sp|Q2FW66|ASP23_STAA8 Alkaline shock protein 23 OS=Staphylococcus aureus (strain NCTC 8325) GN=asp23 PE=3 SV=1 UPId=UP000008816 PPId=UP000008816
-0.40991	-0.0443366	0.653404	8	2180400000	0.0699809	0.0663858	Q2FV16	>tr|Q2FV16|Q2FV16_STAA8 Probable malate:quinone oxidoreductase OS=Staphylococcus aureus (strain NCTC 8325) GN=mqo PE=3 SV=1 UPId=UP000008816 PPId=UP000008816
0.257358	-0.0439167	-0.0105778	6	2188700000	0.258255	0.0676212	P60430	>sp|P60430|RL2_STAA8 50S ribosomal protein L2 OS=Staphylococcus aureus (strain NCTC 8325) GN=rplB PE=1 SV=1 UPId=UP000008816 PPId=UP000008816
0.471755	-0.248586	-0.0105407	16	4228600000	0.113606	0.0708761	Q2G1C9	>tr|Q2G1C9|Q2G1C9_STAA8 Uncharacterized protein OS=Staphylococcus aureus (strain NCTC 8325) GN=SAOUHSC_00196 PE=3 SV=1 UPId=UP000008816 PPId=UP000008816
NaN	0.350019	-0.205395	2	260300000	0.0768431	0.072312	Q2FXG2	>sp|Q2FXG2|RISB_STAA8 6,7-dimethyl-8-ribityllumazine synthase OS=Staphylococcus aureus (strain NCTC 8325) GN=ribH PE=3 SV=1 UPId=UP000008816 PPId=UP000008816
0.00049361	0.108715	0.110243	11	6466500000	0.740677	0.0731503	Q2G010	>tr|Q2G010|Q2G010_STAA8 Thermonuclease OS=Staphylococcus aureus (strain NCTC 8325) GN=SAOUHSC_00818 PE=4 SV=1 UPId=UP000008816 PPId=UP000008816
0.33309	-0.0673969	-0.0450584	6	1608800000	0.201751	0.0735449	Q2FXM1	>tr|Q2FXM1|Q2FXM1_STAA8 Uncharacterized protein OS=Staphylococcus aureus (strain NCTC 8325) GN=SAOUHSC_01814 PE=3 SV=1 UPId=UP000008816 PPId=UP000008816
-0.250133	0.0674327	0.404972	7	534630000	0.134859	0.0740906	Q2FY66	>tr|Q2FY66|Q2FY66_STAA8 Glucose-6-phosphate 1-dehydrogenase OS=Staphylococcus aureus (strain NCTC 8325) GN=zwf PE=3 SV=1 UPId=UP000008816 PPId=UP000008816
-0.170735	0.74769	-0.351905	4	441840000	0.0726204	0.0750167	A0A0U0	>tr|A0A0U0VKA9|A0A0U0VKA9_STAHA Dihydrolipoamide succinyltransferase E2 component of 2-oxoglutarate dehydrogenase complex OS=Staphylococcus haemolyticus GN=odhB PE=3 SV=1 UPId=UP000046272 PPId=UP000008816;>sp|Q2FYM2|ODO2_STAA8 Dihydrolipoyllysine-residue s
0.224482	-0.357814	0.363309	13	5173600000	0.118225	0.0766591	Q2FYF9	>tr|Q2FYF9|Q2FYF9_STAA8 30S ribosomal protein S1, putative OS=Staphylococcus aureus (strain NCTC 8325) GN=SAOUHSC_01493 PE=4 SV=1 UPId=UP000008816 PPId=UP000008816
0.257724	-0.03187	0.00576543	6	2388300000	0.314099	0.0772066	Q2FX94	>tr|Q2FX94|Q2FX94_STAA8 Fumarate hydratase class II OS=Staphylococcus aureus (strain NCTC 8325) GN=fumC PE=3 SV=1 UPId=UP000008816 PPId=UP000008816
0.0461001	-0.0197101	0.225322	4	266420000	0.431297	0.083904	Q2G0Z2	>tr|Q2G0Z2|Q2G0Z2_STAA8 Uncharacterized protein OS=Staphylococcus aureus (strain NCTC 8325) GN=SAOUHSC_00369 PE=4 SV=1 UPId=UP000008816 PPId=UP000008816;>tr|A0A0U1MHU4|A0A0U1MHU4_STAAU Uncharacterized protein OS=Staphylococcus aureus GN=BN1326_30254 PE=4 S
0.132889	-0.300081	0.425573	11	2424100000	0.14121	0.0861271	O05204	>sp|O05204|AHPF_STAA8 Alkyl hydroperoxide reductase subunit F OS=Staphylococcus aureus (strain NCTC 8325) GN=ahpF PE=3 SV=1 UPId=UP000008816 PPId=UP000008816
0.00892396	-0.26832	0.520744	23	22159000000	0.12933	0.0871158	Q2FV17	>sp|Q2FV17|ALF1_STAA8 Fructose-bisphosphate aldolase class 1 OS=Staphylococcus aureus (strain NCTC 8325) GN=fda PE=3 SV=1 UPId=UP000008816 PPId=UP000008816
-0.00249086	-0.367545	0.637535	4	1619600000	0.1023	0.0891664	Q2FZH6	>tr|Q2FZH6|Q2FZH6_STAA8 Phosphocarrier protein hpr, putative OS=Staphylococcus aureus (strain NCTC 8325) GN=SAOUHSC_01028 PE=4 SV=1 UPId=UP000008816 PPId=UP000008816
0.222857	-0.300204	0.348768	3	7524100000	0.158944	0.0904736	Q2FZZ8	>sp|Q2FZZ8|GCSH_STAA8 Glycine cleavage system H protein OS=Staphylococcus aureus (strain NCTC 8325) GN=gcvH PE=3 SV=1 UPId=UP000008816 PPId=UP000008816
0.0864727	-0.0480045	0.257209	4	1262300000	0.419621	0.0985591	Q2FXW7	>sp|Q2FXW7|GREA_STAA8 Transcription elongation factor GreA OS=Staphylococcus aureus (strain NCTC 8325) GN=greA PE=3 SV=1 UPId=UP000008816 PPId=UP000008816
-0.090558	0.274693	0.111789	8	1198600000	0.347735	0.0986413	Q2FZD2	>sp|Q2FZD2|THIO_STAA8 Thioredoxin OS=Staphylococcus aureus (strain NCTC 8325) GN=trxA PE=2 SV=1 UPId=UP000008816 PPId=UP000008816
-1.50512	0.633181	1.16826	3	579350000	0.038679	0.0987753	Q2FZA4	>tr|Q2FZA4|Q2FZA4_STAA8 Uncharacterized protein OS=Staphylococcus aureus (strain NCTC 8325) GN=SAOUHSC_01135 PE=4 SV=1 UPId=UP000008816 PPId=UP000008816
-0.00300186	-0.224144	0.52961	7	5601300000	0.157172	0.100821	Q2FWZ8	>sp|Q2FWZ8|FTN_STAA8 Bacterial non-heme ferritin OS=Staphylococcus aureus (strain NCTC 8325) GN=ftnA PE=1 SV=1 UPId=UP000008816 PPId=UP000008816
0.0971952	-0.0989609	0.307256	18	10889000000	0.321654	0.10183	Q2G0N1	>sp|Q2G0N1|EFG_STAA8 Elongation factor G OS=Staphylococcus aureus (strain NCTC 8325) GN=fusA PE=1 SV=3 UPId=UP000008816 PPId=UP000008816
0.768272	-0.552019	NaN	2	215630000	0.0473797	0.108126	A0A0H3	>tr|A0A0H3JQG5|A0A0H3JQG5_STAAM Probable autolysin (N-acetylmuramoyl-L-alanine amidase) OS=Staphylococcus aureus (strain Mu50 / ATCC 700699) GN=SAV0465 PE=4 SV=1 UPId=UP000002481 PPId=UP000008816;>sp|Q2G0U9|SLE1_STAA8 N-acetylmuramoyl-L-alanine amidase sle
-0.549714	0.0443827	0.831137	3	351960000	0.0907548	0.108602	Q2FZT7	>tr|Q2FZT7|Q2FZT7_STAA8 Signal peptidase I OS=Staphylococcus aureus (strain NCTC 8325) GN=SAOUHSC_00903 PE=3 SV=1 UPId=UP000008816 PPId=UP000008816
-0.501081	NaN	0.746441	3	237490000	0.0573132	0.12268	Q2FZD9	>sp|Q2FZD9|SYFA_STAA8 Phenylalanine--tRNA ligase alpha subunit OS=Staphylococcus aureus (strain NCTC 8325) GN=pheS PE=3 SV=1 UPId=UP000008816 PPId=UP000008816
0.133457	NaN	0.120512	2	992130000	1.48919	0.126985	Q2FZU7	>tr|Q2FZU7|Q2FZU7_STAA8 FMN oxidoreductase, putative OS=Staphylococcus aureus (strain NCTC 8325) GN=SAOUHSC_00893 PE=4 SV=1 UPId=UP000008816 PPId=UP000008816
1.21346	-0.95757	NaN	2	557800000	0.0337137	0.127947	Q2G2Y4	>tr|Q2G2Y4|Q2G2Y4_STAA8 Uncharacterized protein OS=Staphylococcus aureus (strain NCTC 8325) GN=SAOUHSC_01918 PE=4 SV=1 UPId=UP000008816 PPId=UP000008816
0.188663	NaN	0.0679276	1	42463000	0.552865	0.128295	G5JMD0	>tr|G5JMD0|G5JMD0_9STAP Uncharacterized protein (Fragment) OS=Staphylococcus simiae CCM 7213 GN=SS7213T_13287 PE=4 SV=1 UPId=UP000005413 PPId=UP000008816;>tr|Q2G2S8|Q2G2S8_STAA8 Uncharacterized protein OS=Staphylococcus aureus (strain NCTC 8325) GN=SAOUHSC
0.0808696	0.0759477	0.230837	9	1236300000	0.899223	0.129218	Q2G124	>sp|Q2G124|THLA_STAA8 Probable acetyl-CoA acyltransferase OS=Staphylococcus aureus (strain NCTC 8325) GN=SAOUHSC_00336 PE=3 SV=1 UPId=UP000008816 PPId=UP000008816
0.0906123	-0.0863884	0.391672	12	3727000000	0.35249	0.131965	Q2FXH9	>sp|Q2FXH9|PEPVL_STAA8 Putative dipeptidase SAOUHSC_01868 OS=Staphylococcus aureus (strain NCTC 8325) GN=SAOUHSC_01868 PE=3 SV=1 UPId=UP000008816 PPId=UP000008816
0.402019	-0.22162	0.243394	7	606390000	0.276465	0.141264	Q2G295	>tr|Q2G295|Q2G295_STAA8 Catabolite control protein A OS=Staphylococcus aureus (strain NCTC 8325) GN=SAOUHSC_01850 PE=4 SV=1 UPId=UP000008816 PPId=UP000008816
0.106857	-0.1629	0.481185	11	4756600000	0.278043	0.141714	Q2G0Q8	>tr|Q2G0Q8|Q2G0Q8_STAA8 Cysteine synthase OS=Staphylococcus aureus (strain NCTC 8325) GN=SAOUHSC_00488 PE=3 SV=1 UPId=UP000008816 PPId=UP000008816
-0.129391	0.42857	NaN	2	136700000	0.163256	0.14959	Q2FXA3	>sp|Q2FXA3|DCUP_STAA8 Uroporphyrinogen decarboxylase OS=Staphylococcus aureus (strain NCTC 8325) GN=hemE PE=3 SV=1 UPId=UP000008816 PPId=UP000008816
0.310065	-0.0248353	0.168379	15	5405700000	0.585726	0.151203	Q2FZU5	>tr|Q2FZU5|Q2FZU5_STAA8 Glutamate dehydrogenase OS=Staphylococcus aureus (strain NCTC 8325) GN=SAOUHSC_00895 PE=3 SV=1 UPId=UP000008816 PPId=UP000008816
0.108344	0.0308208	0.333591	17	2937100000	0.64821	0.157585	Q2FYS9	>tr|Q2FYS9|Q2FYS9_STAA8 Aconitate hydratase OS=Staphylococcus aureus (strain NCTC 8325) GN=SAOUHSC_01347 PE=3 SV=1 UPId=UP000008816 PPId=UP000008816
0.154336	0.110914	0.20886	6	1560400000	1.51322	0.158036	Q2FZT4	>sp|Q2FZT4|Y906_STAA8 Uncharacterized protein SAOUHSC_00906 OS=Staphylococcus aureus (strain NCTC 8325) GN=SAOUHSC_00906 PE=3 SV=1 UPId=UP000008816 PPId=UP000008816
0.484512	NaN	-0.156164	4	424910000	0.155836	0.164174	Q2FXK7	>tr|Q2FXK7|Q2FXK7_STAA8 GAF domain protein OS=Staphylococcus aureus (strain NCTC 8325) GN=SAOUHSC_01828 PE=4 SV=1 UPId=UP000008816 PPId=UP000008816
0.119459	-0.0241516	0.412061	10	1131800000	0.497157	0.169123	Q2FY35	>sp|Q2FY35|GCSPB_STAA8 Probable glycine dehydrogenase (decarboxylating) subunit 2 OS=Staphylococcus aureus (strain NCTC 8325) GN=gcvPB PE=3 SV=1 UPId=UP000008816 PPId=UP000008816
0.567554	-0.526516	0.47701	2	1184300000	0.173225	0.172683	Q2FW08	>sp|Q2FW08|RL23_STAA8 50S ribosomal protein L23 OS=Staphylococcus aureus (strain NCTC 8325) GN=rplW PE=1 SV=1 UPId=UP000008816 PPId=UP000008816
-0.132849	0.492627	NaN	3	401050000	0.175424	0.179889	Q2FWJ3	>sp|Q2FWJ3|RSBW_STAA8 Serine-protein kinase RsbW OS=Staphylococcus aureus (strain NCTC 8325) GN=rsbW PE=3 SV=2 UPId=UP000008816 PPId=UP000008816
0.46311	0.235922	-0.157296	16	8181900000	0.372618	0.180579	Q2FYT8	>tr|Q2FYT8|Q2FYT8_STAA8 Transketolase OS=Staphylococcus aureus (strain NCTC 8325) GN=SAOUHSC_01337 PE=3 SV=1 UPId=UP000008816 PPId=UP000008816
0.137733	-0.00441469	0.418088	10	5062200000	0.557808	0.183802	Q2FZH5	>tr|Q2FZH5|Q2FZH5_STAA8 Phosphoenolpyruvate-protein phosphotransferase OS=Staphylococcus aureus (strain NCTC 8325) GN=SAOUHSC_01029 PE=3 SV=1 UPId=UP000008816 PPId=UP000008816
0.539855	-0.127122	0.141489	2	4342700000	0.355592	0.18474	Q2G2M0	>tr|Q2G2M0|Q2G2M0_STAA8 Tautomerase OS=Staphylococcus aureus (strain NCTC 8325) GN=SAOUHSC_01362 PE=3 SV=1 UPId=UP000008816 PPId=UP000008816;>tr|A0A0M2NPE7|A0A0M2NPE7_9STAP Tautomerase OS=Staphylococcus pasteuri GN=UF70_0941 PE=3 SV=1 UPId=UP000034266 PPId
-0.215045	0.0262143	0.749695	2	948380000	0.232808	0.186955	Q2FXM0	>sp|Q2FXM0|Y1815_STAA8 UPF0173 metal-dependent hydrolase SAOUHSC_01815 OS=Staphylococcus aureus (strain NCTC 8325) GN=SAOUHSC_01815 PE=3 SV=1 UPId=UP000008816 PPId=UP000008816
0.434959	-0.200696	0.351641	3	425520000	0.365777	0.195302	Q2FV14	>tr|Q2FV14|Q2FV14_STAA8 Acetyl-CoA synthetase, putative OS=Staphylococcus aureus (strain NCTC 8325) GN=SAOUHSC_02929 PE=4 SV=1 UPId=UP000008816 PPId=UP000008816;>tr|A0A0E1XL82|A0A0E1XL82_STAAU AMP-binding enzyme OS=Staphylococcus aureus subsp. aureus MN8 G
0.140379	0.551047	-0.105282	4	766160000	0.38213	0.195381	Q2FYS0	>tr|Q2FYS0|Q2FYS0_STAA8 Uncharacterized protein OS=Staphylococcus aureus (strain NCTC 8325) GN=SAOUHSC_01365 PE=4 SV=1 UPId=UP000008816 PPId=UP000008816
-0.472759	0.278198	0.82132	9	3383700000	0.198173	0.20892	Q2FW18	>sp|Q2FW18|RL5_STAA8 50S ribosomal protein L5 OS=Staphylococcus aureus (strain NCTC 8325) GN=rplE PE=1 SV=1 UPId=UP000008816 PPId=UP000008816
0.16445	-0.0776317	0.551985	6	2562900000	0.437238	0.212934	Q2G0M7	>sp|Q2G0M7|HCHA_STAA8 Protein deglycase HchA OS=Staphylococcus aureus (strain NCTC 8325) GN=hchA PE=3 SV=1 UPId=UP000008816 PPId=UP000008816;>tr|A0A0U0VQ09|A0A0U0VQ09_STAHA Chaperone protein hchA OS=Staphylococcus haemolyticus GN=hchA PE=4 SV=1 UPId=UP0000
0.507844	0.504186	-0.341313	7	767580000	0.291083	0.223572	Q2FVL2	>tr|Q2FVL2|Q2FVL2_STAA8 Uncharacterized protein OS=Staphylococcus aureus (strain NCTC 8325) GN=SAOUHSC_02699 PE=4 SV=1 UPId=UP000008816 PPId=UP000008816
-0.336611	0.16113	0.870965	3	237830000	0.2394	0.231828	Q2FXP9	>sp|Q2FXP9|IF3_STAA8 Translation initiation factor IF-3 OS=Staphylococcus aureus (strain NCTC 8325) GN=infC PE=3 SV=1 UPId=UP000008816 PPId=UP000008816
-0.0524088	0.259585	0.515984	6	1310800000	0.552668	0.241053	Q2FY34	>sp|Q2FY34|GCSPA_STAA8 Probable glycine dehydrogenase (decarboxylating) subunit 1 OS=Staphylococcus aureus (strain NCTC 8325) GN=gcvPA PE=3 SV=1 UPId=UP000008816 PPId=UP000008816
-0.0952689	0.343139	0.479259	2	657340000	0.527386	0.242377	Q2G000	>tr|Q2G000|Q2G000_STAA8 Thioredoxin, putative OS=Staphylococcus aureus (strain NCTC 8325) GN=SAOUHSC_00834 PE=1 SV=1 UPId=UP000008816 PPId=UP000008816
0.0909187	-0.0592213	0.71134	4	523370000	0.393813	0.247679	Q2G045	>sp|Q2G045|HPRK_STAA8 HPr kinase/phosphorylase OS=Staphylococcus aureus (strain NCTC 8325) GN=hprK PE=3 SV=1 UPId=UP000008816 PPId=UP000008816
0.252596	0.0792744	0.413077	29	18858000000	0.908726	0.248316	Q2FUU5	>sp|Q2FUU5|LIP1_STAA8 Lipase 1 OS=Staphylococcus aureus (strain NCTC 8325) GN=lipA PE=1 SV=1 UPId=UP000008816 PPId=UP000008816
0.599386	0.848584	-0.698212	6	538360000	0.1843	0.249919	Q2FZV7	>sp|Q2FZV7|Y878_STAA8 NADH dehydrogenase-like protein SAOUHSC_00878 OS=Staphylococcus aureus (strain NCTC 8325) GN=SAOUHSC_00878 PE=1 SV=1 UPId=UP000008816 PPId=UP000008816
0.390738	0.547138	-0.17766	10	4092600000	0.433152	0.253405	Q2FYU7	>sp|Q2FYU7|CATA_STAA8 Catalase OS=Staphylococcus aureus (strain NCTC 8325) GN=katA PE=2 SV=2 UPId=UP000008816 PPId=UP000008816
0.714989	-0.57026	0.617896	2	268360000	0.221071	0.254208	Q2FXQ1	>sp|Q2FXQ1|RL20_STAA8 50S ribosomal protein L20 OS=Staphylococcus aureus (strain NCTC 8325) GN=rplT PE=1 SV=1 UPId=UP000008816 PPId=UP000008816
0.507502	0.00705341	0.277293	10	2880200000	0.678748	0.263949	Q2FZW6	>sp|Q2FZW6|DLTA_STAA8 D-alanine--poly(phosphoribitol) ligase subunit 1 OS=Staphylococcus aureus (strain NCTC 8325) GN=dltA PE=3 SV=1 UPId=UP000008816 PPId=UP000008816
0.0252201	0.00855981	0.819874	7	1322000000	0.398832	0.284551	Q2FWD1	>sp|Q2FWD1|PYRG_STAA8 CTP synthase OS=Staphylococcus aureus (strain NCTC 8325) GN=pyrG PE=3 SV=1 UPId=UP000008816 PPId=UP000008816
0.602054	0.937735	-0.68414	10	2439700000	0.206065	0.285216	Q2FVK3	>tr|Q2FVK3|Q2FVK3_STAA8 Gamma-hemolysin h-gamma-ii subunit, putative OS=Staphylococcus aureus (strain NCTC 8325) GN=SAOUHSC_02708 PE=4 SV=1 UPId=UP000008816 PPId=UP000008816
0.189632	-0.0941591	0.773549	2	746460000	0.426662	0.289674	Q2FYQ2	>tr|Q2FYQ2|Q2FYQ2_STAA8 Uncharacterized protein OS=Staphylococcus aureus (strain NCTC 8325) GN=SAOUHSC_01383 PE=4 SV=1 UPId=UP000008816 PPId=UP000008816
0.0914549	0.327269	0.461548	12	5710700000	0.945886	0.293424	Q2G0M8	>tr|Q2G0M8|Q2G0M8_STAA8 Uncharacterized protein OS=Staphylococcus aureus (strain NCTC 8325) GN=SAOUHSC_00532 PE=3 SV=1 UPId=UP000008816 PPId=UP000008816
0.0888113	0.262752	0.559514	2	542660000	0.802198	0.303693	Q2FWF5	>sp|Q2FWF5|FABZ_STAA8 3-hydroxyacyl-[acyl-carrier-protein] dehydratase FabZ OS=Staphylococcus aureus (strain NCTC 8325) GN=fabZ PE=3 SV=1 UPId=UP000008816 PPId=UP000008816
-0.0311248	0.376386	0.591009	10	1755400000	0.639613	0.31209	Q2FZG6	>tr|Q2FZG6|Q2FZG6_STAA8 Peptide deformylase OS=Staphylococcus aureus (strain NCTC 8325) GN=def PE=3 SV=1 UPId=UP000008816 PPId=UP000008816
0.970997	-0.183613	0.152194	2	320220000	0.33965	0.313193	Q2FYK7	>tr|Q2FYK7|Q2FYK7_STAA8 Uncharacterized protein OS=Staphylococcus aureus (strain NCTC 8325) GN=SAOUHSC_01433 PE=4 SV=1 UPId=UP000008816 PPId=UP000008816;>tr|A0A0T7MUH5|A0A0T7MUH5_STAAU DegV domain-containing protein OS=Staphylococcus aureus GN=ERS179246_01
0.750703	0.121157	0.0800011	2	3516500000	0.55089	0.317287	Q2G1W1	>tr|Q2G1W1|Q2G1W1_STAA8 Secretory antigen SsaA, putative OS=Staphylococcus aureus (strain NCTC 8325) GN=SAOUHSC_02576 PE=4 SV=1 UPId=UP000008816 PPId=UP000008816
0.447149	0.242648	0.264489	16	5698100000	1.40759	0.318096	Q2G1U3	>tr|Q2G1U3|Q2G1U3_STAA8 Oligoendopeptidase F OS=Staphylococcus aureus (strain NCTC 8325) GN=SAOUHSC_00937 PE=4 SV=1 UPId=UP000008816 PPId=UP000008816
-0.471376	0.230249	1.19596	6	770450000	0.238163	0.318278	Q2FVB2	>sp|Q2FVB2|F16PC_STAA8 Fructose-1,6-bisphosphatase class 3 OS=Staphylococcus aureus (strain NCTC 8325) GN=fbp PE=3 SV=1 UPId=UP000008816 PPId=UP000008816
0.528648	0.579273	-0.14829	11	3352000000	0.514526	0.319877	Q2FZ82	>sp|Q2FZ82|SYI_STAA8 Isoleucine--tRNA ligase OS=Staphylococcus aureus (strain NCTC 8325) GN=ileS PE=3 SV=1 UPId=UP000008816 PPId=UP000008816
0.70106	-0.153884	0.430206	5	965010000	0.487236	0.325794	Q2FWZ0	>sp|Q2FWZ0|GATB_STAA8 Aspartyl/glutamyl-tRNA(Asn/Gln) amidotransferase subunit B OS=Staphylococcus aureus (strain NCTC 8325) GN=gatB PE=3 SV=1 UPId=UP000008816 PPId=UP000008816
0.248928	-0.0461318	0.787604	3	1390400000	0.510294	0.330133	Q2FY42	>tr|Q2FY42|Q2FY42_STAA8 Acetyl-CoA carboxylase, biotin carboxyl carrier protein OS=Staphylococcus aureus (strain NCTC 8325) GN=SAOUHSC_01624 PE=4 SV=1 UPId=UP000008816 PPId=UP000008816
0.208082	0.0711374	0.714329	11	2070900000	0.633544	0.331183	Q2FVW9	>tr|Q2FVW9|Q2FVW9_STAA8 Uncharacterized protein OS=Staphylococcus aureus (strain NCTC 8325) GN=SAOUHSC_02554 PE=1 SV=1 UPId=UP000008816 PPId=UP000008816
0.434262	0.182755	0.390913	8	1577900000	1.30579	0.335977	Q2FWE8	>sp|Q2FWE8|ATPA_STAA8 ATP synthase subunit alpha OS=Staphylococcus aureus (strain NCTC 8325) GN=atpA PE=3 SV=1 UPId=UP000008816 PPId=UP000008816
0.0917229	-0.0805999	1.0147	7	745210000	0.376232	0.341941	Q2G0W9	>sp|Q2G0W9|Y405_STAA8 Uncharacterized lipoprotein SAOUHSC_00405 OS=Staphylococcus aureus (strain NCTC 8325) GN=SAOUHSC_00405 PE=3 SV=2 UPId=UP000008816 PPId=UP000008816
0.658954	NaN	0.0330198	3	286650000	0.329637	0.345987	Q2G253	>tr|Q2G253|Q2G253_STAA8 Uncharacterized protein OS=Staphylococcus aureus (strain NCTC 8325) GN=SAOUHSC_00025 PE=3 SV=1 UPId=UP000008816 PPId=UP000008816
0.0562057	-0.243588	1.26558	4	816450000	0.286127	0.3594	Q2FXI8	>tr|Q2FXI8|Q2FXI8_STAA8 Uncharacterized protein OS=Staphylococcus aureus (strain NCTC 8325) GN=SAOUHSC_01858 PE=4 SV=1 UPId=UP000008816 PPId=UP000008816
0.660595	NaN	0.0786215	3	173760000	0.372034	0.369608	Q2G1F2	>sp|Q2G1F2|AZOR_STAA8 FMN-dependent NADH-azoreductase OS=Staphylococcus aureus (strain NCTC 8325) GN=azoR PE=3 SV=1 UPId=UP000008816 PPId=UP000008816;>tr|A0A0U0VRE5|A0A0U0VRE5_STAHA FMN-dependent NADH-azoreductase OS=Staphylococcus haemolyticus GN=azoR PE=
0.599052	0.263456	0.249671	14	5963200000	1.07957	0.370726	Q2FYY6	>tr|Q2FYY6|Q2FYY6_STAA8 Glutamine synthetase OS=Staphylococcus aureus (strain NCTC 8325) GN=SAOUHSC_01287 PE=3 SV=1 UPId=UP000008816 PPId=UP000008816;>sp|Q5HPN2|GLNA_STAEQ Glutamine synthetase OS=Staphylococcus epidermidis (strain ATCC 35984 / RP62A) GN=gl
0.886183	-0.178582	0.405301	1	290850000	0.454158	0.370967	Q2G1Y7	>tr|Q2G1Y7|Q2G1Y7_STAA8 Uncharacterized protein OS=Staphylococcus aureus (strain NCTC 8325) GN=SAOUHSC_01061 PE=4 SV=1 UPId=UP000008816 PPId=UP000008816
0.18993	0.271536	0.687024	6	1732200000	0.883775	0.38283	Q2FZ55	>sp|Q2FZ55|PLSX_STAA8 Phosphate acyltransferase OS=Staphylococcus aureus (strain NCTC 8325) GN=plsX PE=3 SV=1 UPId=UP000008816 PPId=UP000008816
0.0302858	1.37692	-0.211343	5	2234700000	0.297148	0.398622	Q2FYL0	>tr|Q2FYL0|Q2FYL0_STAA8 Phosphotransferase system enzyme IIA, putative OS=Staphylococcus aureus (strain NCTC 8325) GN=SAOUHSC_01430 PE=4 SV=1 UPId=UP000008816 PPId=UP000008816
0.16974	0.00603624	1.03399	8	2497700000	0.47699	0.403256	Q2FXL3	>tr|Q2FXL3|Q2FXL3_STAA8 Probable thiol peroxidase OS=Staphylococcus aureus (strain NCTC 8325) GN=tpx PE=1 SV=1 UPId=UP000008816 PPId=UP000008816
-0.00406273	0.418799	0.837761	12	5364100000	0.642189	0.417499	Q2FZ37	>sp|Q2FZ37|SUCC_STAA8 Succinyl-CoA ligase [ADP-forming] subunit beta OS=Staphylococcus aureus (strain NCTC 8325) GN=sucC PE=3 SV=1 UPId=UP000008816 PPId=UP000008816
0.421679	0.423182	NaN	2	269990000	2.94572	0.42243	Q2FWD0	>sp|Q2FWD0|RPOE_STAA8 Probable DNA-directed RNA polymerase subunit delta OS=Staphylococcus aureus (strain NCTC 8325) GN=rpoE PE=3 SV=1 UPId=UP000008816 PPId=UP000008816
0.631937	0.0447557	0.59411	4	1107900000	0.80904	0.423601	Q2FZS0	>sp|Q2FZS0|FABH_STAA8 3-oxoacyl-[acyl-carrier-protein] synthase 3 OS=Staphylococcus aureus (strain NCTC 8325) GN=fabH PE=3 SV=1 UPId=UP000008816 PPId=UP000008816
-0.0492641	0.528837	0.818716	2	349030000	0.63465	0.432763	Q2FZ48	>tr|Q2FZ48|Q2FZ48_STAA8 Signal recognition particle receptor FtsY OS=Staphylococcus aureus (strain NCTC 8325) GN=ftsY PE=3 SV=1 UPId=UP000008816 PPId=UP000008816
-0.0321941	NaN	0.92379	4	219560000	0.282182	0.445798	Q2FYF3	>tr|Q2FYF3|Q2FYF3_STAA8 Uncharacterized protein OS=Staphylococcus aureus (strain NCTC 8325) GN=SAOUHSC_01499 PE=4 SV=1 UPId=UP000008816 PPId=UP000008816
0.105254	NaN	0.790816	3	155400000	0.381154	0.448035	Q2FZG8	>sp|Q2FZG8|Y1036_STAA8 UPF0356 protein SAOUHSC_01036 OS=Staphylococcus aureus (strain NCTC 8325) GN=SAOUHSC_01036 PE=3 SV=1 UPId=UP000008816 PPId=UP000008816
0.113829	0.804416	NaN	2	374760000	0.386677	0.459123	Q2G0G6	>tr|Q2G0G6|Q2G0G6_STAA8 Uncharacterized protein OS=Staphylococcus aureus (strain NCTC 8325) GN=SAOUHSC_00603 PE=4 SV=1 UPId=UP000008816 PPId=UP000008816
-0.068733	1.01619	NaN	1	459960000	0.265205	0.47373	Q5HQM1	>sp|Q5HQM1|Y527_STAEQ NADH dehydrogenase-like protein SERP0527 OS=Staphylococcus epidermidis (strain ATCC 35984 / RP62A) GN=SERP0527 PE=3 SV=1 UPId=UP000000531 PPId=UP000008816
0.162835	0.668377	0.639064	4	933640000	1.01794	0.490092	Q2FWB7	>tr|Q2FWB7|Q2FWB7_STAA8 Uncharacterized protein OS=Staphylococcus aureus (strain NCTC 8325) GN=SAOUHSC_02381 PE=3 SV=1 UPId=UP000008816 PPId=UP000008816
0.71822	0.382183	0.420443	3	363460000	1.38509	0.506949	Q2FY59	>tr|Q2FY59|Q2FY59_STAA8 Peptidase T, putative OS=Staphylococcus aureus (strain NCTC 8325) GN=SAOUHSC_01606 PE=4 SV=1 UPId=UP000008816 PPId=UP000008816
1.11734	-0.0909096	NaN	3	261850000	0.25831	0.513216	Q2FX98	>tr|Q2FX98|Q2FX98_STAA8 Uncharacterized protein OS=Staphylococcus aureus (strain NCTC 8325) GN=SAOUHSC_01979 PE=4 SV=1 UPId=UP000008816 PPId=UP000008816
0.220971	0.704495	0.637229	12	1756400000	1.12538	0.520898	Q2FXL7	>sp|Q2FXL7|DHA2_STAA8 Alanine dehydrogenase 2 OS=Staphylococcus aureus (strain NCTC 8325) GN=ald2 PE=3 SV=1 UPId=UP000008816 PPId=UP000008816;>tr|A0A0U0VSF6|A0A0U0VSF6_STAHA Alanine dehydrogenase OS=Staphylococcus haemolyticus GN=ald2 PE=4 SV=1 UPId=UP0000
-0.21696	NaN	1.28219	2	341120000	0.217018	0.532617	Q2G0Z9	>tr|Q2G0Z9|Q2G0Z9_STAA8 Uncharacterized protein OS=Staphylococcus aureus (strain NCTC 8325) GN=SAOUHSC_00362 PE=4 SV=1 UPId=UP000008816 PPId=UP000008816
0.470718	0.602471	NaN	3	289590000	1.1092	0.536595	Q2G0S3	>sp|Q2G0S3|GLMU_STAA8 Bifunctional protein GlmU OS=Staphylococcus aureus (strain NCTC 8325) GN=glmU PE=3 SV=1 UPId=UP000008816 PPId=UP000008816
-1.05668	1.63882	1.03426	4	1169400000	0.238675	0.538801	Q2G0X2	>tr|Q2G0X2|Q2G0X2_STAA8 Uncharacterized protein OS=Staphylococcus aureus (strain NCTC 8325) GN=SAOUHSC_00401 PE=4 SV=1 UPId=UP000008816 PPId=UP000008816
0.6861	1.02596	-0.0859368	3	415940000	0.617682	0.54204	Q2G1M1	>tr|Q2G1M1|Q2G1M1_STAA8 3-ketoacyl-acyl carrier protein reductase, putative OS=Staphylococcus aureus (strain NCTC 8325) GN=SAOUHSC_00086 PE=4 SV=1 UPId=UP000008816 PPId=UP000008816
0.714019	0.272589	0.68069	25	3339600000	1.22586	0.555766	Q2FXM9	>sp|Q2FXM9|KPYK_STAA8 Pyruvate kinase OS=Staphylococcus aureus (strain NCTC 8325) GN=pyk PE=3 SV=1 UPId=UP000008816 PPId=UP000008816
0.0623486	0.258529	1.34756	3	301180000	0.524767	0.556145	Q2FWY9	>sp|Q2FWY9|GATA_STAA8 Glutamyl-tRNA(Gln) amidotransferase subunit A OS=Staphylococcus aureus (strain NCTC 8325) GN=gatA PE=3 SV=1 UPId=UP000008816 PPId=UP000008816
1.03706	-0.0267732	0.658272	7	1058400000	0.665705	0.556184	O52582	>sp|O52582|CDR_STAA8 Coenzyme A disulfide reductase OS=Staphylococcus aureus (strain NCTC 8325) GN=cdr PE=1 SV=3 UPId=UP000008816 PPId=UP000008816
0.514336	0.896693	0.332986	15	996050000	1.1375	0.581338	Q2G2B2	>sp|Q2G2B2|SASG_STAA8 Surface protein G OS=Staphylococcus aureus (strain NCTC 8325) GN=sasG PE=1 SV=1 UPId=UP000008816 PPId=UP000008816;>sp|Q931E9|PLS_STAAM Putative surface protein SAV2496/SAV2497 OS=Staphylococcus aureus (strain Mu50 / ATCC 700699) GN=SA
0.43112	0.353453	0.976325	12	4283700000	1.01896	0.586966	Q2G1J0	>sp|Q2G1J0|ALDA_STAA8 Putative aldehyde dehydrogenase AldA OS=Staphylococcus aureus (strain NCTC 8325) GN=aldA PE=3 SV=1 UPId=UP000008816 PPId=UP000008816
NaN	0.461736	0.729235	3	317290000	0.851848	0.595486	Q2FWX9	>tr|Q2FWX9|Q2FWX9_STAA8 Aldehyde dehydrogenase OS=Staphylococcus aureus (strain NCTC 8325) GN=SAOUHSC_02142 PE=3 SV=1 UPId=UP000008816 PPId=UP000008816
0.816394	0.185629	0.791983	9	2947200000	0.994548	0.598002	Q2FZ54	>tr|Q2FZ54|Q2FZ54_STAA8 Malonyl CoA-acyl carrier protein transacylase OS=Staphylococcus aureus (strain NCTC 8325) GN=SAOUHSC_01198 PE=3 SV=1 UPId=UP000008816 PPId=UP000008816
0.674678	0.484017	0.669197	14	9973800000	1.9825	0.609297	Q2FZ36	>tr|Q2FZ36|Q2FZ36_STAA8 Succinyl-CoA ligase [ADP-forming] subunit alpha OS=Staphylococcus aureus (strain NCTC 8325) GN=SAOUHSC_01218 PE=3 SV=1 UPId=UP000008816 PPId=UP000008816
0.188327	1.36934	0.279923	6	317020000	0.606039	0.612531	Q2FYZ5	>sp|Q2FYZ5|GLPK_STAA8 Glycerol kinase OS=Staphylococcus aureus (strain NCTC 8325) GN=glpK PE=3 SV=1 UPId=UP000008816 PPId=UP000008816;>tr|L7WX73|L7WX73_STAWS Glycerol kinase OS=Staphylococcus warneri (strain SG1) GN=glpK PE=3 SV=1 UPId=UP000011217 PPId=UP0
0.251496	0.714484	0.871819	4	2171600000	1.09011	0.612599	Q2FZZ9	>tr|Q2FZZ9|Q2FZZ9_STAA8 Uncharacterized protein OS=Staphylococcus aureus (strain NCTC 8325) GN=SAOUHSC_00835 PE=3 SV=1 UPId=UP000008816 PPId=UP000008816
0.503737	1.17771	0.162721	7	855630000	0.755965	0.614722	Q2G2G0	>tr|Q2G2G0|Q2G2G0_STAA8 Uncharacterized protein OS=Staphylococcus aureus (strain NCTC 8325) GN=SAOUHSC_00717 PE=4 SV=1 UPId=UP000008816 PPId=UP000008816
0.165539	1.47103	0.208232	6	582380000	0.54135	0.614933	Q2G2D0	>sp|Q2G2D0|IF2_STAA8 Translation initiation factor IF-2 OS=Staphylococcus aureus (strain NCTC 8325) GN=infB PE=3 SV=1 UPId=UP000008816 PPId=UP000008816
0.411511	0.391371	1.05182	6	1735900000	0.982225	0.618234	Q2G2F3	>sp|Q2G2F3|TRAP_STAA8 Signal transduction protein TRAP OS=Staphylococcus aureus (strain NCTC 8325) GN=traP PE=1 SV=1 UPId=UP000008816 PPId=UP000008816
0.348123	0.90144	NaN	5	368190000	0.576132	0.624781	Q2G0L5	>sp|Q2G0L5|SDRC_STAA8 Serine-aspartate repeat-containing protein C OS=Staphylococcus aureus (strain NCTC 8325) GN=sdrC PE=3 SV=1 UPId=UP000008816 PPId=UP000008816;>sp|Q99W48|SDRC_STAAM Serine-aspartate repeat-containing protein C OS=Staphylococcus aureus (
1.34984	0.276796	0.267129	5	750530000	0.655575	0.631254	Q2FXS6	>tr|Q2FXS6|Q2FXS6_STAA8 Cell shape-determining protein MreC OS=Staphylococcus aureus (strain NCTC 8325) GN=SAOUHSC_01759 PE=3 SV=1 UPId=UP000008816 PPId=UP000008816
0.562839	0.405279	0.929949	16	6452900000	1.25659	0.632689	Q2G296	>sp|Q2G296|FTHS_STAA8 Formate--tetrahydrofolate ligase OS=Staphylococcus aureus (strain NCTC 8325) GN=fhs PE=3 SV=1 UPId=UP000008816 PPId=UP000008816
0.896046	0.923023	0.121337	7	1030300000	0.876198	0.646802	Q2FWN9	>sp|Q2FWN9|LUKL2_STAA8 Uncharacterized leukocidin-like protein 2 OS=Staphylococcus aureus (strain NCTC 8325) GN=SAOUHSC_02243 PE=3 SV=1 UPId=UP000008816 PPId=UP000008816
3.12421	-0.431713	-0.563911	5	169390000	0.210119	0.709527	Q2G019	>tr|Q2G019|Q2G019_STAA8 Uncharacterized protein OS=Staphylococcus aureus (strain NCTC 8325) GN=SAOUHSC_00808 PE=1 SV=1 UPId=UP000008816 PPId=UP000008816;>tr|A0A077ULC8|A0A077ULC8_STAAU Putative lipoprotein OS=Staphylococcus aureus GN=ERS140147_02559 PE=4 S
0.56385	0.38763	1.26356	10	1335700000	0.958568	0.738348	Q2FY33	>sp|Q2FY33|GCST_STAA8 Aminomethyltransferase OS=Staphylococcus aureus (strain NCTC 8325) GN=gcvT PE=3 SV=1 UPId=UP000008816 PPId=UP000008816
1.17543	0.915941	0.244637	14	30663000000	0.971065	0.778669	P02976	>sp|P02976|SPA_STAA8 Immunoglobulin G-binding protein A OS=Staphylococcus aureus (strain NCTC 8325) GN=spa PE=1 SV=3 UPId=UP000008816 PPId=UP000008816;>tr|A0A0T7MX33|A0A0T7MX33_STAAU Protein A OS=Staphylococcus aureus GN=spa PE=4 SV=1 UPId=UP000048318 PPId
1.01358	0.952974	0.578572	30	50933000000	1.60627	0.848374	Q2G155	>sp|Q2G155|LIP2_STAA8 Lipase 2 OS=Staphylococcus aureus (strain NCTC 8325) GN=lip2 PE=1 SV=1 UPId=UP000008816 PPId=UP000008816
0.536802	1.65582	0.435287	1	40892000	0.811349	0.875969	Q2G2W5	>tr|Q2G2W5|Q2G2W5_STAA8 Uncharacterized protein OS=Staphylococcus aureus (strain NCTC 8325) GN=SAOUHSC_02630 PE=4 SV=1 UPId=UP000008816 PPId=UP000008816
1.17942	0.66522	NaN	1	76947000	0.761785	0.922321	Q2FZ29	>sp|Q2FZ29|HSLV_STAA8 ATP-dependent protease subunit HslV OS=Staphylococcus aureus (strain NCTC 8325) GN=hslV PE=3 SV=1 UPId=UP000008816 PPId=UP000008816
1.21346	-0.193496	1.87589	6	779400000	0.594408	0.965286	Q2FVK5	>sp|Q2FVK5|SBI_STAA8 Immunoglobulin-binding protein sbi OS=Staphylococcus aureus (strain NCTC 8325) GN=sbi PE=1 SV=1 UPId=UP000008816 PPId=UP000008816
0.34848	0.951511	1.63066	3	336720000	0.925624	0.976883	Q2FZ75	>sp|Q2FZ75|PYRB_STAA8 Aspartate carbamoyltransferase OS=Staphylococcus aureus (strain NCTC 8325) GN=pyrB PE=3 SV=1 UPId=UP000008816 PPId=UP000008816
NaN	0.545181	1.47188	2	94426000	0.561978	1.00853	Q2FZ51	>sp|Q2FZ51|ACP_STAA8 Acyl carrier protein OS=Staphylococcus aureus (strain NCTC 8325) GN=acpP PE=2 SV=1 UPId=UP000008816 PPId=UP000008816
1.31402	0.74429	NaN	4	152960000	0.764702	1.02915	Q2FWW3	>tr|Q2FWW3|Q2FWW3_STAA8 Uncharacterized protein OS=Staphylococcus aureus (strain NCTC 8325) GN=SAOUHSC_02158 PE=4 SV=1 UPId=UP000008816 PPId=UP000008816
0.901275	1.24106	NaN	3	94558000	0.999406	1.07117	Q2G105	>tr|Q2G105|Q2G105_STAA8 Uncharacterized protein OS=Staphylococcus aureus (strain NCTC 8325) GN=SAOUHSC_00356 PE=4 SV=1 UPId=UP000008816 PPId=UP000008816
1.16858	0.903219	1.1988	3	1880600000	2.13452	1.0902	T1YBK1	>tr|T1YBK1|T1YBK1_STAAU Complement inhibitor SCIN OS=Staphylococcus aureus subsp. aureus CN1 GN=SAKOR_01918 PE=4 SV=1 UPId=UP000016220 PPId=UP000008816;>sp|Q2FWV6|SCIN_STAA8 Staphylococcal complement inhibitor OS=Staphylococcus aureus (strain NCTC 8325) GN
0.556769	0.604398	2.1516	4	1014800000	0.77064	1.10426	Q2FVQ2	>sp|Q2FVQ2|Y2650_STAA8 Uncharacterized lipoprotein SAOUHSC_02650 OS=Staphylococcus aureus (strain NCTC 8325) GN=SAOUHSC_02650 PE=3 SV=1 UPId=UP000008816 PPId=UP000008816
1.15282	1.18184	NaN	2	168640000	2.10174	1.16733	Q2G012	>sp|Q2G012|EMP_STAA8 Extracellular matrix protein-binding protein emp OS=Staphylococcus aureus (strain NCTC 8325) GN=emp PE=3 SV=1 UPId=UP000008816 PPId=UP000008816
1.29418	1.12864	1.15706	2	192050000	2.73776	1.1933	Q2FZ94	>tr|Q2FZ94|Q2FZ94_STAA8 Penicillin-binding protein 1 OS=Staphylococcus aureus (strain NCTC 8325) GN=SAOUHSC_01145 PE=4 SV=1 UPId=UP000008816 PPId=UP000008816;>tr|A0A0U0VSY8|A0A0U0VSY8_STAHA Cell division protein FtsI (Peptidoglycan synthetase) OS=Staphyloc
1.55748	0.863292	NaN	2	1465500000	0.750098	1.21038	C5QP22	>tr|C5QP22|C5QP22_9STAP Methyltransferase domain protein OS=Staphylococcus caprae M23864:W1 GN=HMPREF0793_0978 PE=4 SV=1 UPId=UP000003152 PPId=UP000008816
0.876604	1.62223	NaN	4	653470000	0.733755	1.24941	Q2G1N4	>tr|Q2G1N4|Q2G1N4_STAA8 Periplasmic binding protein, putative OS=Staphylococcus aureus (strain NCTC 8325) GN=SAOUHSC_00074 PE=4 SV=1 UPId=UP000008816 PPId=UP000008816
1.74378	NaN	0.759434	2	241040000	0.622485	1.2516	Q2FY29	>tr|Q2FY29|Q2FY29_STAA8 Uncharacterized protein OS=Staphylococcus aureus (strain NCTC 8325) GN=SAOUHSC_01644 PE=4 SV=1 UPId=UP000008816 PPId=UP000008816
0.86886	1.21906	2.08753	6	3370300000	1.21076	1.39182	Q2G260	>sp|Q2G260|Y094_STAA8 Uncharacterized protein SAOUHSC_00094 OS=Staphylococcus aureus (strain NCTC 8325) GN=SAOUHSC_00094 PE=1 SV=1 UPId=UP000008816 PPId=UP000008816
0.686426	2.13698	1.42199	2	348680000	1.1106	1.41513	Q2FZ72	>sp|Q2FZ72|CARB_STAA8 Carbamoyl-phosphate synthase large chain OS=Staphylococcus aureus (strain NCTC 8325) GN=carB PE=3 SV=1 UPId=UP000008816 PPId=UP000008816;>tr|A0A0U0VMJ5|A0A0U0VMJ5_STAHA Carbamoyl-phosphate synthase large chain OS=Staphylococcus haemol
1.10951	1.76048	1.42199	11	2052300000	1.77397	1.43066	Q2G2S6	>sp|Q2G2S6|PRSA_STAA8 Foldase protein PrsA OS=Staphylococcus aureus (strain NCTC 8325) GN=prsA PE=3 SV=1 UPId=UP000008816 PPId=UP000008816
0.258457	3.85217	0.340099	4	497710000	0.472365	1.48357	Q2FZ19	>sp|Q2FZ19|RNJ2_STAA8 Ribonuclease J 2 OS=Staphylococcus aureus (strain NCTC 8325) GN=rnj2 PE=1 SV=2 UPId=UP000008816 PPId=UP000008816
1.05655	1.38527	2.06904	8	1390700000	1.42997	1.50362	Q2FWW1	>tr|Q2FWW1|Q2FWW1_STAA8 MHC class II analog protein OS=Staphylococcus aureus (strain NCTC 8325) GN=SAOUHSC_02161 PE=4 SV=1 UPId=UP000008816 PPId=UP000008816
1.34684	1.38423	1.87422	4	1215600000	1.91976	1.53509	Q2FZ74	>tr|Q2FZ74|Q2FZ74_STAA8 Dihydroorotase OS=Staphylococcus aureus (strain NCTC 8325) GN=pyrC PE=3 SV=1 UPId=UP000008816 PPId=UP000008816
1.44969	1.92415	1.37671	10	2725000000	1.93771	1.58352	Q2FZL3	>sp|Q2FZL3|SSPB_STAA8 Staphopain B OS=Staphylococcus aureus (strain NCTC 8325) GN=sspB PE=1 SV=1 UPId=UP000008816 PPId=UP000008816
1.50359	1.56705	1.76003	15	9819900000	2.64103	1.61022	Q2G222	>sp|Q2G222|Y2979_STAA8 N-acetylmuramoyl-L-alanine amidase domain-containing protein SAOUHSC_02979 OS=Staphylococcus aureus (strain NCTC 8325) GN=SAOUHSC_02979 PE=1 SV=1 UPId=UP000008816 PPId=UP000008816
1.46027	1.9963	NaN	7	241230000	1.00903	1.72829	Q2FUW9	>tr|Q2FUW9|Q2FUW9_STAA8 Uncharacterized protein OS=Staphylococcus aureus (strain NCTC 8325) GN=SAOUHSC_02982 PE=4 SV=1 UPId=UP000008816 PPId=UP000008816
1.61008	1.17385	2.41823	5	3187300000	1.38234	1.73405	Q2FZE9	>sp|Q2FZE9|ISDA_STAA8 Iron-regulated surface determinant protein A OS=Staphylococcus aureus (strain NCTC 8325) GN=isdA PE=1 SV=1 UPId=UP000008816 PPId=UP000008816
0.822679	2.80341	1.98596	3	1618200000	1.08186	1.87068	P0C7Y1	>sp|P0C7Y1|PSMA1_STAA8 Phenol-soluble modulin alpha 1 peptide OS=Staphylococcus aureus (strain NCTC 8325) GN=psmA1 PE=3 SV=1 UPId=UP000008816 PPId=UP000008816;>sp|P0C7Z3|PSMA2_STAA8 Phenol-soluble modulin alpha 2 peptide OS=Staphylococcus aureus (strain NC
1.51921	2.09455	2.06648	6	6038300000	2.01585	1.89341	Q2G0D4	>tr|Q2G0D4|Q2G0D4_STAA8 Secretory antigen SsaA-like protein OS=Staphylococcus aureus (strain NCTC 8325) GN=SAOUHSC_00671 PE=4 SV=1 UPId=UP000008816 PPId=UP000008816
1.98394	2.09671	1.78056	13	7253600000	2.65086	1.95373	Q2FZU3	>tr|Q2FZU3|Q2FZU3_STAA8 Uncharacterized protein OS=Staphylococcus aureus (strain NCTC 8325) GN=SAOUHSC_00897 PE=4 SV=1 UPId=UP000008816 PPId=UP000008816
1.70494	2.7737	1.39858	4	408870000	1.37257	1.95907	Q2FZZ0	>tr|Q2FZZ0|Q2FZZ0_STAA8 Lipoprotein OS=Staphylococcus aureus (strain NCTC 8325) GN=SAOUHSC_00844 PE=3 SV=1 UPId=UP000008816 PPId=UP000008816
2.18973	2.15165	1.59025	2	617980000	2.02365	1.97721	Q2FZJ7	>tr|Q2FZJ7|Q2FZJ7_STAA8 Uncharacterized protein OS=Staphylococcus aureus (strain NCTC 8325) GN=SAOUHSC_01005 PE=4 SV=1 UPId=UP000008816 PPId=UP000008816
1.8841	1.94574	2.10396	24	9025600000	2.96095	1.97793	Q2G0L4	>sp|Q2G0L4|SDRD_STAA8 Serine-aspartate repeat-containing protein D OS=Staphylococcus aureus (strain NCTC 8325) GN=sdrD PE=1 SV=1 UPId=UP000008816 PPId=UP000008816
1.30714	2.68827	NaN	7	703720000	0.67391	1.99771	Q2FUX4	>tr|Q2FUX4|Q2FUX4_STAA8 Aureolysin, putative OS=Staphylococcus aureus (strain NCTC 8325) GN=SAOUHSC_02971 PE=4 SV=1 UPId=UP000008816 PPId=UP000008816
2.18149	2.69507	1.15472	2	165180000	1.32634	2.01042	Q2FW93	>tr|Q2FW93|Q2FW93_STAA8 Uncharacterized protein OS=Staphylococcus aureus (strain NCTC 8325) GN=SAOUHSC_02406 PE=4 SV=1 UPId=UP000008816 PPId=UP000008816
2.27727	1.75647	2.2986	36	14426000000	2.15622	2.11078	Q2FZK7	>sp|Q2FZK7|ATL_STAA8 Bifunctional autolysin OS=Staphylococcus aureus (strain NCTC 8325) GN=atl PE=1 SV=1 UPId=UP000008816 PPId=UP000008816
2.076	2.25711	2.03594	18	7320800000	2.98909	2.12302	Q2G093	>sp|Q2G093|LTAS_STAA8 Lipoteichoic acid synthase OS=Staphylococcus aureus (strain NCTC 8325) GN=ltaS PE=1 SV=1 UPId=UP000008816 PPId=UP000008816
2.18257	2.41804	2.15909	12	13383000000	2.87168	2.25324	Q2G0F2	>tr|Q2G0F2|Q2G0F2_STAA8 Uncharacterized protein OS=Staphylococcus aureus (strain NCTC 8325) GN=SAOUHSC_00617 PE=4 SV=1 UPId=UP000008816 PPId=UP000008816
2.53458	NaN	2.00833	2	337530000	1.13419	2.27146	Q2FUY2	>sp|Q2FUY2|CLFB_STAA8 Clumping factor B OS=Staphylococcus aureus (strain NCTC 8325) GN=clfB PE=1 SV=1 UPId=UP000008816 PPId=UP000008816
2.11069	2.04269	2.69673	4	5253500000	2.088	2.28337	Q2FV52	>sp|Q2FV52|ISAA_STAA8 Probable transglycosylase IsaA OS=Staphylococcus aureus (strain NCTC 8325) GN=isaA PE=1 SV=1 UPId=UP000008816 PPId=UP000008816
2.33623	2.68717	1.90277	4	1753200000	2.02149	2.30873	Q2FW51	>tr|Q2FW51|Q2FW51_STAA8 Truncated MHC class II analog protein OS=Staphylococcus aureus (strain NCTC 8325) GN=SAOUHSC_02466 PE=4 SV=1 UPId=UP000008816 PPId=UP000008816
2.55563	1.8122	2.89933	3	1331700000	1.76721	2.42238	Q2FZB8	>tr|Q2FZB8|Q2FZB8_STAA8 Fibrinogen-binding protein OS=Staphylococcus aureus (strain NCTC 8325) GN=SAOUHSC_01114 PE=4 SV=1 UPId=UP000008816 PPId=UP000008816
2.18561	2.89533	NaN	2	1717700000	1.05378	2.54047	G5JM96	>tr|G5JM96|G5JM96_9STAP Acetyl-CoA carboxylase, biotin carboxylase OS=Staphylococcus simiae CCM 7213 GN=SS7213T_13097 PE=4 SV=1 UPId=UP000005413 PPId=UP000008816
2.31641	2.68588	2.62286	7	11506000000	2.69688	2.54172	Q2FZS2	>tr|Q2FZS2|Q2FZS2_STAA8 Truncated MHC class II analog protein OS=Staphylococcus aureus (strain NCTC 8325) GN=SAOUHSC_00918 PE=4 SV=1 UPId=UP000008816 PPId=UP000008816
2.96292	2.59652	3.58685	3	1310700000	2.052	3.04876	Q2FYF1	>sp|Q2FYF1|EBPS_STAA8 Elastin-binding protein EbpS OS=Staphylococcus aureus (strain NCTC 8325) GN=ebpS PE=1 SV=1 UPId=UP000008816 PPId=UP000008816
3.91688	5.6651	0.497513	5	8999700000	0.8034	3.35983	Q2FWM8	>sp|Q2FWM8|HLD_STAA8 Delta-hemolysin OS=Staphylococcus aureus (strain NCTC 8325) GN=hld PE=3 SV=3 UPId=UP000008816 PPId=UP000008816
2.96134	3.54234	3.67816	6	7326000000	2.37997	3.39395	Q2FUX3	>sp|Q2FUX3|ISAB_STAA8 Immunodominant staphylococcal antigen B OS=Staphylococcus aureus (strain NCTC 8325) GN=isaB PE=2 SV=1 UPId=UP000008816 PPId=UP000008816
#!{Type}E	E	E	N	N	N	N	T	T

## Sheet: 1-E2 vs 1-E1
Ratio H/M normalized 1	Ratio H/M normalized 2	Ratio H/M normalized 3	Unique peptides	Intensity	-Log t-test p-value	t-test Difference	Uniprot ID	Fasta headers
-4.44978	-3.90918	-3.58684	10	3867000000	2.40084	-3.98193	Q2FVK2	>sp|Q2FVK2|HLGC_STAA8 Gamma-hemolysin component C OS=Staphylococcus aureus (strain NCTC 8325) GN=hlgC PE=1 SV=1 UPId=UP000008816 PPId=UP000008816
-3.27563	-3.51389	-2.71353	16	15188000000	2.25466	-3.16769	Q2FVK1	>sp|Q2FVK1|HLGB_STAA8 Gamma-hemolysin component B OS=Staphylococcus aureus (strain NCTC 8325) GN=hlgB PE=1 SV=1 UPId=UP000008816 PPId=UP000008816
-2.21609	-3.46923	-3.30849	7	1030300000	1.77444	-2.99794	Q2FWN9	>sp|Q2FWN9|LUKL2_STAA8 Uncharacterized leukocidin-like protein 2 OS=Staphylococcus aureus (strain NCTC 8325) GN=SAOUHSC_02243 PE=3 SV=1 UPId=UP000008816 PPId=UP000008816
-6.95714	-2.04394	0.4786	4	1169400000	0.490933	-2.84083	Q2G0X2	>tr|Q2G0X2|Q2G0X2_STAA8 Uncharacterized protein OS=Staphylococcus aureus (strain NCTC 8325) GN=SAOUHSC_00401 PE=4 SV=1 UPId=UP000008816 PPId=UP000008816
-3.05293	-2.3135	-2.04123	7	855630000	1.83401	-2.46922	Q2G2G0	>tr|Q2G2G0|Q2G2G0_STAA8 Uncharacterized protein OS=Staphylococcus aureus (strain NCTC 8325) GN=SAOUHSC_00717 PE=4 SV=1 UPId=UP000008816 PPId=UP000008816
-2.21022	-1.40361	-3.10633	6	357590000	1.3471	-2.24005	Q2FWP0	>sp|Q2FWP0|LUKL1_STAA8 Uncharacterized leukocidin-like protein 1 OS=Staphylococcus aureus (strain NCTC 8325) GN=SAOUHSC_02241 PE=1 SV=1 UPId=UP000008816 PPId=UP000008816
-3.60575	-2.61516	-0.471669	3	1331700000	0.862175	-2.23086	Q2FZB8	>tr|Q2FZB8|Q2FZB8_STAA8 Fibrinogen-binding protein OS=Staphylococcus aureus (strain NCTC 8325) GN=SAOUHSC_01114 PE=4 SV=1 UPId=UP000008816 PPId=UP000008816
-2.84647	-2.52152	-0.556878	8	1390700000	0.958845	-1.97496	Q2FWW1	>tr|Q2FWW1|Q2FWW1_STAA8 MHC class II analog protein OS=Staphylococcus aureus (strain NCTC 8325) GN=SAOUHSC_02161 PE=4 SV=1 UPId=UP000008816 PPId=UP000008816
-1.4766	-2.08609	-1.57706	3	1880600000	1.92408	-1.71325	T1YBK1	>tr|T1YBK1|T1YBK1_STAAU Complement inhibitor SCIN OS=Staphylococcus aureus subsp. aureus CN1 GN=SAKOR_01918 PE=4 SV=1 UPId=UP000016220 PPId=UP000008816;>sp|Q2FWV6|SCIN_STAA8 Staphylococcal complement inhibitor OS=Staphylococcus aureus (strain NCTC 8325) GN
2.73121	-0.0439715	-7.2237	5	8999700000	0.179889	-1.51216	Q2FWM8	>sp|Q2FWM8|HLD_STAA8 Delta-hemolysin OS=Staphylococcus aureus (strain NCTC 8325) GN=hld PE=3 SV=3 UPId=UP000008816 PPId=UP000008816
-2.19586	-1.47016	-0.850921	7	11506000000	1.21728	-1.50565	Q2FZS2	>tr|Q2FZS2|Q2FZS2_STAA8 Truncated MHC class II analog protein OS=Staphylococcus aureus (strain NCTC 8325) GN=SAOUHSC_00918 PE=4 SV=1 UPId=UP000008816 PPId=UP000008816
-1.29223	-2.00742	-1.15197	29	18858000000	1.51685	-1.48388	Q2FUU5	>sp|Q2FUU5|LIP1_STAA8 Lipase 1 OS=Staphylococcus aureus (strain NCTC 8325) GN=lipA PE=1 SV=1 UPId=UP000008816 PPId=UP000008816
-2.56418	NaN	-0.331778	3	116860000	0.378737	-1.44798	Q2G1Y6	>tr|Q2G1Y6|Q2G1Y6_STAA8 GTP-binding protein TypA, putative OS=Staphylococcus aureus (strain NCTC 8325) GN=SAOUHSC_01058 PE=4 SV=1 UPId=UP000008816 PPId=UP000008816
-1.87973	-0.965539	NaN	4	535630000	0.703522	-1.42263	Q2FXC3	>sp|Q2FXC3|SPLB_STAA8 Serine protease SplB OS=Staphylococcus aureus (strain NCTC 8325) GN=splB PE=1 SV=1 UPId=UP000008816 PPId=UP000008816
-1.74476	-1.60509	-0.769828	11	6466500000	1.3393	-1.37323	Q2G010	>tr|Q2G010|Q2G010_STAA8 Thermonuclease OS=Staphylococcus aureus (strain NCTC 8325) GN=SAOUHSC_00818 PE=4 SV=1 UPId=UP000008816 PPId=UP000008816
-1.35379	-1.28655	NaN	2	168640000	1.79024	-1.32017	Q2G012	>sp|Q2G012|EMP_STAA8 Extracellular matrix protein-binding protein emp OS=Staphylococcus aureus (strain NCTC 8325) GN=emp PE=3 SV=1 UPId=UP000008816 PPId=UP000008816
-1.83909	-0.660757	NaN	7	703720000	0.552198	-1.24992	Q2FUX4	>tr|Q2FUX4|Q2FUX4_STAA8 Aureolysin, putative OS=Staphylococcus aureus (strain NCTC 8325) GN=SAOUHSC_02971 PE=4 SV=1 UPId=UP000008816 PPId=UP000008816
-2.83129	NaN	0.332755	2	341120000	0.240726	-1.24927	Q2G0Z9	>tr|Q2G0Z9|Q2G0Z9_STAA8 Uncharacterized protein OS=Staphylococcus aureus (strain NCTC 8325) GN=SAOUHSC_00362 PE=4 SV=1 UPId=UP000008816 PPId=UP000008816
-0.709678	-2.28946	-0.714614	2	4342700000	0.845414	-1.23792	Q2G2M0	>tr|Q2G2M0|Q2G2M0_STAA8 Tautomerase OS=Staphylococcus aureus (strain NCTC 8325) GN=SAOUHSC_01362 PE=3 SV=1 UPId=UP000008816 PPId=UP000008816;>tr|A0A0M2NPE7|A0A0M2NPE7_9STAP Tautomerase OS=Staphylococcus pasteuri GN=UF70_0941 PE=3 SV=1 UPId=UP000034266 PPId
-0.765863	-1.68402	-1.22281	30	50933000000	1.35837	-1.22423	Q2G155	>sp|Q2G155|LIP2_STAA8 Lipase 2 OS=Staphylococcus aureus (strain NCTC 8325) GN=lip2 PE=1 SV=1 UPId=UP000008816 PPId=UP000008816
-0.68116	-1.76465	-1.10494	9	1418000000	1.19257	-1.18358	Q2G2R8	>sp|Q2G2R8|SSPP_STAA8 Staphopain A OS=Staphylococcus aureus (strain NCTC 8325) GN=sspP PE=1 SV=1 UPId=UP000008816 PPId=UP000008816
-1.89507	-0.716307	-0.883634	10	2439700000	1.06023	-1.165	Q2FVK3	>tr|Q2FVK3|Q2FVK3_STAA8 Gamma-hemolysin h-gamma-ii subunit, putative OS=Staphylococcus aureus (strain NCTC 8325) GN=SAOUHSC_02708 PE=4 SV=1 UPId=UP000008816 PPId=UP000008816
-0.822844	-1.41434	-1.15216	10	2725000000	1.65405	-1.12978	Q2FZL3	>sp|Q2FZL3|SSPB_STAA8 Staphopain B OS=Staphylococcus aureus (strain NCTC 8325) GN=sspB PE=1 SV=1 UPId=UP000008816 PPId=UP000008816
0.047964	-2.96414	-0.452076	3	110640000	0.45405	-1.12275	Q2G0B1	>sp|Q2G0B1|MGRA_STAA8 HTH-type transcriptional regulator MgrA OS=Staphylococcus aureus (strain NCTC 8325) GN=mgrA PE=1 SV=3 UPId=UP000008816 PPId=UP000008816
-1.0777	NaN	-1.09384	3	244860000	2.32502	-1.08577	Q2FXA4	>tr|Q2FXA4|Q2FXA4_STAA8 Ferrochelatase OS=Staphylococcus aureus (strain NCTC 8325) GN=hemH PE=3 SV=1 UPId=UP000008816 PPId=UP000008816
-0.719068	-0.907518	-1.60306	2	87394000	1.24362	-1.07655	Q2G2U6	>sp|Q2G2U6|WALR_STAA8 Transcriptional regulatory protein WalR OS=Staphylococcus aureus (strain NCTC 8325) GN=walR PE=1 SV=1 UPId=UP000008816 PPId=UP000008816
-0.692399	-0.846489	-1.55546	7	5601300000	1.21875	-1.03145	Q2FWZ8	>sp|Q2FWZ8|FTN_STAA8 Bacterial non-heme ferritin OS=Staphylococcus aureus (strain NCTC 8325) GN=ftnA PE=1 SV=1 UPId=UP000008816 PPId=UP000008816
-1.06491	-1.24496	-0.754383	4	140640000	1.71864	-1.02142	A0A0T7	>tr|A0A0T7M8V7|A0A0T7M8V7_STAAU Smooth muscle caldesmon OS=Staphylococcus aureus GN=ERS093009_02402 PE=4 SV=1 UPId=UP000047221 PPId=UP000008816;>tr|Q2G245|Q2G245_STAA8 Uncharacterized protein OS=Staphylococcus aureus (strain NCTC 8325) GN=SAOUHSC_01854 PE=
-1.43325	-0.971436	-0.56954	4	1753200000	1.2373	-0.991409	Q2FW51	>tr|Q2FW51|Q2FW51_STAA8 Truncated MHC class II analog protein OS=Staphylococcus aureus (strain NCTC 8325) GN=SAOUHSC_02466 PE=4 SV=1 UPId=UP000008816 PPId=UP000008816
-0.381573	-1.59755	NaN	3	200990000	0.455014	-0.989564	Q2FW96	>sp|Q2FW96|MTLD_STAA8 Mannitol-1-phosphate 5-dehydrogenase OS=Staphylococcus aureus (strain NCTC 8325) GN=mtlD PE=3 SV=1 UPId=UP000008816 PPId=UP000008816
-1.01293	-1.27686	-0.537245	8	3807200000	1.31068	-0.942344	Q2FZP9	>sp|Q2FZP9|Y951_STAA8 Putative phosphoesterase SAOUHSC_00951 OS=Staphylococcus aureus (strain NCTC 8325) GN=SAOUHSC_00951 PE=3 SV=1 UPId=UP000008816 PPId=UP000008816
0.0171623	-1.87605	NaN	2	257430000	0.296001	-0.929442	Q2FY61	>tr|Q2FY61|Q2FY61_STAA8 Uncharacterized protein OS=Staphylococcus aureus (strain NCTC 8325) GN=SAOUHSC_01604 PE=4 SV=1 UPId=UP000008816 PPId=UP000008816
-0.462224	-1.0052	-1.26859	10	4194700000	1.21066	-0.912005	Q2G1W2	>sp|Q2G1W2|PCKA_STAA8 Phosphoenolpyruvate carboxykinase [ATP] OS=Staphylococcus aureus (strain NCTC 8325) GN=pckA PE=3 SV=1 UPId=UP000008816 PPId=UP000008816
-1.74974	-0.0398756	NaN	1	829250000	0.313816	-0.894806	Q2G2Q1	>sp|Q2G2Q1|RS15_STAA8 30S ribosomal protein S15 OS=Staphylococcus aureus (strain NCTC 8325) GN=rpsO PE=3 SV=1 UPId=UP000008816 PPId=UP000008816
NaN	-1.46154	-0.311221	3	327250000	0.436006	-0.88638	Q2FYI5	>sp|Q2FYI5|GPSB_STAA8 Cell cycle protein GpsB OS=Staphylococcus aureus (strain NCTC 8325) GN=gpsB PE=3 SV=1 UPId=UP000008816 PPId=UP000008816
0.156084	NaN	-1.84815	4	413220000	0.256774	-0.846033	O34090	>sp|O34090|HEM3_STAA8 Porphobilinogen deaminase OS=Staphylococcus aureus (strain NCTC 8325) GN=hemC PE=3 SV=1 UPId=UP000008816 PPId=UP000008816
NaN	-0.197782	-1.45702	3	317290000	0.382887	-0.8274	Q2FWX9	>tr|Q2FWX9|Q2FWX9_STAA8 Aldehyde dehydrogenase OS=Staphylococcus aureus (strain NCTC 8325) GN=SAOUHSC_02142 PE=3 SV=1 UPId=UP000008816 PPId=UP000008816
-0.150642	-0.89775	-1.36109	12	3543800000	0.822654	-0.803162	Q2G218	>sp|Q2G218|LDH1_STAA8 L-lactate dehydrogenase 1 OS=Staphylococcus aureus (strain NCTC 8325) GN=ldh1 PE=3 SV=2 UPId=UP000008816 PPId=UP000008816
-0.956737	-0.179659	-1.23884	4	575490000	0.887367	-0.791746	Q2G1H0	>tr|Q2G1H0|Q2G1H0_STAA8 Indolepyruvate decarboxylase, putative OS=Staphylococcus aureus (strain NCTC 8325) GN=SAOUHSC_00153 PE=3 SV=1 UPId=UP000008816 PPId=UP000008816
-0.85932	-0.518603	-0.967316	5	1585300000	1.54306	-0.781746	Q2FWV3	>tr|Q2FWV3|Q2FWV3_STAA8 Staphylokinase, putative OS=Staphylococcus aureus (strain NCTC 8325) GN=SAOUHSC_02171 PE=4 SV=1 UPId=UP000008816 PPId=UP000008816
-0.0332658	-0.838667	-1.41721	6	582680000	0.704214	-0.763048	Q2FVY0	>tr|Q2FVY0|Q2FVY0_STAA8 Molybdopterin biosynthesis protein moeA, putative OS=Staphylococcus aureus (strain NCTC 8325) GN=SAOUHSC_02542 PE=4 SV=1 UPId=UP000008816 PPId=UP000008816
-0.549465	-0.739337	-0.974473	2	178780000	1.59287	-0.754425	Q2FXI9	>tr|Q2FXI9|Q2FXI9_STAA8 Uncharacterized protein OS=Staphylococcus aureus (strain NCTC 8325) GN=SAOUHSC_01857 PE=3 SV=1 UPId=UP000008816 PPId=UP000008816;>tr|A0A0U0VIK1|A0A0U0VIK1_STAHA SpoIIIE family cell division protein OS=Staphylococcus haemolyticus GN=
0.120235	-1.61354	NaN	3	94558000	0.261734	-0.746652	Q2G105	>tr|Q2G105|Q2G105_STAA8 Uncharacterized protein OS=Staphylococcus aureus (strain NCTC 8325) GN=SAOUHSC_00356 PE=4 SV=1 UPId=UP000008816 PPId=UP000008816
-1.28163	-0.751342	-0.190231	5	777860000	0.844642	-0.741067	Q2G248	>tr|Q2G248|Q2G248_STAA8 Uncharacterized protein OS=Staphylococcus aureus (strain NCTC 8325) GN=SAOUHSC_01852 PE=4 SV=1 UPId=UP000008816 PPId=UP000008816
-0.719791	-0.902761	-0.560258	10	709210000	1.74481	-0.727603	Q2G0Q3	>sp|Q2G0Q3|SYK_STAA8 Lysine--tRNA ligase OS=Staphylococcus aureus (strain NCTC 8325) GN=lysS PE=3 SV=1 UPId=UP000008816 PPId=UP000008816
-1.16002	-1.39267	0.370322	6	779400000	0.496338	-0.727453	Q2FVK5	>sp|Q2FVK5|SBI_STAA8 Immunoglobulin-binding protein sbi OS=Staphylococcus aureus (strain NCTC 8325) GN=sbi PE=1 SV=1 UPId=UP000008816 PPId=UP000008816
-0.207814	-1.33547	-0.484527	5	1561700000	0.733818	-0.675938	Q2FWB8	>tr|Q2FWB8|Q2FWB8_STAA8 Purine nucleoside phosphorylase DeoD-type OS=Staphylococcus aureus (strain NCTC 8325) GN=deoD PE=3 SV=1 UPId=UP000008816 PPId=UP000008816
-0.666048	-0.370001	-0.971012	2	462280000	1.21359	-0.66902	Q2FWE0	>sp|Q2FWE0|RF1_STAA8 Peptide chain release factor 1 OS=Staphylococcus aureus (strain NCTC 8325) GN=prfA PE=3 SV=1 UPId=UP000008816 PPId=UP000008816;>tr|A0A0U0VSM8|A0A0U0VSM8_STAHA Peptide chain release factor 1 OS=Staphylococcus haemolyticus GN=prfA PE=4 S
-0.713383	-0.343951	-0.948106	16	4228600000	1.20237	-0.66848	Q2G1C9	>tr|Q2G1C9|Q2G1C9_STAA8 Uncharacterized protein OS=Staphylococcus aureus (strain NCTC 8325) GN=SAOUHSC_00196 PE=3 SV=1 UPId=UP000008816 PPId=UP000008816
-0.658015	-0.637936	NaN	2	472750000	2.006	-0.647975	Q2G1B9	>tr|Q2G1B9|Q2G1B9_STAA8 Uncharacterized protein OS=Staphylococcus aureus (strain NCTC 8325) GN=SAOUHSC_00226 PE=4 SV=1 UPId=UP000008816 PPId=UP000008816;>tr|Q2G1C4|Q2G1C4_STAA8 Alcohol dehydrogenase, zinc-containing OS=Staphylococcus aureus (strain NCTC 83
-0.863616	-0.571935	-0.485171	7	745210000	1.5156	-0.64024	Q2G0W9	>sp|Q2G0W9|Y405_STAA8 Uncharacterized lipoprotein SAOUHSC_00405 OS=Staphylococcus aureus (strain NCTC 8325) GN=SAOUHSC_00405 PE=3 SV=2 UPId=UP000008816 PPId=UP000008816
-0.463762	0.0206824	-1.45562	7	710470000	0.548961	-0.632902	Q2FVT5	>tr|Q2FVT5|Q2FVT5_STAA8 Urocanate hydratase OS=Staphylococcus aureus (strain NCTC 8325) GN=hutU PE=3 SV=1 UPId=UP000008816 PPId=UP000008816
-0.788755	-0.572132	-0.524617	26	9004300000	1.78725	-0.628501	Q2G1D8	>sp|Q2G1D8|PFLB_STAA8 Formate acetyltransferase OS=Staphylococcus aureus (strain NCTC 8325) GN=pflB PE=3 SV=1 UPId=UP000008816 PPId=UP000008816
-0.465301	-0.286924	-1.1279	5	650960000	0.873033	-0.62671	Q2FX90	>tr|Q2FX90|Q2FX90_STAA8 Uncharacterized protein OS=Staphylococcus aureus (strain NCTC 8325) GN=SAOUHSC_01987 PE=4 SV=1 UPId=UP000008816 PPId=UP000008816
-0.290352	-0.78111	-0.780173	11	802100000	1.19718	-0.617212	Q2FYZ4	>sp|Q2FYZ4|GLPD_STAA8 Aerobic glycerol-3-phosphate dehydrogenase OS=Staphylococcus aureus (strain NCTC 8325) GN=glpD PE=3 SV=1 UPId=UP000008816 PPId=UP000008816;>sp|Q5HPP0|GLPD_STAEQ Aerobic glycerol-3-phosphate dehydrogenase OS=Staphylococcus epidermidis
-1.99839	0.190466	-0.0119303	3	486560000	0.321836	-0.606619	Q2FY16	>sp|Q2FY16|END4_STAA8 Probable endonuclease 4 OS=Staphylococcus aureus (strain NCTC 8325) GN=nfo PE=3 SV=1 UPId=UP000008816 PPId=UP000008816;>tr|G5JGI5|G5JGI5_9STAP Endonuclease IV (Fragment) OS=Staphylococcus simiae CCM 7213 GN=SS7213T_02768 PE=3 SV=1 UPI
-0.434951	-0.763927	NaN	1	459960000	0.76829	-0.599439	Q5HQM1	>sp|Q5HQM1|Y527_STAEQ NADH dehydrogenase-like protein SERP0527 OS=Staphylococcus epidermidis (strain ATCC 35984 / RP62A) GN=SERP0527 PE=3 SV=1 UPId=UP000000531 PPId=UP000008816
-0.0529124	-0.576753	-1.10071	10	3115800000	0.706017	-0.57679	Q2G241	>sp|Q2G241|SYE_STAA8 Glutamate--tRNA ligase OS=Staphylococcus aureus (strain NCTC 8325) GN=gltX PE=3 SV=1 UPId=UP000008816 PPId=UP000008816
-0.0194242	-0.47637	-1.19661	16	9228900000	0.617211	-0.564136	Q2FV67	>sp|Q2FV67|ROCA_STAA8 1-pyrroline-5-carboxylate dehydrogenase OS=Staphylococcus aureus (strain NCTC 8325) GN=rocA PE=3 SV=1 UPId=UP000008816 PPId=UP000008816
-0.747371	0.000833122	-0.929509	5	681840000	0.724272	-0.558682	Q2G1K9	>tr|Q2G1K9|Q2G1K9_STAA8 Aldehyde-alcohol dehydrogenase OS=Staphylococcus aureus (strain NCTC 8325) GN=SAOUHSC_00113 PE=3 SV=1 UPId=UP000008816 PPId=UP000008816
-0.280871	-0.835355	NaN	1	290370000	0.532379	-0.558113	Q2FWN4	>sp|Q2FWN4|CH60_STAA8 60 kDa chaperonin OS=Staphylococcus aureus (strain NCTC 8325) GN=groL PE=3 SV=1 UPId=UP000008816 PPId=UP000008816
-0.343536	-1.00351	-0.325813	11	1115000000	0.887497	-0.557619	Q2FWA0	>tr|Q2FWA0|Q2FWA0_STAA8 Glutamine--fructose-6-phosphate aminotransferase [isomerizing] OS=Staphylococcus aureus (strain NCTC 8325) GN=glmS PE=3 SV=1 UPId=UP000008816 PPId=UP000008816
-0.39325	-0.253783	-0.949353	5	296120000	0.888652	-0.532129	Q2FY08	>sp|Q2FY08|SYG_STAA8 Glycine--tRNA ligase OS=Staphylococcus aureus (strain NCTC 8325) GN=glyQS PE=3 SV=1 UPId=UP000008816 PPId=UP000008816
-0.276766	-0.623735	-0.689526	13	4800000000	1.27001	-0.530009	Q2FZU6	>tr|Q2FZU6|Q2FZU6_STAA8 Ornithine aminotransferase OS=Staphylococcus aureus (strain NCTC 8325) GN=rocD PE=3 SV=1 UPId=UP000008816 PPId=UP000008816
-0.212955	-0.221011	-1.02579	6	1608800000	0.671874	-0.486586	Q2FXM1	>tr|Q2FXM1|Q2FXM1_STAA8 Uncharacterized protein OS=Staphylococcus aureus (strain NCTC 8325) GN=SAOUHSC_01814 PE=3 SV=1 UPId=UP000008816 PPId=UP000008816
-0.695801	0.194627	-0.895471	6	1095200000	0.524052	-0.465548	Q2G1C0	>sp|Q2G1C0|ISPD_STAA8 2-C-methyl-D-erythritol 4-phosphate cytidylyltransferase OS=Staphylococcus aureus (strain NCTC 8325) GN=ispD PE=3 SV=1 UPId=UP000008816 PPId=UP000008816
-0.247499	-0.671694	NaN	7	241230000	0.560269	-0.459597	Q2FUW9	>tr|Q2FUW9|Q2FUW9_STAA8 Uncharacterized protein OS=Staphylococcus aureus (strain NCTC 8325) GN=SAOUHSC_02982 PE=4 SV=1 UPId=UP000008816 PPId=UP000008816
-0.999308	0.772633	-1.15191	3	114650000	0.27212	-0.459529	Q2G261	>sp|Q2G261|SODM2_STAA8 Superoxide dismutase [Mn/Fe] 2 OS=Staphylococcus aureus (strain NCTC 8325) GN=sodM PE=1 SV=1 UPId=UP000008816 PPId=UP000008816
-1.06113	-0.437548	0.129532	6	671130000	0.500786	-0.456383	Q2G236	>sp|Q2G236|NADE_STAA8 NH(3)-dependent NAD(+) synthetase OS=Staphylococcus aureus (strain NCTC 8325) GN=nadE PE=3 SV=1 UPId=UP000008816 PPId=UP000008816
-0.220019	-0.638981	-0.460661	5	1751300000	1.16477	-0.439887	Q2FWX1	>tr|Q2FWX1|Q2FWX1_STAA8 Uncharacterized protein OS=Staphylococcus aureus (strain NCTC 8325) GN=SAOUHSC_02150 PE=4 SV=1 UPId=UP000008816 PPId=UP000008816
-0.052504	-0.613339	-0.64692	15	5405700000	0.820277	-0.437588	Q2FZU5	>tr|Q2FZU5|Q2FZU5_STAA8 Glutamate dehydrogenase OS=Staphylococcus aureus (strain NCTC 8325) GN=SAOUHSC_00895 PE=3 SV=1 UPId=UP000008816 PPId=UP000008816
-0.255999	-1.15132	0.0991112	6	317020000	0.441454	-0.436069	Q2FYZ5	>sp|Q2FYZ5|GLPK_STAA8 Glycerol kinase OS=Staphylococcus aureus (strain NCTC 8325) GN=glpK PE=3 SV=1 UPId=UP000008816 PPId=UP000008816;>tr|L7WX73|L7WX73_STAWS Glycerol kinase OS=Staphylococcus warneri (strain SG1) GN=glpK PE=3 SV=1 UPId=UP000011217 PPId=UP0
-1.21537	-0.651547	0.567776	4	766160000	0.303602	-0.433047	Q2FYS0	>tr|Q2FYS0|Q2FYS0_STAA8 Uncharacterized protein OS=Staphylococcus aureus (strain NCTC 8325) GN=SAOUHSC_01365 PE=4 SV=1 UPId=UP000008816 PPId=UP000008816
-0.184484	-0.0446547	-1.06599	5	566860000	0.509468	-0.431709	A0A0U0	>tr|A0A0U0VQM4|A0A0U0VQM4_STAHA Tryptophanyl-tRNA synthetase%3B proteobacterial type OS=Staphylococcus haemolyticus GN=trpS PE=3 SV=1 UPId=UP000046272 PPId=UP000008816;>tr|Q2FZQ7|Q2FZQ7_STAA8 Tryptophan--tRNA ligase OS=Staphylococcus aureus (strain NCTC 83
0.533874	-0.893221	-0.907985	9	2380700000	0.327727	-0.422444	Q2FXA0	>sp|Q2FXA0|Y1977_STAA8 UPF0342 protein SAOUHSC_01977 OS=Staphylococcus aureus (strain NCTC 8325) GN=SAOUHSC_01977 PE=3 SV=1 UPId=UP000008816 PPId=UP000008816
-0.212275	NaN	-0.621203	1	42463000	0.537038	-0.416739	G5JMD0	>tr|G5JMD0|G5JMD0_9STAP Uncharacterized protein (Fragment) OS=Staphylococcus simiae CCM 7213 GN=SS7213T_13287 PE=4 SV=1 UPId=UP000005413 PPId=UP000008816;>tr|Q2G2S8|Q2G2S8_STAA8 Uncharacterized protein OS=Staphylococcus aureus (strain NCTC 8325) GN=SAOUHSC
NaN	-0.522963	-0.285822	3	158410000	0.740951	-0.404392	Q2G0J8	>tr|Q2G0J8|Q2G0J8_STAA8 Phosphomethylpyrimidine kinase OS=Staphylococcus aureus (strain NCTC 8325) GN=SAOUHSC_00562 PE=4 SV=1 UPId=UP000008816 PPId=UP000008816
-0.328631	-0.141225	-0.693173	5	1022300000	0.856495	-0.387676	Q2FW66	>sp|Q2FW66|ASP23_STAA8 Alkaline shock protein 23 OS=Staphylococcus aureus (strain NCTC 8325) GN=asp23 PE=3 SV=1 UPId=UP000008816 PPId=UP000008816
0.226077	-1.22635	-0.158538	7	794230000	0.329967	-0.386271	Q2FXU5	>sp|Q2FXU5|SYD_STAA8 Aspartate--tRNA ligase OS=Staphylococcus aureus (strain NCTC 8325) GN=aspS PE=3 SV=1 UPId=UP000008816 PPId=UP000008816
-0.498345	-0.161978	-0.466001	14	18698000000	1.13864	-0.375441	P0A0B7	>sp|P0A0B7|AHPC_STAA8 Alkyl hydroperoxide reductase subunit C OS=Staphylococcus aureus (strain NCTC 8325) GN=ahpC PE=1 SV=1 UPId=UP000008816 PPId=UP000008816
-0.544615	-0.0208219	-0.55301	2	254410000	0.773818	-0.372815	Q2FVT6	>sp|Q2FVT6|HUTI_STAA8 Imidazolonepropionase OS=Staphylococcus aureus (strain NCTC 8325) GN=hutI PE=3 SV=1 UPId=UP000008816 PPId=UP000008816
0.386031	-0.528146	-0.963563	10	2859900000	0.344973	-0.368559	Q2FWY1	>sp|Q2FWY1|PPAC_STAA8 Probable manganese-dependent inorganic pyrophosphatase OS=Staphylococcus aureus (strain NCTC 8325) GN=ppaC PE=3 SV=1 UPId=UP000008816 PPId=UP000008816
0.00151159	-0.900687	-0.158139	7	2996500000	0.478258	-0.352438	Q2G2P2	>tr|Q2G2P2|Q2G2P2_STAA8 Globin domain protein OS=Staphylococcus aureus (strain NCTC 8325) GN=SAOUHSC_00204 PE=3 SV=1 UPId=UP000008816 PPId=UP000008816
-0.029933	-0.196713	-0.829009	2	716470000	0.544989	-0.351885	Q2FW16	>sp|Q2FW16|RL14_STAA8 50S ribosomal protein L14 OS=Staphylococcus aureus (strain NCTC 8325) GN=rplN PE=1 SV=1 UPId=UP000008816 PPId=UP000008816
-0.267661	-0.163036	-0.617391	7	606390000	0.899486	-0.349363	Q2G295	>tr|Q2G295|Q2G295_STAA8 Catabolite control protein A OS=Staphylococcus aureus (strain NCTC 8325) GN=SAOUHSC_01850 PE=4 SV=1 UPId=UP000008816 PPId=UP000008816
0.034792	-0.378788	-0.694072	5	5544100000	0.614812	-0.346023	Q2G036	>sp|Q2G036|CLPP_STAA8 ATP-dependent Clp protease proteolytic subunit OS=Staphylococcus aureus (strain NCTC 8325) GN=clpP PE=1 SV=1 UPId=UP000008816 PPId=UP000008816
0.20237	-0.44711	-0.770742	15	2449200000	0.445684	-0.338494	Q2G0F8	>sp|Q2G0F8|SYR_STAA8 Arginine--tRNA ligase OS=Staphylococcus aureus (strain NCTC 8325) GN=argS PE=3 SV=1 UPId=UP000008816 PPId=UP000008816
-0.809016	0.15442	NaN	2	405800000	0.207559	-0.327298	Q2FXI5	>tr|Q2FXI5|Q2FXI5_STAA8 Uncharacterized protein OS=Staphylococcus aureus (strain NCTC 8325) GN=SAOUHSC_01861 PE=4 SV=1 UPId=UP000008816 PPId=UP000008816
-0.742519	0.115727	NaN	3	40645000	0.222987	-0.313396	Q2FZ92	>sp|Q2FZ92|MURD_STAA8 UDP-N-acetylmuramoylalanine--D-glutamate ligase OS=Staphylococcus aureus (strain NCTC 8325) GN=murD PE=3 SV=1 UPId=UP000008816 PPId=UP000008816
0.694167	-0.256316	-1.36512	6	1024800000	0.183609	-0.309089	Q2FYM1	>sp|Q2FYM1|ODO1_STAA8 2-oxoglutarate dehydrogenase E1 component OS=Staphylococcus aureus (strain NCTC 8325) GN=odhA PE=3 SV=1 UPId=UP000008816 PPId=UP000008816
0.135081	-0.894342	-0.161588	10	2949000000	0.37534	-0.30695	Q2G0M4	>tr|Q2G0M4|Q2G0M4_STAA8 Branched-chain-amino-acid aminotransferase OS=Staphylococcus aureus (strain NCTC 8325) GN=SAOUHSC_00536 PE=3 SV=1 UPId=UP000008816 PPId=UP000008816
0.15065	-0.679248	-0.391375	7	2363700000	0.47543	-0.306658	Q2FW27	>tr|Q2FW27|Q2FW27_STAA8 Adenylate kinase OS=Staphylococcus aureus (strain NCTC 8325) GN=adk PE=3 SV=1 UPId=UP000008816 PPId=UP000008816
-0.0387996	-0.285756	-0.573476	7	1141700000	0.716075	-0.299344	Q2FYJ2	>sp|Q2FYJ2|DHA1_STAA8 Alanine dehydrogenase 1 OS=Staphylococcus aureus (strain NCTC 8325) GN=ald1 PE=3 SV=1 UPId=UP000008816 PPId=UP000008816
0.0235821	-0.247277	-0.658328	10	3017200000	0.558659	-0.294008	P95689	>sp|P95689|SYS_STAA8 Serine--tRNA ligase OS=Staphylococcus aureus (strain NCTC 8325) GN=serS PE=3 SV=1 UPId=UP000008816 PPId=UP000008816
-0.262794	-0.050466	-0.563259	7	767580000	0.724736	-0.292173	Q2FVL2	>tr|Q2FVL2|Q2FVL2_STAA8 Uncharacterized protein OS=Staphylococcus aureus (strain NCTC 8325) GN=SAOUHSC_02699 PE=4 SV=1 UPId=UP000008816 PPId=UP000008816
-0.0626079	-0.377777	-0.432832	12	1756400000	0.894057	-0.291072	Q2FXL7	>sp|Q2FXL7|DHA2_STAA8 Alanine dehydrogenase 2 OS=Staphylococcus aureus (strain NCTC 8325) GN=ald2 PE=3 SV=1 UPId=UP000008816 PPId=UP000008816;>tr|A0A0U0VSF6|A0A0U0VSF6_STAHA Alanine dehydrogenase OS=Staphylococcus haemolyticus GN=ald2 PE=4 SV=1 UPId=UP0000
-0.193656	-0.270824	-0.400374	10	4092600000	1.3863	-0.288285	Q2FYU7	>sp|Q2FYU7|CATA_STAA8 Catalase OS=Staphylococcus aureus (strain NCTC 8325) GN=katA PE=2 SV=2 UPId=UP000008816 PPId=UP000008816
-0.505151	0.0789306	-0.429597	18	10889000000	0.584857	-0.285272	Q2G0N1	>sp|Q2G0N1|EFG_STAA8 Elongation factor G OS=Staphylococcus aureus (strain NCTC 8325) GN=fusA PE=1 SV=3 UPId=UP000008816 PPId=UP000008816
0.0860384	-0.220294	-0.709372	12	5797800000	0.457639	-0.281209	Q2G0J0	>tr|Q2G0J0|Q2G0J0_STAA8 Phosphate acetyltransferase OS=Staphylococcus aureus (strain NCTC 8325) GN=SAOUHSC_00574 PE=4 SV=1 UPId=UP000008816 PPId=UP000008816
-0.191964	-0.38051	-0.269307	6	1732200000	1.44381	-0.280594	Q2FZ55	>sp|Q2FZ55|PLSX_STAA8 Phosphate acyltransferase OS=Staphylococcus aureus (strain NCTC 8325) GN=plsX PE=3 SV=1 UPId=UP000008816 PPId=UP000008816
0.260243	-0.269008	-0.821209	16	8181900000	0.328793	-0.276658	Q2FYT8	>tr|Q2FYT8|Q2FYT8_STAA8 Transketolase OS=Staphylococcus aureus (strain NCTC 8325) GN=SAOUHSC_01337 PE=3 SV=1 UPId=UP000008816 PPId=UP000008816
0.243576	-0.351004	-0.719524	13	8248500000	0.367087	-0.275651	Q2FXL5	>sp|Q2FXL5|ACKA_STAA8 Acetate kinase OS=Staphylococcus aureus (strain NCTC 8325) GN=ackA PE=3 SV=1 UPId=UP000008816 PPId=UP000008816
-2.05443	1.8903	-0.660837	6	7326000000	0.0788436	-0.274987	Q2FUX3	>sp|Q2FUX3|ISAB_STAA8 Immunodominant staphylococcal antigen B OS=Staphylococcus aureus (strain NCTC 8325) GN=isaB PE=2 SV=1 UPId=UP000008816 PPId=UP000008816
-0.891749	-0.746991	0.821731	7	2470300000	0.174701	-0.272336	Q2FWE6	>sp|Q2FWE6|UPP_STAA8 Uracil phosphoribosyltransferase OS=Staphylococcus aureus (strain NCTC 8325) GN=upp PE=3 SV=1 UPId=UP000008816 PPId=UP000008816
-0.361186	-0.188887	-0.246837	7	1548400000	1.46285	-0.265637	Q2G2A4	>tr|Q2G2A4|Q2G2A4_STAA8 Dihydrolipoamide S-acetyltransferase component of pyruvate dehydrogenase complex E2, putative OS=Staphylococcus aureus (strain NCTC 8325) GN=SAOUHSC_01042 PE=3 SV=1 UPId=UP000008816 PPId=UP000008816
0.0159577	-0.142628	-0.667531	6	475140000	0.483546	-0.264734	Q2FXV9	>sp|Q2FXV9|SYA_STAA8 Alanine--tRNA ligase OS=Staphylococcus aureus (strain NCTC 8325) GN=alaS PE=3 SV=1 UPId=UP000008816 PPId=UP000008816
-0.377585	-0.148949	NaN	4	483060000	0.583696	-0.263267	Q2FWB5	>tr|Q2FWB5|Q2FWB5_STAA8 Uncharacterized protein OS=Staphylococcus aureus (strain NCTC 8325) GN=SAOUHSC_02383 PE=4 SV=1 UPId=UP000008816 PPId=UP000008816
0.0895897	-0.572487	-0.300746	9	4194300000	0.512884	-0.261214	Q2FZ25	>sp|Q2FZ25|RS2_STAA8 30S ribosomal protein S2 OS=Staphylococcus aureus (strain NCTC 8325) GN=rpsB PE=3 SV=2 UPId=UP000008816 PPId=UP000008816
0.0343921	-0.914796	0.0971738	9	3365100000	0.293459	-0.261077	Q2FW38	>sp|Q2FW38|RL13_STAA8 50S ribosomal protein L13 OS=Staphylococcus aureus (strain NCTC 8325) GN=rplM PE=1 SV=1 UPId=UP000008816 PPId=UP000008816
-0.372008	-0.482989	0.0752838	15	18306000000	0.573231	-0.259905	Q2G0G1	>sp|Q2G0G1|ADH_STAA8 Alcohol dehydrogenase OS=Staphylococcus aureus (strain NCTC 8325) GN=adh PE=3 SV=1 UPId=UP000008816 PPId=UP000008816
1.76542	NaN	-2.285	2	379410000	0.0367886	-0.259788	P0C818	>sp|P0C818|PSMA4_STAA8 Phenol-soluble modulin alpha 4 peptide OS=Staphylococcus aureus (strain NCTC 8325) GN=psmA4 PE=3 SV=1 UPId=UP000008816 PPId=UP000008816
-0.131513	-0.526197	-0.118336	9	9080700000	0.71465	-0.258682	Q2FXL6	>sp|Q2FXL6|Y1819_STAA8 Putative universal stress protein SAOUHSC_01819 OS=Staphylococcus aureus (strain NCTC 8325) GN=SAOUHSC_01819 PE=3 SV=1 UPId=UP000008816 PPId=UP000008816
0.114752	-0.180368	-0.693735	5	758460000	0.402232	-0.253117	Q2G1Z0	>tr|Q2G1Z0|Q2G1Z0_STAA8 Uncharacterized protein OS=Staphylococcus aureus (strain NCTC 8325) GN=SAOUHSC_00655 PE=4 SV=1 UPId=UP000008816 PPId=UP000008816
-0.160702	-0.127571	-0.455327	17	2937100000	0.852722	-0.247866	Q2FYS9	>tr|Q2FYS9|Q2FYS9_STAA8 Aconitate hydratase OS=Staphylococcus aureus (strain NCTC 8325) GN=SAOUHSC_01347 PE=3 SV=1 UPId=UP000008816 PPId=UP000008816
-0.00595302	-0.166214	-0.56004	5	1714800000	0.558466	-0.244069	P0C0V7	>sp|P0C0V7|GLMM_STAA8 Phosphoglucosamine mutase OS=Staphylococcus aureus (strain NCTC 8325) GN=glmM PE=1 SV=1 UPId=UP000008816 PPId=UP000008816
-0.187778	-0.522378	-0.00694729	3	491520000	0.594799	-0.239035	Q2G0D0	>sp|Q2G0D0|Y675_STAA8 Probable transcriptional regulatory protein SAOUHSC_00675 OS=Staphylococcus aureus (strain NCTC 8325) GN=SAOUHSC_00675 PE=3 SV=1 UPId=UP000008816 PPId=UP000008816
0.535992	0.0119486	-1.20608	20	7374300000	0.147453	-0.219381	P47768	>sp|P47768|RPOB_STAA8 DNA-directed RNA polymerase subunit beta OS=Staphylococcus aureus (strain NCTC 8325) GN=rpoB PE=3 SV=2 UPId=UP000008816 PPId=UP000008816
-0.0751199	-0.226393	-0.347321	9	2666900000	0.954973	-0.216278	Q2FXP7	>sp|Q2FXP7|SYT_STAA8 Threonine--tRNA ligase OS=Staphylococcus aureus (strain NCTC 8325) GN=thrS PE=3 SV=1 UPId=UP000008816 PPId=UP000008816
0.292998	-0.477293	-0.461141	16	5698100000	0.313057	-0.215145	Q2G1U3	>tr|Q2G1U3|Q2G1U3_STAA8 Oligoendopeptidase F OS=Staphylococcus aureus (strain NCTC 8325) GN=SAOUHSC_00937 PE=4 SV=1 UPId=UP000008816 PPId=UP000008816
-0.14115	-0.365149	-0.1289	12	5710700000	0.957781	-0.211733	Q2G0M8	>tr|Q2G0M8|Q2G0M8_STAA8 Uncharacterized protein OS=Staphylococcus aureus (strain NCTC 8325) GN=SAOUHSC_00532 PE=3 SV=1 UPId=UP000008816 PPId=UP000008816
-0.344722	-0.383545	0.0963702	19	8247100000	0.516282	-0.210632	Q2G0Y7	>sp|Q2G0Y7|IMDH_STAA8 Inosine-5-monophosphate dehydrogenase OS=Staphylococcus aureus (strain NCTC 8325) GN=guaB PE=3 SV=1 UPId=UP000008816 PPId=UP000008816
0.801669	-0.0170906	-1.39937	4	933640000	0.10795	-0.20493	Q2FWB7	>tr|Q2FWB7|Q2FWB7_STAA8 Uncharacterized protein OS=Staphylococcus aureus (strain NCTC 8325) GN=SAOUHSC_02381 PE=3 SV=1 UPId=UP000008816 PPId=UP000008816
-0.154705	-0.652879	0.203099	10	1755400000	0.29916	-0.201495	Q2FZG6	>tr|Q2FZG6|Q2FZG6_STAA8 Peptide deformylase OS=Staphylococcus aureus (strain NCTC 8325) GN=def PE=3 SV=1 UPId=UP000008816 PPId=UP000008816
-0.266627	-0.382196	0.0579635	5	965010000	0.562938	-0.196953	Q2FWZ0	>sp|Q2FWZ0|GATB_STAA8 Aspartyl/glutamyl-tRNA(Asn/Gln) amidotransferase subunit B OS=Staphylococcus aureus (strain NCTC 8325) GN=gatB PE=3 SV=1 UPId=UP000008816 PPId=UP000008816
-0.322991	-0.141225	-0.122251	5	273870000	1.03382	-0.195489	Q2G071	>tr|Q2G071|Q2G071_STAA8 Uncharacterized protein OS=Staphylococcus aureus (strain NCTC 8325) GN=SAOUHSC_00749 PE=4 SV=1 UPId=UP000008816 PPId=UP000008816
-0.475907	-0.33362	0.225217	15	9819900000	0.338403	-0.19477	Q2G222	>sp|Q2G222|Y2979_STAA8 N-acetylmuramoyl-L-alanine amidase domain-containing protein SAOUHSC_02979 OS=Staphylococcus aureus (strain NCTC 8325) GN=SAOUHSC_02979 PE=1 SV=1 UPId=UP000008816 PPId=UP000008816
0.158411	0.0430932	-0.785039	11	2070900000	0.236623	-0.194511	Q2FVW9	>tr|Q2FVW9|Q2FVW9_STAA8 Uncharacterized protein OS=Staphylococcus aureus (strain NCTC 8325) GN=SAOUHSC_02554 PE=1 SV=1 UPId=UP000008816 PPId=UP000008816
-0.849647	0.0327411	0.238391	5	778150000	0.206374	-0.192838	Q2FZD8	>tr|Q2FZD8|Q2FZD8_STAA8 Phenylalanine--tRNA ligase beta subunit OS=Staphylococcus aureus (strain NCTC 8325) GN=pheT PE=3 SV=1 UPId=UP000008816 PPId=UP000008816
-0.0494816	-0.704744	0.18106	6	906300000	0.2626	-0.191055	Q2FW22	>sp|Q2FW22|RL18_STAA8 50S ribosomal protein L18 OS=Staphylococcus aureus (strain NCTC 8325) GN=rplR PE=1 SV=1 UPId=UP000008816 PPId=UP000008816
-0.600682	0.104924	-0.0721019	14	5963200000	0.331561	-0.189287	Q2FYY6	>tr|Q2FYY6|Q2FYY6_STAA8 Glutamine synthetase OS=Staphylococcus aureus (strain NCTC 8325) GN=SAOUHSC_01287 PE=3 SV=1 UPId=UP000008816 PPId=UP000008816;>sp|Q5HPN2|GLNA_STAEQ Glutamine synthetase OS=Staphylococcus epidermidis (strain ATCC 35984 / RP62A) GN=gl
-0.364363	-0.388797	0.197738	7	1067800000	0.360728	-0.185141	Q2FW91	>tr|Q2FW91|Q2FW91_STAA8 Arginase OS=Staphylococcus aureus (strain NCTC 8325) GN=SAOUHSC_02409 PE=3 SV=1 UPId=UP000008816 PPId=UP000008816
-0.570273	0.265901	-0.229295	7	1117700000	0.26767	-0.177889	Q2G235	>tr|Q2G235|Q2G235_STAA8 Nicotinate phosphoribosyltransferase OS=Staphylococcus aureus (strain NCTC 8325) GN=SAOUHSC_02133 PE=3 SV=1 UPId=UP000008816 PPId=UP000008816
-0.0171557	-0.894687	0.380998	9	4622000000	0.164387	-0.176948	Q2FZJ6	>sp|Q2FZJ6|FOLD_STAA8 Bifunctional protein FolD OS=Staphylococcus aureus (strain NCTC 8325) GN=folD PE=3 SV=1 UPId=UP000008816 PPId=UP000008816
-0.479085	-0.599592	0.55025	5	1003200000	0.169452	-0.176142	Q2FV21	>sp|Q2FV21|PANB_STAA8 3-methyl-2-oxobutanoate hydroxymethyltransferase OS=Staphylococcus aureus (strain NCTC 8325) GN=panB PE=3 SV=2 UPId=UP000008816 PPId=UP000008816
-0.0745447	-0.253783	NaN	2	1717700000	0.497411	-0.164164	G5JM96	>tr|G5JM96|G5JM96_9STAP Acetyl-CoA carboxylase, biotin carboxylase OS=Staphylococcus simiae CCM 7213 GN=SS7213T_13097 PE=4 SV=1 UPId=UP000005413 PPId=UP000008816
-0.978789	-0.212417	0.712246	7	324980000	0.110699	-0.159653	Q2G2M6	>sp|Q2G2M6|SYC_STAA8 Cysteine--tRNA ligase OS=Staphylococcus aureus (strain NCTC 8325) GN=cysS PE=3 SV=1 UPId=UP000008816 PPId=UP000008816
0.136641	-0.693341	0.0777528	4	1498000000	0.213923	-0.159649	Q2FZL5	>tr|Q2FZL5|Q2FZL5_STAA8 1,4-dihydroxy-2-naphthoyl-CoA synthase OS=Staphylococcus aureus (strain NCTC 8325) GN=menB PE=3 SV=1 UPId=UP000008816 PPId=UP000008816
-0.255483	-0.0597156	NaN	2	308700000	0.451213	-0.157599	Q2G0J1	>sp|Q2G0J1|Y573_STAA8 Putative heme-dependent peroxidase SAOUHSC_00573 OS=Staphylococcus aureus (strain NCTC 8325) GN=SAOUHSC_00573 PE=3 SV=1 UPId=UP000008816 PPId=UP000008816
0.248887	-0.518992	-0.201517	2	995270000	0.256878	-0.157207	Q2FWN3	>sp|Q2FWN3|CH10_STAA8 10 kDa chaperonin OS=Staphylococcus aureus (strain NCTC 8325) GN=groS PE=3 SV=1 UPId=UP000008816 PPId=UP000008816;>tr|A0A0Q0WLU0|A0A0Q0WLU0_STAHA 10 kDa chaperonin OS=Staphylococcus haemolyticus GN=groS PE=3 SV=1 UPId=UP000053523 PPId
-0.461636	0.547134	-0.551649	5	485020000	0.153534	-0.155383	Q2G193	>tr|Q2G193|Q2G193_STAA8 Uncharacterized protein OS=Staphylococcus aureus (strain NCTC 8325) GN=SAOUHSC_00253 PE=4 SV=1 UPId=UP000008816 PPId=UP000008816;>tr|A0A0H3K6K1|A0A0H3K6K1_STAAE Uncharacterized protein OS=Staphylococcus aureus (strain Newman) GN=NWM
-0.396097	0.315131	-0.384599	8	2135700000	0.238697	-0.155188	Q2G041	>tr|Q2G041|Q2G041_STAA8 Thioredoxin reductase OS=Staphylococcus aureus (strain NCTC 8325) GN=SAOUHSC_00785 PE=3 SV=1 UPId=UP000008816 PPId=UP000008816
-0.120487	-0.286523	-0.057217	5	2269400000	0.818274	-0.154742	Q5HLZ8	>sp|Q5HLZ8|RS10_STAEQ 30S ribosomal protein S10 OS=Staphylococcus epidermidis (strain ATCC 35984 / RP62A) GN=rpsJ PE=3 SV=1 UPId=UP000000531 PPId=UP000008816
-0.240729	-0.0672694	NaN	3	495150000	0.48608	-0.153999	Q2FY27	>tr|Q2FY27|Q2FY27_STAA8 Glucokinase, putative OS=Staphylococcus aureus (strain NCTC 8325) GN=SAOUHSC_01646 PE=4 SV=1 UPId=UP000008816 PPId=UP000008816
0.424321	-0.255592	-0.614409	10	5312700000	0.171362	-0.14856	Q2FV76	>tr|Q2FV76|Q2FV76_STAA8 HMG-CoA synthase, putative OS=Staphylococcus aureus (strain NCTC 8325) GN=SAOUHSC_02860 PE=4 SV=1 UPId=UP000008816 PPId=UP000008816
0.339228	0.948758	-1.72984	11	3352000000	0.0592009	-0.147285	Q2FZ82	>sp|Q2FZ82|SYI_STAA8 Isoleucine--tRNA ligase OS=Staphylococcus aureus (strain NCTC 8325) GN=ileS PE=3 SV=1 UPId=UP000008816 PPId=UP000008816
-0.140649	0.636351	-0.925255	11	1503100000	0.107424	-0.143184	Q2FVW4	>sp|Q2FVW4|Y2577_STAA8 Putative 2-hydroxyacid dehydrogenase SAOUHSC_02577 OS=Staphylococcus aureus (strain NCTC 8325) GN=SAOUHSC_02577 PE=3 SV=1 UPId=UP000008816 PPId=UP000008816
-0.352373	0.167979	-0.228534	9	2570800000	0.325181	-0.137643	Q2G029	>tr|Q2G029|Q2G029_STAA8 2,3-bisphosphoglycerate-independent phosphoglycerate mutase OS=Staphylococcus aureus (strain NCTC 8325) GN=gpmI PE=1 SV=1 UPId=UP000008816 PPId=UP000008816
0.605288	-0.7388	-0.276378	10	2459900000	0.118052	-0.13663	Q2FZ53	>tr|Q2FZ53|Q2FZ53_STAA8 3-oxoacyl-(Acyl-carrier-protein) reductase, putative OS=Staphylococcus aureus (strain NCTC 8325) GN=SAOUHSC_01199 PE=1 SV=1 UPId=UP000008816 PPId=UP000008816
-0.996466	0.728138	NaN	6	301690000	0.04492	-0.134164	Q2G077	>tr|Q2G077|Q2G077_STAA8 Ribonucleotide-disphosphate reductase beta chain, putative OS=Staphylococcus aureus (strain NCTC 8325) GN=SAOUHSC_00743 PE=4 SV=1 UPId=UP000008816 PPId=UP000008816
0.030392	-0.267192	-0.164489	4	5642900000	0.576692	-0.133763	Q2FW11	>sp|Q2FW11|RL22_STAA8 50S ribosomal protein L22 OS=Staphylococcus aureus (strain NCTC 8325) GN=rplV PE=1 SV=1 UPId=UP000008816 PPId=UP000008816;>sp|Q5HM04|RL22_STAEQ 50S ribosomal protein L22 OS=Staphylococcus epidermidis (strain ATCC 35984 / RP62A) GN=rpl
0.358457	-0.386921	-0.338217	6	538360000	0.179061	-0.122227	Q2FZV7	>sp|Q2FZV7|Y878_STAA8 NADH dehydrogenase-like protein SAOUHSC_00878 OS=Staphylococcus aureus (strain NCTC 8325) GN=SAOUHSC_00878 PE=1 SV=1 UPId=UP000008816 PPId=UP000008816
-0.560992	NaN	0.317913	4	972620000	0.0818522	-0.121539	Q2G2F0	>tr|Q2G2F0|Q2G2F0_STAA8 Uncharacterized protein OS=Staphylococcus aureus (strain NCTC 8325) GN=SAOUHSC_01968 PE=4 SV=1 UPId=UP000008816 PPId=UP000008816
-0.282385	-0.462859	0.384552	8	4549000000	0.163221	-0.120231	Q2FYJ3	>sp|Q2FYJ3|TDCB_STAA8 L-threonine dehydratase catabolic TdcB OS=Staphylococcus aureus (strain NCTC 8325) GN=tdcB PE=3 SV=1 UPId=UP000008816 PPId=UP000008816
0.128837	-0.914796	0.437526	2	948380000	0.0951765	-0.116144	Q2FXM0	>sp|Q2FXM0|Y1815_STAA8 UPF0173 metal-dependent hydrolase SAOUHSC_01815 OS=Staphylococcus aureus (strain NCTC 8325) GN=SAOUHSC_01815 PE=3 SV=1 UPId=UP000008816 PPId=UP000008816
-0.352902	-0.548484	0.565642	20	23585000000	0.110435	-0.111914	Q2G0N0	>sp|Q2G0N0|EFTU_STAA8 Elongation factor Tu OS=Staphylococcus aureus (strain NCTC 8325) GN=tuf PE=3 SV=1 UPId=UP000008816 PPId=UP000008816
-0.262536	-0.204199	0.142937	3	7524100000	0.315518	-0.107933	Q2FZZ8	>sp|Q2FZZ8|GCSH_STAA8 Glycine cleavage system H protein OS=Staphylococcus aureus (strain NCTC 8325) GN=gcvH PE=3 SV=1 UPId=UP000008816 PPId=UP000008816
0.15298	-0.672019	0.19783	12	4283700000	0.129966	-0.10707	Q2G1J0	>sp|Q2G1J0|ALDA_STAA8 Putative aldehyde dehydrogenase AldA OS=Staphylococcus aureus (strain NCTC 8325) GN=aldA PE=3 SV=1 UPId=UP000008816 PPId=UP000008816
-0.0244115	0.195587	-0.484312	6	1560400000	0.184259	-0.104379	Q2FZT4	>sp|Q2FZT4|Y906_STAA8 Uncharacterized protein SAOUHSC_00906 OS=Staphylococcus aureus (strain NCTC 8325) GN=SAOUHSC_00906 PE=3 SV=1 UPId=UP000008816 PPId=UP000008816
0.440981	0.624145	-1.3711	7	1058400000	0.0518519	-0.101992	O52582	>sp|O52582|CDR_STAA8 Coenzyme A disulfide reductase OS=Staphylococcus aureus (strain NCTC 8325) GN=cdr PE=1 SV=3 UPId=UP000008816 PPId=UP000008816
0.151427	-0.483066	0.0328187	16	10992000000	0.180508	-0.099607	Q2G2A3	>tr|Q2G2A3|Q2G2A3_STAA8 Dihydrolipoyl dehydrogenase OS=Staphylococcus aureus (strain NCTC 8325) GN=SAOUHSC_01043 PE=4 SV=1 UPId=UP000008816 PPId=UP000008816
0.281358	-0.614857	0.0512844	18	7320800000	0.119346	-0.0940716	Q2G093	>sp|Q2G093|LTAS_STAA8 Lipoteichoic acid synthase OS=Staphylococcus aureus (strain NCTC 8325) GN=ltaS PE=1 SV=1 UPId=UP000008816 PPId=UP000008816
0.241677	-0.196713	-0.315408	18	12146000000	0.188532	-0.0901479	Q2FXQ6	>sp|Q2FXQ6|TIG_STAA8 Trigger factor OS=Staphylococcus aureus (strain NCTC 8325) GN=tig PE=3 SV=1 UPId=UP000008816 PPId=UP000008816
0.0231811	-0.306397	0.0331541	12	3727000000	0.273389	-0.0833539	Q2FXH9	>sp|Q2FXH9|PEPVL_STAA8 Putative dipeptidase SAOUHSC_01868 OS=Staphylococcus aureus (strain NCTC 8325) GN=SAOUHSC_01868 PE=3 SV=1 UPId=UP000008816 PPId=UP000008816
-0.0191001	-0.201346	-0.0097526	5	429280000	0.463911	-0.0767328	Q2FZ58	>sp|Q2FZ58|Y1193_STAA8 Uncharacterized protein SAOUHSC_01193 OS=Staphylococcus aureus (strain NCTC 8325) GN=SAOUHSC_01193 PE=3 SV=1 UPId=UP000008816 PPId=UP000008816
-0.122981	-0.286377	0.207439	11	2052300000	0.162021	-0.0673062	Q2G2S6	>sp|Q2G2S6|PRSA_STAA8 Foldase protein PrsA OS=Staphylococcus aureus (strain NCTC 8325) GN=prsA PE=3 SV=1 UPId=UP000008816 PPId=UP000008816
-0.0393697	0.167979	-0.286952	15	3861300000	0.138486	-0.0527808	Q2G2D8	>tr|Q2G2D8|Q2G2D8_STAA8 ABC transporter, substrate-binding protein, putative OS=Staphylococcus aureus (strain NCTC 8325) GN=SAOUHSC_00634 PE=3 SV=1 UPId=UP000008816 PPId=UP000008816;>tr|A0A0U0VP99|A0A0U0VP99_STAHA ABC transporter substrate-binding protein
-0.865315	0.766349	NaN	2	1465500000	0.0170806	-0.0494834	C5QP22	>tr|C5QP22|C5QP22_9STAP Methyltransferase domain protein OS=Staphylococcus caprae M23864:W1 GN=HMPREF0793_0978 PE=4 SV=1 UPId=UP000003152 PPId=UP000008816
-0.0871761	-0.280286	0.226964	8	2497700000	0.107137	-0.046833	Q2FXL3	>tr|Q2FXL3|Q2FXL3_STAA8 Probable thiol peroxidase OS=Staphylococcus aureus (strain NCTC 8325) GN=tpx PE=1 SV=1 UPId=UP000008816 PPId=UP000008816
0.320278	-0.338505	-0.116602	7	6279900000	0.0767805	-0.0449429	P48860	>sp|P48860|RL7_STAA8 50S ribosomal protein L7/L12 OS=Staphylococcus aureus (strain NCTC 8325) GN=rplL PE=3 SV=2 UPId=UP000008816 PPId=UP000008816
-0.224408	-0.195289	0.286723	10	2880200000	0.0892772	-0.0443248	Q2FZW6	>sp|Q2FZW6|DLTA_STAA8 D-alanine--poly(phosphoribitol) ligase subunit 1 OS=Staphylococcus aureus (strain NCTC 8325) GN=dltA PE=3 SV=1 UPId=UP000008816 PPId=UP000008816
-0.540462	NaN	0.457235	3	143950000	0.0236425	-0.0416135	Q2G0Q9	>sp|Q2G0Q9|HSLO_STAA8 33 kDa chaperonin OS=Staphylococcus aureus (strain NCTC 8325) GN=hslO PE=3 SV=1 UPId=UP000008816 PPId=UP000008816
-0.887122	-0.487924	1.27278	6	991090000	0.0160603	-0.0340893	Q2FW20	>sp|Q2FW20|RS8_STAA8 30S ribosomal protein S8 OS=Staphylococcus aureus (strain NCTC 8325) GN=rpsH PE=3 SV=1 UPId=UP000008816 PPId=UP000008816
-0.243213	-0.0738056	0.216843	2	325310000	0.0825533	-0.0333917	Q2FZA1	>tr|Q2FZA1|Q2FZA1_STAA8 Uncharacterized N-acetyltransferase SAOUHSC_01138 OS=Staphylococcus aureus (strain NCTC 8325) GN=SAOUHSC_01138 PE=3 SV=1 UPId=UP000008816 PPId=UP000008816
-0.00619519	-0.170454	0.0921606	15	4802700000	0.12587	-0.0281628	Q2G2A5	>tr|Q2G2A5|Q2G2A5_STAA8 Pyruvate dehydrogenase complex, E1 component, pyruvate dehydrogenase beta subunit, putative OS=Staphylococcus aureus (strain NCTC 8325) GN=SAOUHSC_01041 PE=4 SV=1 UPId=UP000008816 PPId=UP000008816
0.346264	-0.31956	-0.105029	5	3540600000	0.0427151	-0.0261082	Q2FY41	>sp|Q2FY41|EFP_STAA8 Elongation factor P OS=Staphylococcus aureus (strain NCTC 8325) GN=efp PE=3 SV=1 UPId=UP000008816 PPId=UP000008816
0.257596	-0.320997	0.00165114	7	4643900000	0.0393484	-0.020583	Q2FW32	>sp|Q2FW32|RPOA_STAA8 DNA-directed RNA polymerase subunit alpha OS=Staphylococcus aureus (strain NCTC 8325) GN=rpoA PE=3 SV=1 UPId=UP000008816 PPId=UP000008816
0.324745	-0.59816	0.227239	27	67802000000	0.0164428	-0.015392	Q2G1X0	>sp|Q2G1X0|HLA_STAA8 Alpha-hemolysin OS=Staphylococcus aureus (strain NCTC 8325) GN=hly PE=1 SV=1 UPId=UP000008816 PPId=UP000008816
-0.412013	-0.0303363	0.428299	2	542660000	0.00596091	-0.00468342	Q2FWF5	>sp|Q2FWF5|FABZ_STAA8 3-hydroxyacyl-[acyl-carrier-protein] dehydratase FabZ OS=Staphylococcus aureus (strain NCTC 8325) GN=fabZ PE=3 SV=1 UPId=UP000008816 PPId=UP000008816
0.108869	-0.436216	0.31566	12	12853000000	0.00536765	-0.00389585	Q2G031	>sp|Q2G031|PGK_STAA8 Phosphoglycerate kinase OS=Staphylococcus aureus (strain NCTC 8325) GN=pgk PE=3 SV=1 UPId=UP000008816 PPId=UP000008816
-0.115006	-0.296282	0.403604	6	2551500000	0.00376645	-0.00256112	Q2G0Z0	>tr|Q2G0Z0|Q2G0Z0_STAA8 Uncharacterized protein OS=Staphylococcus aureus (strain NCTC 8325) GN=SAOUHSC_00371 PE=4 SV=1 UPId=UP000008816 PPId=UP000008816
0.351441	0.417062	-0.772284	12	8872200000	0.00100374	-0.00126012	Q2G1Y5	>sp|Q2G1Y5|LDH2_STAA8 L-lactate dehydrogenase 2 OS=Staphylococcus aureus (strain NCTC 8325) GN=ldh2 PE=3 SV=1 UPId=UP000008816 PPId=UP000008816
0.517594	-0.422968	-0.0631359	4	1926000000	0.0119224	0.0104969	Q2FXT0	>sp|Q2FXT0|RL27_STAA8 50S ribosomal protein L27 OS=Staphylococcus aureus (strain NCTC 8325) GN=rpmA PE=1 SV=1 UPId=UP000008816 PPId=UP000008816
0.48698	-0.340801	-0.113533	7	2006200000	0.0137424	0.0108822	Q2FW21	>sp|Q2FW21|RL6_STAA8 50S ribosomal protein L6 OS=Staphylococcus aureus (strain NCTC 8325) GN=rplF PE=1 SV=1 UPId=UP000008816 PPId=UP000008816
-0.622463	0.649082	NaN	2	269990000	0.00582601	0.0133095	Q2FWD0	>sp|Q2FWD0|RPOE_STAA8 Probable DNA-directed RNA polymerase subunit delta OS=Staphylococcus aureus (strain NCTC 8325) GN=rpoE PE=3 SV=1 UPId=UP000008816 PPId=UP000008816
0.465124	-0.0535466	-0.348675	15	10045000000	0.0278953	0.0209677	Q2FZU0	>sp|Q2FZU0|G6PI_STAA8 Glucose-6-phosphate isomerase OS=Staphylococcus aureus (strain NCTC 8325) GN=pgi PE=3 SV=1 UPId=UP000008816 PPId=UP000008816
-0.144242	-0.272642	0.485555	2	657340000	0.0310143	0.0228904	Q2G000	>tr|Q2G000|Q2G000_STAA8 Thioredoxin, putative OS=Staphylococcus aureus (strain NCTC 8325) GN=SAOUHSC_00834 PE=1 SV=1 UPId=UP000008816 PPId=UP000008816
-0.0922481	-0.23646	0.397853	13	3814700000	0.0383853	0.0230483	Q2FXE8	>tr|Q2FXE8|Q2FXE8_STAA8 Transaldolase OS=Staphylococcus aureus (strain NCTC 8325) GN=SAOUHSC_01901 PE=4 SV=1 UPId=UP000008816 PPId=UP000008816
0.233314	-0.412033	0.252122	12	13383000000	0.0357402	0.0244674	Q2G0F2	>tr|Q2G0F2|Q2G0F2_STAA8 Uncharacterized protein OS=Staphylococcus aureus (strain NCTC 8325) GN=SAOUHSC_00617 PE=4 SV=1 UPId=UP000008816 PPId=UP000008816
0.336632	0.0848692	-0.336866	1	315630000	0.0462466	0.0282116	Q2FYN2	>sp|Q2FYN2|CSPA_STAA8 Cold shock protein CspA OS=Staphylococcus aureus (strain NCTC 8325) GN=cspA PE=1 SV=1 UPId=UP000008816 PPId=UP000008816
0.0499559	-0.102151	0.141579	9	2497600000	0.145203	0.0297949	Q2G0P0	>sp|Q2G0P0|RL1_STAA8 50S ribosomal protein L1 OS=Staphylococcus aureus (strain NCTC 8325) GN=rplA PE=3 SV=1 UPId=UP000008816 PPId=UP000008816
0.273453	-0.296062	0.135114	11	2424100000	0.0720192	0.0375018	O05204	>sp|O05204|AHPF_STAA8 Alkyl hydroperoxide reductase subunit F OS=Staphylococcus aureus (strain NCTC 8325) GN=ahpF PE=3 SV=1 UPId=UP000008816 PPId=UP000008816
0.0483621	0.0776097	-0.0121239	8	1458300000	0.541452	0.0379493	Q2FXH2	>sp|Q2FXH2|SYL_STAA8 Leucine--tRNA ligase OS=Staphylococcus aureus (strain NCTC 8325) GN=leuS PE=3 SV=1 UPId=UP000008816 PPId=UP000008816
0.214623	NaN	-0.131731	4	360380000	0.0703501	0.041446	Q2FXI0	>tr|Q2FXI0|Q2FXI0_STAA8 D-alanine aminotransferase OS=Staphylococcus aureus (strain NCTC 8325) GN=SAOUHSC_01867 PE=3 SV=1 UPId=UP000008816 PPId=UP000008816
0.158799	-0.0289754	0.00849925	5	2243700000	0.295894	0.0461076	Q2G0Q1	>sp|Q2G0Q1|PDXS_STAA8 Pyridoxal 5-phosphate synthase subunit PdxS OS=Staphylococcus aureus (strain NCTC 8325) GN=pdxS PE=3 SV=1 UPId=UP000008816 PPId=UP000008816
0.177365	-0.0062585	-0.0298264	14	9973800000	0.262208	0.0470933	Q2FZ36	>tr|Q2FZ36|Q2FZ36_STAA8 Succinyl-CoA ligase [ADP-forming] subunit alpha OS=Staphylococcus aureus (strain NCTC 8325) GN=SAOUHSC_01218 PE=3 SV=1 UPId=UP000008816 PPId=UP000008816
0.437365	-0.517242	0.227377	10	5062200000	0.0551155	0.0491668	Q2FZH5	>tr|Q2FZH5|Q2FZH5_STAA8 Phosphoenolpyruvate-protein phosphotransferase OS=Staphylococcus aureus (strain NCTC 8325) GN=SAOUHSC_01029 PE=3 SV=1 UPId=UP000008816 PPId=UP000008816
0.390792	-0.288385	0.0540049	10	1131800000	0.0887335	0.0521373	Q2FY35	>sp|Q2FY35|GCSPB_STAA8 Probable glycine dehydrogenase (decarboxylating) subunit 2 OS=Staphylococcus aureus (strain NCTC 8325) GN=gcvPB PE=3 SV=1 UPId=UP000008816 PPId=UP000008816
0.156472	0.180846	-0.159088	6	2388300000	0.192641	0.0594099	Q2FX94	>tr|Q2FX94|Q2FX94_STAA8 Fumarate hydratase class II OS=Staphylococcus aureus (strain NCTC 8325) GN=fumC PE=3 SV=1 UPId=UP000008816 PPId=UP000008816
-0.170534	0.295581	NaN	3	58970000	0.0792816	0.0625232	Q2FZ59	>tr|Q2FZ59|Q2FZ59_STAA8 Uncharacterized protein OS=Staphylococcus aureus (strain NCTC 8325) GN=SAOUHSC_01192 PE=4 SV=1 UPId=UP000008816 PPId=UP000008816
0.106513	-0.108402	0.202776	14	18159000000	0.265756	0.0669623	Q2G032	>tr|Q2G032|Q2G032_STAA8 Glyceraldehyde-3-phosphate dehydrogenase OS=Staphylococcus aureus (strain NCTC 8325) GN=SAOUHSC_00795 PE=3 SV=1 UPId=UP000008816 PPId=UP000008816
0.0163594	-0.914579	1.10205	4	1014800000	0.0372358	0.0679419	Q2FVQ2	>sp|Q2FVQ2|Y2650_STAA8 Uncharacterized lipoprotein SAOUHSC_02650 OS=Staphylococcus aureus (strain NCTC 8325) GN=SAOUHSC_02650 PE=3 SV=1 UPId=UP000008816 PPId=UP000008816
-0.361451	0.226159	0.348893	4	2171600000	0.110052	0.0712004	Q2FZZ9	>tr|Q2FZZ9|Q2FZZ9_STAA8 Uncharacterized protein OS=Staphylococcus aureus (strain NCTC 8325) GN=SAOUHSC_00835 PE=3 SV=1 UPId=UP000008816 PPId=UP000008816
0.381999	-0.438575	0.278097	2	3247900000	0.0960347	0.0738402	Q2FXY6	>sp|Q2FXY6|RS20_STAA8 30S ribosomal protein S20 OS=Staphylococcus aureus (strain NCTC 8325) GN=rpsT PE=3 SV=1 UPId=UP000008816 PPId=UP000008816
0.34108	-0.373812	0.263988	12	5535300000	0.115731	0.0770855	Q2FWD3	>tr|Q2FWD3|Q2FWD3_STAA8 Uncharacterized protein OS=Staphylococcus aureus (strain NCTC 8325) GN=SAOUHSC_02366 PE=3 SV=1 UPId=UP000008816 PPId=UP000008816
-0.101005	NaN	0.267633	2	992130000	0.136832	0.0833141	Q2FZU7	>tr|Q2FZU7|Q2FZU7_STAA8 FMN oxidoreductase, putative OS=Staphylococcus aureus (strain NCTC 8325) GN=SAOUHSC_00893 PE=4 SV=1 UPId=UP000008816 PPId=UP000008816
0.250782	0.101643	-0.0977737	9	2260500000	0.310686	0.0848838	Q2FWE5	>sp|Q2FWE5|GLYA_STAA8 Serine hydroxymethyltransferase OS=Staphylococcus aureus (strain NCTC 8325) GN=glyA PE=3 SV=1 UPId=UP000008816 PPId=UP000008816
0.154144	-0.762554	0.877105	5	1209500000	0.0616392	0.0895652	Q2G2U9	>sp|Q2G2U9|SARA_STAA8 Transcriptional regulator SarA OS=Staphylococcus aureus (strain NCTC 8325) GN=sarA PE=1 SV=3 UPId=UP000008816 PPId=UP000008816
-0.638829	NaN	0.82052	3	71310000	0.0356717	0.0908455	Q2FXN4	>tr|Q2FXN4|Q2FXN4_STAA8 Isocitrate dehydrogenase [NADP] OS=Staphylococcus aureus (strain NCTC 8325) GN=SAOUHSC_01801 PE=3 SV=1 UPId=UP000008816 PPId=UP000008816
0.247749	0.07827	-0.0529175	4	441840000	0.392178	0.0910339	A0A0U0	>tr|A0A0U0VKA9|A0A0U0VKA9_STAHA Dihydrolipoamide succinyltransferase E2 component of 2-oxoglutarate dehydrogenase complex OS=Staphylococcus haemolyticus GN=odhB PE=3 SV=1 UPId=UP000046272 PPId=UP000008816;>sp|Q2FYM2|ODO2_STAA8 Dihydrolipoyllysine-residue s
0.240918	0.0960608	-0.0615698	21	21107000000	0.394148	0.0918029	Q2G028	>sp|Q2G028|ENO_STAA8 Enolase OS=Staphylococcus aureus (strain NCTC 8325) GN=eno PE=1 SV=1 UPId=UP000008816 PPId=UP000008816
-0.752132	1.02342	0.00493189	3	601140000	0.0582718	0.092074	Q2FW23	>sp|Q2FW23|RS5_STAA8 30S ribosomal protein S5 OS=Staphylococcus aureus (strain NCTC 8325) GN=rpsE PE=3 SV=1 UPId=UP000008816 PPId=UP000008816
0.0583114	0.648799	-0.395846	9	3879800000	0.116769	0.103755	Q2FZG4	>tr|Q2FZG4|Q2FZG4_STAA8 Pyruvate dehydrogenase complex, E1 component, alpha subunit, putative OS=Staphylococcus aureus (strain NCTC 8325) GN=SAOUHSC_01040 PE=4 SV=1 UPId=UP000008816 PPId=UP000008816
0.0974697	-0.0959094	0.352471	4	1107900000	0.337851	0.11801	Q2FZS0	>sp|Q2FZS0|FABH_STAA8 3-oxoacyl-[acyl-carrier-protein] synthase 3 OS=Staphylococcus aureus (strain NCTC 8325) GN=fabH PE=3 SV=1 UPId=UP000008816 PPId=UP000008816
0.354766	-0.265014	0.277188	2	192050000	0.225863	0.122313	Q2FZ94	>tr|Q2FZ94|Q2FZ94_STAA8 Penicillin-binding protein 1 OS=Staphylococcus aureus (strain NCTC 8325) GN=SAOUHSC_01145 PE=4 SV=1 UPId=UP000008816 PPId=UP000008816;>tr|A0A0U0VSY8|A0A0U0VSY8_STAHA Cell division protein FtsI (Peptidoglycan synthetase) OS=Staphyloc
0.265155	0.176348	-0.0692095	6	2562900000	0.467992	0.124098	Q2G0M7	>sp|Q2G0M7|HCHA_STAA8 Protein deglycase HchA OS=Staphylococcus aureus (strain NCTC 8325) GN=hchA PE=3 SV=1 UPId=UP000008816 PPId=UP000008816;>tr|A0A0U0VQ09|A0A0U0VQ09_STAHA Chaperone protein hchA OS=Staphylococcus haemolyticus GN=hchA PE=4 SV=1 UPId=UP0000
0.687034	-0.127222	-0.151897	21	6875700000	0.173516	0.135972	Q2FZ23	>sp|Q2FZ23|EFTS_STAA8 Elongation factor Ts OS=Staphylococcus aureus (strain NCTC 8325) GN=tsf PE=3 SV=1 UPId=UP000008816 PPId=UP000008816
1.10336	-0.230704	-0.444039	4	1262300000	0.0992266	0.142872	Q2FXW7	>sp|Q2FXW7|GREA_STAA8 Transcription elongation factor GreA OS=Staphylococcus aureus (strain NCTC 8325) GN=greA PE=3 SV=1 UPId=UP000008816 PPId=UP000008816
NaN	-0.546053	0.835838	2	143310000	0.0612769	0.144893	Q2FXZ9	>sp|Q2FXZ9|Y1676_STAA8 UPF0365 protein SAOUHSC_01676 OS=Staphylococcus aureus (strain NCTC 8325) GN=SAOUHSC_01676 PE=3 SV=1 UPId=UP000008816 PPId=UP000008816
-0.164775	0.445541	0.158401	5	274560000	0.306581	0.146389	Q2FXM8	>sp|Q2FXM8|PFKA_STAA8 ATP-dependent 6-phosphofructokinase OS=Staphylococcus aureus (strain NCTC 8325) GN=pfkA PE=1 SV=2 UPId=UP000008816 PPId=UP000008816
0.158799	-0.382496	0.667377	12	5364100000	0.171427	0.147893	Q2FZ37	>sp|Q2FZ37|SUCC_STAA8 Succinyl-CoA ligase [ADP-forming] subunit beta OS=Staphylococcus aureus (strain NCTC 8325) GN=sucC PE=3 SV=1 UPId=UP000008816 PPId=UP000008816
-0.0130673	0.469946	0.0146634	10	425380000	0.375518	0.157181	Q2FWC1	>sp|Q2FWC1|PDP_STAA8 Pyrimidine-nucleoside phosphorylase OS=Staphylococcus aureus (strain NCTC 8325) GN=pdp PE=3 SV=1 UPId=UP000008816 PPId=UP000008816
-0.0361946	-0.51627	1.05125	2	596600000	0.122495	0.166263	Q2FWB9	>tr|Q2FWB9|Q2FWB9_STAA8 Deoxyribose-phosphate aldolase OS=Staphylococcus aureus (strain NCTC 8325) GN=deoC PE=3 SV=1 UPId=UP000008816 PPId=UP000008816
0.88539	0.414051	-0.788649	3	483140000	0.116233	0.170264	Q2FZV6	>tr|Q2FZV6|Q2FZV6_STAA8 Leucine aminopeptidase 2, chloroplastic OS=Staphylococcus aureus (strain NCTC 8325) GN=SAOUHSC_00879 PE=3 SV=1 UPId=UP000008816 PPId=UP000008816
0.41087	-0.0628036	NaN	1	76947000	0.224344	0.174033	Q2FZ29	>sp|Q2FZ29|HSLV_STAA8 ATP-dependent protease subunit HslV OS=Staphylococcus aureus (strain NCTC 8325) GN=hslV PE=3 SV=1 UPId=UP000008816 PPId=UP000008816
0.395181	-0.143681	0.271731	16	6452900000	0.401638	0.17441	Q2G296	>sp|Q2G296|FTHS_STAA8 Formate--tetrahydrofolate ligase OS=Staphylococcus aureus (strain NCTC 8325) GN=fhs PE=3 SV=1 UPId=UP000008816 PPId=UP000008816
-0.0781614	-0.639262	1.28082	3	1310700000	0.11176	0.187799	Q2FYF1	>sp|Q2FYF1|EBPS_STAA8 Elastin-binding protein EbpS OS=Staphylococcus aureus (strain NCTC 8325) GN=ebpS PE=1 SV=1 UPId=UP000008816 PPId=UP000008816
NaN	-0.654574	1.04087	2	260300000	0.0668246	0.19315	Q2FXG2	>sp|Q2FXG2|RISB_STAA8 6,7-dimethyl-8-ribityllumazine synthase OS=Staphylococcus aureus (strain NCTC 8325) GN=ribH PE=3 SV=1 UPId=UP000008816 PPId=UP000008816
0.765152	-0.132466	-0.0484752	33	7076800000	0.246811	0.194737	Q2G0N5	>sp|Q2G0N5|RPOC_STAA8 DNA-directed RNA polymerase subunit beta OS=Staphylococcus aureus (strain NCTC 8325) GN=rpoC PE=3 SV=2 UPId=UP000008816 PPId=UP000008816
-0.383125	NaN	0.782405	4	219560000	0.102435	0.19964	Q2FYF3	>tr|Q2FYF3|Q2FYF3_STAA8 Uncharacterized protein OS=Staphylococcus aureus (strain NCTC 8325) GN=SAOUHSC_01499 PE=4 SV=1 UPId=UP000008816 PPId=UP000008816
0.834252	0.31544	-0.548655	10	32743000000	0.174825	0.200346	Q2FYG2	>tr|Q2FYG2|Q2FYG2_STAA8 DNA-binding protein HU, putative OS=Staphylococcus aureus (strain NCTC 8325) GN=SAOUHSC_01490 PE=3 SV=1 UPId=UP000008816 PPId=UP000008816
0.216534	-0.255592	0.644776	23	22159000000	0.285082	0.201906	Q2FV17	>sp|Q2FV17|ALF1_STAA8 Fructose-bisphosphate aldolase class 1 OS=Staphylococcus aureus (strain NCTC 8325) GN=fda PE=3 SV=1 UPId=UP000008816 PPId=UP000008816
0.260999	-0.15493	0.506357	13	5173600000	0.396784	0.204142	Q2FYF9	>tr|Q2FYF9|Q2FYF9_STAA8 30S ribosomal protein S1, putative OS=Staphylococcus aureus (strain NCTC 8325) GN=SAOUHSC_01493 PE=4 SV=1 UPId=UP000008816 PPId=UP000008816
-0.601993	0.815243	0.402278	3	237830000	0.171295	0.205176	Q2FXP9	>sp|Q2FXP9|IF3_STAA8 Translation initiation factor IF-3 OS=Staphylococcus aureus (strain NCTC 8325) GN=infC PE=3 SV=1 UPId=UP000008816 PPId=UP000008816
-0.154118	1.49625	-0.718	6	669720000	0.105792	0.208043	Q2G0P2	>sp|Q2G0P2|NUSG_STAA8 Transcription termination/antitermination protein NusG OS=Staphylococcus aureus (strain NCTC 8325) GN=nusG PE=3 SV=1 UPId=UP000008816 PPId=UP000008816
-0.0060741	-0.00119188	0.640579	6	1735900000	0.367315	0.211104	Q2G2F3	>sp|Q2G2F3|TRAP_STAA8 Signal transduction protein TRAP OS=Staphylococcus aureus (strain NCTC 8325) GN=traP PE=1 SV=1 UPId=UP000008816 PPId=UP000008816
0.790417	-0.156338	0.00874024	5	2376600000	0.26808	0.214273	Q2FVK8	>sp|Q2FVK8|GPMA_STAA8 2,3-bisphosphoglycerate-dependent phosphoglycerate mutase OS=Staphylococcus aureus (strain NCTC 8325) GN=gpmA PE=3 SV=1 UPId=UP000008816 PPId=UP000008816
0.0195708	NaN	0.415527	4	239210000	0.327867	0.217549	Q2G0K7	>sp|Q2G0K7|HPS_STAA8 3-hexulose-6-phosphate synthase OS=Staphylococcus aureus (strain NCTC 8325) GN=SAOUHSC_00553 PE=3 SV=1 UPId=UP000008816 PPId=UP000008816;>sp|Q5HRH7|HPS_STAEQ 3-hexulose-6-phosphate synthase OS=Staphylococcus epidermidis (strain ATCC 35
0.0718026	-0.208485	0.790541	3	868660000	0.267582	0.217953	Q2G1T9	>sp|Q2G1T9|RPOZ_STAA8 DNA-directed RNA polymerase subunit omega OS=Staphylococcus aureus (strain NCTC 8325) GN=rpoZ PE=3 SV=1 UPId=UP000008816 PPId=UP000008816
0.34071	0.366147	-0.0266203	16	4825100000	0.665806	0.226746	Q2FY60	>tr|Q2FY60|Q2FY60_STAA8 6-phosphogluconate dehydrogenase, decarboxylating OS=Staphylococcus aureus (strain NCTC 8325) GN=SAOUHSC_01605 PE=3 SV=1 UPId=UP000008816 PPId=UP000008816
-0.277371	-0.096949	1.05893	3	415940000	0.193599	0.228203	Q2G1M1	>tr|Q2G1M1|Q2G1M1_STAA8 3-ketoacyl-acyl carrier protein reductase, putative OS=Staphylococcus aureus (strain NCTC 8325) GN=SAOUHSC_00086 PE=4 SV=1 UPId=UP000008816 PPId=UP000008816
0.108083	-0.310106	0.910884	9	3383700000	0.238576	0.236287	Q2FW18	>sp|Q2FW18|RL5_STAA8 50S ribosomal protein L5 OS=Staphylococcus aureus (strain NCTC 8325) GN=rplE PE=1 SV=1 UPId=UP000008816 PPId=UP000008816
0.0702179	0.405608	NaN	2	141530000	0.407966	0.237913	Q2G223	>tr|Q2G223|Q2G223_STAA8 Mannose-6-phosphate isomerase, class I OS=Staphylococcus aureus (strain NCTC 8325) GN=SAOUHSC_02976 PE=3 SV=1 UPId=UP000008816 PPId=UP000008816
0.0903785	0.0891526	0.559235	4	1215600000	0.591376	0.246255	Q2FZ74	>tr|Q2FZ74|Q2FZ74_STAA8 Dihydroorotase OS=Staphylococcus aureus (strain NCTC 8325) GN=pyrC PE=3 SV=1 UPId=UP000008816 PPId=UP000008816
0.514401	-0.663306	0.895417	2	617980000	0.187866	0.248837	Q2FZJ7	>tr|Q2FZJ7|Q2FZJ7_STAA8 Uncharacterized protein OS=Staphylococcus aureus (strain NCTC 8325) GN=SAOUHSC_01005 PE=4 SV=1 UPId=UP000008816 PPId=UP000008816
-0.10208	0.041092	0.814863	4	2072900000	0.327287	0.251292	Q2G189	>tr|Q2G189|Q2G189_STAA8 ESAT-6-like protein OS=Staphylococcus aureus (strain NCTC 8325) GN=SAOUHSC_00257 PE=3 SV=1 UPId=UP000008816 PPId=UP000008816
-0.316791	1.30224	-0.229447	2	3561700000	0.168135	0.252002	Q2G055	>sp|Q2G055|HPF_STAA8 Ribosome hibernation promotion factor OS=Staphylococcus aureus (strain NCTC 8325) GN=hpf PE=1 SV=1 UPId=UP000008816 PPId=UP000008816;>tr|A0A0W3BEM7|A0A0W3BEM7_STAHA Fis family transcriptional regulator OS=Staphylococcus haemolyticus GN
0.337003	-0.0265953	0.461167	8	6777100000	0.655738	0.257191	Q2FXS8	>sp|Q2FXS8|RL21_STAA8 50S ribosomal protein L21 OS=Staphylococcus aureus (strain NCTC 8325) GN=rplU PE=1 SV=1 UPId=UP000008816 PPId=UP000008816
0.430486	0.810653	-0.457673	4	346260000	0.252608	0.261155	Q2G2H4	>tr|Q2G2H4|Q2G2H4_STAA8 DNA polymerase III subunit beta OS=Staphylococcus aureus (strain NCTC 8325) GN=SAOUHSC_00002 PE=4 SV=1 UPId=UP000008816 PPId=UP000008816;>sp|Q5HK00|DPO3B_STAEQ DNA polymerase III subunit beta OS=Staphylococcus epidermidis (strain AT
-0.574364	0.525873	0.833423	6	582380000	0.219905	0.261644	Q2G2D0	>sp|Q2G2D0|IF2_STAA8 Translation initiation factor IF-2 OS=Staphylococcus aureus (strain NCTC 8325) GN=infB PE=3 SV=1 UPId=UP000008816 PPId=UP000008816
-0.325482	0.152479	0.959327	3	3719300000	0.254261	0.262108	Q2FW28	>sp|Q2FW28|IF1_STAA8 Translation initiation factor IF-1 OS=Staphylococcus aureus (strain NCTC 8325) GN=infA PE=3 SV=1 UPId=UP000008816 PPId=UP000008816
-0.123605	0.129105	0.786881	11	4756600000	0.363456	0.264127	Q2G0Q8	>tr|Q2G0Q8|Q2G0Q8_STAA8 Cysteine synthase OS=Staphylococcus aureus (strain NCTC 8325) GN=SAOUHSC_00488 PE=3 SV=1 UPId=UP000008816 PPId=UP000008816
0.979757	-0.902329	0.726693	2	3516500000	0.158626	0.268041	Q2G1W1	>tr|Q2G1W1|Q2G1W1_STAA8 Secretory antigen SsaA, putative OS=Staphylococcus aureus (strain NCTC 8325) GN=SAOUHSC_02576 PE=4 SV=1 UPId=UP000008816 PPId=UP000008816
-0.0347707	1.06498	-0.224222	7	534630000	0.242112	0.268662	Q2FY66	>tr|Q2FY66|Q2FY66_STAA8 Glucose-6-phosphate 1-dehydrogenase OS=Staphylococcus aureus (strain NCTC 8325) GN=zwf PE=3 SV=1 UPId=UP000008816 PPId=UP000008816
0.137031	-0.282109	0.960111	3	1390400000	0.272364	0.271678	Q2FY42	>tr|Q2FY42|Q2FY42_STAA8 Acetyl-CoA carboxylase, biotin carboxyl carrier protein OS=Staphylococcus aureus (strain NCTC 8325) GN=SAOUHSC_01624 PE=4 SV=1 UPId=UP000008816 PPId=UP000008816
-0.104356	-0.403769	1.32409	6	3370300000	0.180032	0.271987	Q2G260	>sp|Q2G260|Y094_STAA8 Uncharacterized protein SAOUHSC_00094 OS=Staphylococcus aureus (strain NCTC 8325) GN=SAOUHSC_00094 PE=1 SV=1 UPId=UP000008816 PPId=UP000008816
0.260999	0.451806	0.107561	10	4492200000	0.954876	0.273456	Q2FZ21	>sp|Q2FZ21|RRF_STAA8 Ribosome-recycling factor OS=Staphylococcus aureus (strain NCTC 8325) GN=frr PE=3 SV=1 UPId=UP000008816 PPId=UP000008816
0.935568	-0.159157	0.0583925	5	750530000	0.307076	0.278268	Q2FXS6	>tr|Q2FXS6|Q2FXS6_STAA8 Cell shape-determining protein MreC OS=Staphylococcus aureus (strain NCTC 8325) GN=SAOUHSC_01759 PE=3 SV=1 UPId=UP000008816 PPId=UP000008816
0.321768	0.545392	-0.0293404	4	266420000	0.625363	0.279273	Q2G0Z2	>tr|Q2G0Z2|Q2G0Z2_STAA8 Uncharacterized protein OS=Staphylococcus aureus (strain NCTC 8325) GN=SAOUHSC_00369 PE=4 SV=1 UPId=UP000008816 PPId=UP000008816;>tr|A0A0U1MHU4|A0A0U1MHU4_STAAU Uncharacterized protein OS=Staphylococcus aureus GN=BN1326_30254 PE=4 S
0.442065	0.124216	NaN	2	215630000	0.487299	0.283141	A0A0H3	>tr|A0A0H3JQG5|A0A0H3JQG5_STAAM Probable autolysin (N-acetylmuramoyl-L-alanine amidase) OS=Staphylococcus aureus (strain Mu50 / ATCC 700699) GN=SAV0465 PE=4 SV=1 UPId=UP000002481 PPId=UP000008816;>sp|Q2G0U9|SLE1_STAA8 N-acetylmuramoyl-L-alanine amidase sle
-0.0726555	NaN	0.643098	2	87971000	0.242893	0.285221	A0A0U0	>tr|A0A0U0VE99|A0A0U0VE99_STAHA GTP-binding protein YqeH%2C possibly involved in replication initiation OS=Staphylococcus haemolyticus GN=yqeH PE=4 SV=1 UPId=UP000046272 PPId=UP000008816;>tr|Q2FXY0|Q2FXY0_STAA8 Uncharacterized protein OS=Staphylococcus aur
0.607716	-0.28864	0.53996	6	1367800000	0.371531	0.286345	Q2FZU9	>sp|Q2FZU9|PPI1_STAA8 Putative peptidyl-prolyl cis-trans isomerase OS=Staphylococcus aureus (strain NCTC 8325) GN=SAOUHSC_00891 PE=3 SV=1 UPId=UP000008816 PPId=UP000008816;>sp|Q5HHD1|PPI1_STAAC Putative peptidyl-prolyl cis-trans isomerase OS=Staphylococcus
-0.2566	0.191107	0.94913	7	2102600000	0.309228	0.294545	Q2FZX0	>sp|Q2FZX0|NAGD_STAA8 Acid sugar phosphatase OS=Staphylococcus aureus (strain NCTC 8325) GN=nagD PE=3 SV=1 UPId=UP000008816 PPId=UP000008816
0.170026	-0.0137019	0.732871	2	320220000	0.497934	0.296398	Q2FYK7	>tr|Q2FYK7|Q2FYK7_STAA8 Uncharacterized protein OS=Staphylococcus aureus (strain NCTC 8325) GN=SAOUHSC_01433 PE=4 SV=1 UPId=UP000008816 PPId=UP000008816;>tr|A0A0T7MUH5|A0A0T7MUH5_STAAU DegV domain-containing protein OS=Staphylococcus aureus GN=ERS179246_01
0.432297	0.120953	0.368539	17	4311000000	1.07733	0.307263	Q2G0P5	>sp|Q2G0P5|CLPC_STAA8 ATP-dependent Clp protease ATP-binding subunit ClpC OS=Staphylococcus aureus (strain NCTC 8325) GN=clpC PE=1 SV=1 UPId=UP000008816 PPId=UP000008816
0.614299	0.662049	-0.333076	5	1378900000	0.362264	0.314424	P48940	>sp|P48940|RS7_STAA8 30S ribosomal protein S7 OS=Staphylococcus aureus (strain NCTC 8325) GN=rpsG PE=3 SV=2 UPId=UP000008816 PPId=UP000008816
-0.223598	-1.05961	2.23434	5	243940000	0.108553	0.317042	Q2FVX8	>tr|Q2FVX8|Q2FVX8_STAA8 Molybdenum cofactor biosynthesis protein B OS=Staphylococcus aureus (strain NCTC 8325) GN=SAOUHSC_02544 PE=3 SV=1 UPId=UP000008816 PPId=UP000008816
-0.324389	0.966403	NaN	2	255680000	0.151092	0.321007	Q2G270	>tr|Q2G270|Q2G270_STAA8 Uncharacterized protein OS=Staphylococcus aureus (strain NCTC 8325) GN=SAOUHSC_02568 PE=4 SV=1 UPId=UP000008816 PPId=UP000008816
-0.0125414	0.823598	0.152614	12	2524300000	0.473868	0.321223	Q2G2C1	>tr|Q2G2C1|Q2G2C1_STAA8 Pyruvate carboxylase OS=Staphylococcus aureus (strain NCTC 8325) GN=SAOUHSC_01064 PE=4 SV=1 UPId=UP000008816 PPId=UP000008816
0.46153	0.599323	-0.0756344	25	3339600000	0.599006	0.328406	Q2FXM9	>sp|Q2FXM9|KPYK_STAA8 Pyruvate kinase OS=Staphylococcus aureus (strain NCTC 8325) GN=pyk PE=3 SV=1 UPId=UP000008816 PPId=UP000008816
0.063078	1.05716	-0.120318	3	363460000	0.338789	0.333307	Q2FY59	>tr|Q2FY59|Q2FY59_STAA8 Peptidase T, putative OS=Staphylococcus aureus (strain NCTC 8325) GN=SAOUHSC_01606 PE=4 SV=1 UPId=UP000008816 PPId=UP000008816
0.637428	0.794136	-0.386278	4	1000400000	0.350777	0.348429	P0A0F8	>sp|P0A0F8|RL15_STAA8 50S ribosomal protein L15 OS=Staphylococcus aureus (strain NCTC 8325) GN=rplO PE=1 SV=1 UPId=UP000008816 PPId=UP000008816
0.367301	-0.215995	0.894224	3	336720000	0.408259	0.34851	Q2FZ75	>sp|Q2FZ75|PYRB_STAA8 Aspartate carbamoyltransferase OS=Staphylococcus aureus (strain NCTC 8325) GN=pyrB PE=3 SV=1 UPId=UP000008816 PPId=UP000008816
-0.353122	0.61646	0.783219	6	337120000	0.367964	0.348852	Q2FVX4	>tr|Q2FVX4|Q2FVX4_STAA8 Molybdenum ABC transporter, periplasmic molybdate-binding protein OS=Staphylococcus aureus (strain NCTC 8325) GN=SAOUHSC_02549 PE=4 SV=1 UPId=UP000008816 PPId=UP000008816
0.0579138	NaN	0.645616	3	385410000	0.353552	0.351765	Q2FXK6	>sp|Q2FXK6|RS4_STAA8 30S ribosomal protein S4 OS=Staphylococcus aureus (strain NCTC 8325) GN=rpsD PE=3 SV=1 UPId=UP000008816 PPId=UP000008816
0.53811	0.397144	0.122064	9	2947200000	0.991052	0.352439	Q2FZ54	>tr|Q2FZ54|Q2FZ54_STAA8 Malonyl CoA-acyl carrier protein transacylase OS=Staphylococcus aureus (strain NCTC 8325) GN=SAOUHSC_01198 PE=3 SV=1 UPId=UP000008816 PPId=UP000008816
0.411598	-0.12024	0.782405	36	14426000000	0.51547	0.357921	Q2FZK7	>sp|Q2FZK7|ATL_STAA8 Bifunctional autolysin OS=Staphylococcus aureus (strain NCTC 8325) GN=atl PE=1 SV=1 UPId=UP000008816 PPId=UP000008816
0.554658	-0.247999	0.777516	10	3539300000	0.436937	0.361392	Q2FZR9	>tr|Q2FZR9|Q2FZR9_STAA8 3-oxoacyl-[acyl-carrier-protein] synthase 2 OS=Staphylococcus aureus (strain NCTC 8325) GN=SAOUHSC_00921 PE=3 SV=1 UPId=UP000008816 PPId=UP000008816
1.03845	-0.444936	0.517154	5	2071900000	0.315239	0.370223	P0A0J3	>sp|P0A0J3|SODM1_STAA8 Superoxide dismutase [Mn] 1 OS=Staphylococcus aureus (strain NCTC 8325) GN=sodA PE=1 SV=1 UPId=UP000008816 PPId=UP000008816
0.803981	0.156684	0.155088	12	5604900000	0.643428	0.371918	Q2FVA3	>tr|Q2FVA3|Q2FVA3_STAA8 D-lactate dehydrogenase, putative OS=Staphylococcus aureus (strain NCTC 8325) GN=SAOUHSC_02830 PE=3 SV=1 UPId=UP000008816 PPId=UP000008816
0.254191	-0.755781	1.64718	4	542730000	0.194783	0.381863	Q2FW31	>sp|Q2FW31|RS11_STAA8 30S ribosomal protein S11 OS=Staphylococcus aureus (strain NCTC 8325) GN=rpsK PE=3 SV=1 UPId=UP000008816 PPId=UP000008816
0.459012	0.0809112	0.612779	19	10560000000	0.867809	0.384234	Q2FXZ2	>sp|Q2FXZ2|DNAK_STAA8 Chaperone protein DnaK OS=Staphylococcus aureus (strain NCTC 8325) GN=dnaK PE=3 SV=1 UPId=UP000008816 PPId=UP000008816
-0.313041	1.19005	0.279006	7	342500000	0.326943	0.385338	Q2FZ20	>sp|Q2FZ20|PNP_STAA8 Polyribonucleotide nucleotidyltransferase OS=Staphylococcus aureus (strain NCTC 8325) GN=pnp PE=1 SV=1 UPId=UP000008816 PPId=UP000008816
0.390792	NaN	0.397853	4	424910000	2.24416	0.394322	Q2FXK7	>tr|Q2FXK7|Q2FXK7_STAA8 GAF domain protein OS=Staphylococcus aureus (strain NCTC 8325) GN=SAOUHSC_01828 PE=4 SV=1 UPId=UP000008816 PPId=UP000008816
-0.00369183	1.14177	0.065918	12	1502600000	0.406493	0.401331	Q2FXR8	>sp|Q2FXR8|SYV_STAA8 Valine--tRNA ligase OS=Staphylococcus aureus (strain NCTC 8325) GN=valS PE=3 SV=1 UPId=UP000008816 PPId=UP000008816
-0.217592	-0.200633	1.63333	7	1322000000	0.238548	0.405035	Q2FWD1	>sp|Q2FWD1|PYRG_STAA8 CTP synthase OS=Staphylococcus aureus (strain NCTC 8325) GN=pyrG PE=3 SV=1 UPId=UP000008816 PPId=UP000008816
0.312449	0.0230302	0.891044	10	1335700000	0.601591	0.408841	Q2FY33	>sp|Q2FY33|GCST_STAA8 Aminomethyltransferase OS=Staphylococcus aureus (strain NCTC 8325) GN=gcvT PE=3 SV=1 UPId=UP000008816 PPId=UP000008816
-0.0383923	NaN	0.882686	2	337530000	0.277636	0.422147	Q2FUY2	>sp|Q2FUY2|CLFB_STAA8 Clumping factor B OS=Staphylococcus aureus (strain NCTC 8325) GN=clfB PE=1 SV=1 UPId=UP000008816 PPId=UP000008816
-0.985531	0.85656	1.40693	6	372750000	0.210694	0.425985	Q2FW07	>sp|Q2FW07|RL4_STAA8 50S ribosomal protein L4 OS=Staphylococcus aureus (strain NCTC 8325) GN=rplD PE=1 SV=1 UPId=UP000008816 PPId=UP000008816
0.245094	0.39442	0.656509	2	1184300000	1.15806	0.432008	Q2FW08	>sp|Q2FW08|RL23_STAA8 50S ribosomal protein L23 OS=Staphylococcus aureus (strain NCTC 8325) GN=rplW PE=1 SV=1 UPId=UP000008816 PPId=UP000008816
-0.874675	0.0500892	2.14139	3	301180000	0.173014	0.438936	Q2FWY9	>sp|Q2FWY9|GATA_STAA8 Glutamyl-tRNA(Gln) amidotransferase subunit A OS=Staphylococcus aureus (strain NCTC 8325) GN=gatA PE=3 SV=1 UPId=UP000008816 PPId=UP000008816
-0.0371307	0.917147	NaN	6	312850000	0.279213	0.440008	Q2FYP2	>tr|Q2FYP2|Q2FYP2_STAA8 ABC transporter, ATP-binding protein, putative OS=Staphylococcus aureus (strain NCTC 8325) GN=SAOUHSC_01392 PE=4 SV=1 UPId=UP000008816 PPId=UP000008816
0.322884	0.607902	0.408907	5	821350000	1.46958	0.446564	Q2FW17	>sp|Q2FW17|RL24_STAA8 50S ribosomal protein L24 OS=Staphylococcus aureus (strain NCTC 8325) GN=rplX PE=1 SV=1 UPId=UP000008816 PPId=UP000008816
0.945465	-0.585143	1.00067	4	143130000	0.323573	0.453664	Q2FXX8	>sp|Q2FXX8|MTNN_STAA8 5-methylthioadenosine/S-adenosylhomocysteine nucleosidase OS=Staphylococcus aureus (strain NCTC 8325) GN=mtnN PE=3 SV=1 UPId=UP000008816 PPId=UP000008816
1.07721	0.293402	0.0517141	9	1236300000	0.576326	0.474109	Q2G124	>sp|Q2G124|THLA_STAA8 Probable acetyl-CoA acyltransferase OS=Staphylococcus aureus (strain NCTC 8325) GN=SAOUHSC_00336 PE=3 SV=1 UPId=UP000008816 PPId=UP000008816
-0.0192216	1.82134	-0.37186	9	2582300000	0.255076	0.476753	Q2G0Y6	>sp|Q2G0Y6|GUAA_STAA8 GMP synthase [glutamine-hydrolyzing] OS=Staphylococcus aureus (strain NCTC 8325) GN=guaA PE=3 SV=1 UPId=UP000008816 PPId=UP000008816;>tr|C5QPG8|C5QPG8_9STAP GMP synthase [glutamine-hydrolyzing] OS=Staphylococcus caprae M23864:W1 GN=gu
-0.066829	1.03004	NaN	3	289590000	0.266605	0.481607	Q2G0S3	>sp|Q2G0S3|GLMU_STAA8 Bifunctional protein GlmU OS=Staphylococcus aureus (strain NCTC 8325) GN=glmU PE=3 SV=1 UPId=UP000008816 PPId=UP000008816
0.348854	0.780541	0.336346	3	760540000	1.10292	0.48858	Q9F0R1	>sp|Q9F0R1|SARR_STAA8 HTH-type transcriptional regulator SarR OS=Staphylococcus aureus (strain NCTC 8325) GN=sarR PE=1 SV=3 UPId=UP000008816 PPId=UP000008816
0.605981	1.48504	-0.573531	5	2234700000	0.313672	0.505829	Q2FYL0	>tr|Q2FYL0|Q2FYL0_STAA8 Phosphotransferase system enzyme IIA, putative OS=Staphylococcus aureus (strain NCTC 8325) GN=SAOUHSC_01430 PE=4 SV=1 UPId=UP000008816 PPId=UP000008816
0.679206	0.346256	0.514565	2	349030000	1.47735	0.513342	Q2FZ48	>tr|Q2FZ48|Q2FZ48_STAA8 Signal recognition particle receptor FtsY OS=Staphylococcus aureus (strain NCTC 8325) GN=ftsY PE=3 SV=1 UPId=UP000008816 PPId=UP000008816
0.292623	NaN	0.734106	3	237490000	0.587499	0.513364	Q2FZD9	>sp|Q2FZD9|SYFA_STAA8 Phenylalanine--tRNA ligase alpha subunit OS=Staphylococcus aureus (strain NCTC 8325) GN=pheS PE=3 SV=1 UPId=UP000008816 PPId=UP000008816
-0.137935	2.04509	-0.347842	4	408870000	0.246434	0.519772	Q2FZZ0	>tr|Q2FZZ0|Q2FZZ0_STAA8 Lipoprotein OS=Staphylococcus aureus (strain NCTC 8325) GN=SAOUHSC_00844 PE=3 SV=1 UPId=UP000008816 PPId=UP000008816
-1.01033	1.88628	0.713072	2	348680000	0.226761	0.529674	Q2FZ72	>sp|Q2FZ72|CARB_STAA8 Carbamoyl-phosphate synthase large chain OS=Staphylococcus aureus (strain NCTC 8325) GN=carB PE=3 SV=1 UPId=UP000008816 PPId=UP000008816;>tr|A0A0U0VMJ5|A0A0U0VMJ5_STAHA Carbamoyl-phosphate synthase large chain OS=Staphylococcus haemol
0.683292	-0.0703638	1.00378	13	7253600000	0.633405	0.538901	Q2FZU3	>tr|Q2FZU3|Q2FZU3_STAA8 Uncharacterized protein OS=Staphylococcus aureus (strain NCTC 8325) GN=SAOUHSC_00897 PE=4 SV=1 UPId=UP000008816 PPId=UP000008816
-0.702181	1.88749	0.457235	2	165180000	0.26697	0.547514	Q2FW93	>tr|Q2FW93|Q2FW93_STAA8 Uncharacterized protein OS=Staphylococcus aureus (strain NCTC 8325) GN=SAOUHSC_02406 PE=4 SV=1 UPId=UP000008816 PPId=UP000008816
0.976594	0.41375	0.261709	15	3403000000	0.896561	0.550684	Q2FZS8	>tr|Q2FZS8|Q2FZS8_STAA8 Chaperone protein ClpB OS=Staphylococcus aureus (strain NCTC 8325) GN=clpB PE=3 SV=1 UPId=UP000008816 PPId=UP000008816;>sp|Q99VB5|CLPB_STAAM Chaperone protein ClpB OS=Staphylococcus aureus (strain Mu50 / ATCC 700699) GN=clpB PE=3 SV
0.515466	0.426379	0.738219	6	6129300000	1.57934	0.560021	Q2G0S0	>tr|Q2G0S0|Q2G0S0_STAA8 50S ribosomal protein L25 OS=Staphylococcus aureus (strain NCTC 8325) GN=rplY PE=1 SV=1 UPId=UP000008816 PPId=UP000008816
0.476247	0.182451	1.1066	4	1619600000	0.786367	0.588433	Q2FZH6	>tr|Q2FZH6|Q2FZH6_STAA8 Phosphocarrier protein hpr, putative OS=Staphylococcus aureus (strain NCTC 8325) GN=SAOUHSC_01028 PE=4 SV=1 UPId=UP000008816 PPId=UP000008816
0.0339922	NaN	1.15904	2	122680000	0.317553	0.596516	A0A0U0	>tr|A0A0U0VLM0|A0A0U0VLM0_STAHA Elongation factor 4 OS=Staphylococcus haemolyticus GN=lepA PE=3 SV=1 UPId=UP000046272 PPId=UP000008816;>sp|Q2FXY7|LEPA_STAA8 Elongation factor 4 OS=Staphylococcus aureus (strain NCTC 8325) GN=lepA PE=1 SV=1 UPId=UP000008816
1.83607	-0.588512	0.55667	7	1486100000	0.317911	0.60141	Q2G227	>sp|Q2G227|DEOB_STAA8 Phosphopentomutase OS=Staphylococcus aureus (strain NCTC 8325) GN=deoB PE=3 SV=1 UPId=UP000008816 PPId=UP000008816
0.954702	-0.233581	1.09102	5	2663500000	0.541332	0.604047	P0A0F4	>sp|P0A0F4|RL11_STAA8 50S ribosomal protein L11 OS=Staphylococcus aureus (strain NCTC 8325) GN=rplK PE=3 SV=2 UPId=UP000008816 PPId=UP000008816
0.176979	1.56631	0.102323	6	1310800000	0.487558	0.615202	Q2FY34	>sp|Q2FY34|GCSPA_STAA8 Probable glycine dehydrogenase (decarboxylating) subunit 1 OS=Staphylococcus aureus (strain NCTC 8325) GN=gcvPA PE=3 SV=1 UPId=UP000008816 PPId=UP000008816
0.00711117	1.16121	0.700241	6	1189300000	0.689462	0.622853	Q2FY40	>tr|Q2FY40|Q2FY40_STAA8 Proline dipeptidase, putative OS=Staphylococcus aureus (strain NCTC 8325) GN=SAOUHSC_01626 PE=3 SV=1 UPId=UP000008816 PPId=UP000008816
0.892182	0.070666	0.911676	7	2341000000	0.81569	0.624841	Q2G0N9	>sp|Q2G0N9|RL10_STAA8 50S ribosomal protein L10 OS=Staphylococcus aureus (strain NCTC 8325) GN=rplJ PE=3 SV=1 UPId=UP000008816 PPId=UP000008816
1.19221	0.0656987	0.66111	8	1198600000	0.725349	0.639672	Q2FZD2	>sp|Q2FZD2|THIO_STAA8 Thioredoxin OS=Staphylococcus aureus (strain NCTC 8325) GN=trxA PE=2 SV=1 UPId=UP000008816 PPId=UP000008816
-0.0872997	0.622439	1.38591	4	534930000	0.566762	0.64035	Q2FZG9	>sp|Q2FZG9|RNJ1_STAA8 Ribonuclease J 1 OS=Staphylococcus aureus (strain NCTC 8325) GN=rnj1 PE=1 SV=1 UPId=UP000008816 PPId=UP000008816
0.453971	0.975194	0.564788	12	2304900000	1.28021	0.664651	Q2G030	>sp|Q2G030|TPIS_STAA8 Triosephosphate isomerase OS=Staphylococcus aureus (strain NCTC 8325) GN=tpiA PE=3 SV=1 UPId=UP000008816 PPId=UP000008816
1.66081	-0.0245565	0.363636	3	425520000	0.493584	0.666629	Q2FV14	>tr|Q2FV14|Q2FV14_STAA8 Acetyl-CoA synthetase, putative OS=Staphylococcus aureus (strain NCTC 8325) GN=SAOUHSC_02929 PE=4 SV=1 UPId=UP000008816 PPId=UP000008816;>tr|A0A0E1XL82|A0A0E1XL82_STAAU AMP-binding enzyme OS=Staphylococcus aureus subsp. aureus MN8 G
-0.163683	0.92658	1.24525	4	497710000	0.589802	0.669383	Q2FZ19	>sp|Q2FZ19|RNJ2_STAA8 Ribonuclease J 2 OS=Staphylococcus aureus (strain NCTC 8325) GN=rnj2 PE=1 SV=2 UPId=UP000008816 PPId=UP000008816
0.658028	1.76106	-0.392795	8	1577900000	0.407967	0.67543	Q2FWE8	>sp|Q2FWE8|ATPA_STAA8 ATP synthase subunit alpha OS=Staphylococcus aureus (strain NCTC 8325) GN=atpA PE=3 SV=1 UPId=UP000008816 PPId=UP000008816
0.844728	1.23337	-0.0415035	6	4444300000	0.670093	0.678865	Q2G113	>sp|Q2G113|RS6_STAA8 30S ribosomal protein S6 OS=Staphylococcus aureus (strain NCTC 8325) GN=rpsF PE=3 SV=1 UPId=UP000008816 PPId=UP000008816
0.820132	-0.00389323	1.24451	4	5253500000	0.69522	0.686918	Q2FV52	>sp|Q2FV52|ISAA_STAA8 Probable transglycosylase IsaA OS=Staphylococcus aureus (strain NCTC 8325) GN=isaA PE=1 SV=1 UPId=UP000008816 PPId=UP000008816
0.284365	0.167012	1.66502	4	541670000	0.552659	0.705466	Q2FWC3	>sp|Q2FWC3|LUXS_STAA8 S-ribosylhomocysteine lyase OS=Staphylococcus aureus (strain NCTC 8325) GN=luxS PE=3 SV=1 UPId=UP000008816 PPId=UP000008816
1.57637	0.571159	-0.0307495	10	1144800000	0.566685	0.705593	Q2FWF0	>sp|Q2FWF0|ATPB_STAA8 ATP synthase subunit beta OS=Staphylococcus aureus (strain NCTC 8325) GN=atpD PE=3 SV=1 UPId=UP000008816 PPId=UP000008816
-0.273096	1.62209	0.787288	6	770450000	0.489909	0.712094	Q2FVB2	>sp|Q2FVB2|F16PC_STAA8 Fructose-1,6-bisphosphatase class 3 OS=Staphylococcus aureus (strain NCTC 8325) GN=fbp PE=3 SV=1 UPId=UP000008816 PPId=UP000008816
0.71144	1.27808	0.194037	2	268360000	0.836749	0.727854	Q2FXQ1	>sp|Q2FXQ1|RL20_STAA8 50S ribosomal protein L20 OS=Staphylococcus aureus (strain NCTC 8325) GN=rplT PE=1 SV=1 UPId=UP000008816 PPId=UP000008816
0.263644	0.165723	1.79716	4	816450000	0.529862	0.742175	Q2FXI8	>tr|Q2FXI8|Q2FXI8_STAA8 Uncharacterized protein OS=Staphylococcus aureus (strain NCTC 8325) GN=SAOUHSC_01858 PE=4 SV=1 UPId=UP000008816 PPId=UP000008816
NaN	-0.231782	1.71747	2	94426000	0.232548	0.742844	Q2FZ51	>sp|Q2FZ51|ACP_STAA8 Acyl carrier protein OS=Staphylococcus aureus (strain NCTC 8325) GN=acpP PE=2 SV=1 UPId=UP000008816 PPId=UP000008816
0.679887	-0.291015	1.8787	8	2180400000	0.453981	0.755856	Q2FV16	>tr|Q2FV16|Q2FV16_STAA8 Probable malate:quinone oxidoreductase OS=Staphylococcus aureus (strain NCTC 8325) GN=mqo PE=3 SV=1 UPId=UP000008816 PPId=UP000008816
0.680568	0.278114	1.3259	7	1839300000	0.88607	0.761526	Q2FW39	>sp|Q2FW39|RS9_STAA8 30S ribosomal protein S9 OS=Staphylococcus aureus (strain NCTC 8325) GN=rpsI PE=3 SV=1 UPId=UP000008816 PPId=UP000008816
NaN	-0.735619	2.26304	4	386240000	0.154853	0.76371	Q2FXJ5	>sp|Q2FXJ5|SYY_STAA8 Tyrosine--tRNA ligase OS=Staphylococcus aureus (strain NCTC 8325) GN=tyrS PE=3 SV=1 UPId=UP000008816 PPId=UP000008816
0.705014	NaN	0.851106	3	155400000	1.22481	0.77806	Q2FZG8	>sp|Q2FZG8|Y1036_STAA8 UPF0356 protein SAOUHSC_01036 OS=Staphylococcus aureus (strain NCTC 8325) GN=SAOUHSC_01036 PE=3 SV=1 UPId=UP000008816 PPId=UP000008816
1.77581	1.49199	-0.90575	5	169390000	0.344565	0.787351	Q2G019	>tr|Q2G019|Q2G019_STAA8 Uncharacterized protein OS=Staphylococcus aureus (strain NCTC 8325) GN=SAOUHSC_00808 PE=1 SV=1 UPId=UP000008816 PPId=UP000008816;>tr|A0A077ULC8|A0A077ULC8_STAAU Putative lipoprotein OS=Staphylococcus aureus GN=ERS140147_02559 PE=4 S
1.57828	-0.227829	1.02622	3	5822200000	0.558463	0.792224	Q2FW79	>sp|Q2FW79|Y2425_STAA8 UPF0457 protein SAOUHSC_02425 OS=Staphylococcus aureus (strain NCTC 8325) GN=SAOUHSC_02425 PE=3 SV=1 UPId=UP000008816 PPId=UP000008816
1.21464	0.735591	0.430498	4	3007400000	1.13268	0.793576	Q2FW33	>sp|Q2FW33|RL17_STAA8 50S ribosomal protein L17 OS=Staphylococcus aureus (strain NCTC 8325) GN=rplQ PE=1 SV=1 UPId=UP000008816 PPId=UP000008816
0.370981	1.51567	0.524912	6	1903200000	0.811655	0.803854	P0A0J0	>sp|P0A0J0|SIGA_STAA8 RNA polymerase sigma factor SigA OS=Staphylococcus aureus (strain NCTC 8325) GN=sigA PE=1 SV=1 UPId=UP000008816 PPId=UP000008816
2.318	-0.190308	0.292163	4	226490000	0.393634	0.806617	Q2G1C8	>tr|Q2G1C8|Q2G1C8_STAA8 Uncharacterized protein OS=Staphylococcus aureus (strain NCTC 8325) GN=SAOUHSC_00197 PE=3 SV=1 UPId=UP000008816 PPId=UP000008816
-0.77475	1.70864	1.51962	3	579350000	0.383758	0.817835	Q2FZA4	>tr|Q2FZA4|Q2FZA4_STAA8 Uncharacterized protein OS=Staphylococcus aureus (strain NCTC 8325) GN=SAOUHSC_01135 PE=4 SV=1 UPId=UP000008816 PPId=UP000008816
0.577433	0.482087	1.41864	3	145880000	0.962719	0.826053	Q2G2D2	>tr|Q2G2D2|Q2G2D2_STAA8 Transcription termination/antitermination protein NusA OS=Staphylococcus aureus (strain NCTC 8325) GN=nusA PE=3 SV=1 UPId=UP000008816 PPId=UP000008816
1.15091	1.15703	0.198571	12	2104300000	0.921728	0.835503	Q2G1R9	>tr|Q2G1R9|Q2G1R9_STAA8 Methionine--tRNA ligase OS=Staphylococcus aureus (strain NCTC 8325) GN=metG PE=3 SV=1 UPId=UP000008816 PPId=UP000008816;>tr|A0A0U0VNB8|A0A0U0VNB8_STAHA Methionyl-tRNA synthetase OS=Staphylococcus haemolyticus GN=metS_2 PE=4 SV=1 UPI
1.04841	1.26785	0.195287	5	2581900000	0.903942	0.837182	Q2FYG7	>sp|Q2FYG7|NDK_STAA8 Nucleoside diphosphate kinase OS=Staphylococcus aureus (strain NCTC 8325) GN=ndk PE=3 SV=2 UPId=UP000008816 PPId=UP000008816
0.426498	2.78359	-0.687787	2	241040000	0.30308	0.840768	Q2FY29	>tr|Q2FY29|Q2FY29_STAA8 Uncharacterized protein OS=Staphylococcus aureus (strain NCTC 8325) GN=SAOUHSC_01644 PE=4 SV=1 UPId=UP000008816 PPId=UP000008816
1.28148	1.61538	-0.351905	5	913750000	0.526419	0.84832	Q2FXM5	>tr|Q2FXM5|Q2FXM5_STAA8 NADP-dependent malic enzyme, putative OS=Staphylococcus aureus (strain NCTC 8325) GN=SAOUHSC_01810 PE=3 SV=1 UPId=UP000008816 PPId=UP000008816
1.36653	0.34687	0.867523	6	2188700000	1.00064	0.860307	P60430	>sp|P60430|RL2_STAA8 50S ribosomal protein L2 OS=Staphylococcus aureus (strain NCTC 8325) GN=rplB PE=1 SV=1 UPId=UP000008816 PPId=UP000008816
0.622254	2.02849	-0.0609338	1	290850000	0.529313	0.863271	Q2G1Y7	>tr|Q2G1Y7|Q2G1Y7_STAA8 Uncharacterized protein OS=Staphylococcus aureus (strain NCTC 8325) GN=SAOUHSC_01061 PE=4 SV=1 UPId=UP000008816 PPId=UP000008816
-0.0268464	1.75814	NaN	2	285650000	0.292668	0.865648	A0A0U0	>tr|A0A0U0VMK6|A0A0U0VMK6_STAHA Phosphoglucomutase/phosphomannomutase alpha/beta/subunit OS=Staphylococcus haemolyticus GN=pgcA PE=3 SV=1 UPId=UP000046272 PPId=UP000008816;>sp|Q2FVC1|PGCA_STAA8 Phosphoglucomutase OS=Staphylococcus aureus (strain NCTC 8325)
0.713467	1.0303	NaN	4	450110000	0.941494	0.871882	Q2FWX8	>sp|Q2FWX8|Y2143_STAA8 Uncharacterized protein SAOUHSC_02143 OS=Staphylococcus aureus (strain NCTC 8325) GN=SAOUHSC_02143 PE=3 SV=1 UPId=UP000008816 PPId=UP000008816
0.89412	0.288105	1.44586	3	501340000	0.920829	0.876027	Q2FXZ3	>sp|Q2FXZ3|DNAJ_STAA8 Chaperone protein DnaJ OS=Staphylococcus aureus (strain NCTC 8325) GN=dnaJ PE=3 SV=1 UPId=UP000008816 PPId=UP000008816
0.665556	1.30484	0.671132	4	3436600000	1.27204	0.880509	Q2FW14	>sp|Q2FW14|RL29_STAA8 50S ribosomal protein L29 OS=Staphylococcus aureus (strain NCTC 8325) GN=rpmC PE=1 SV=1 UPId=UP000008816 PPId=UP000008816
1.40853	2.31968	-1.07971	5	323390000	0.321972	0.882833	Q2G2S0	>sp|Q2G2S0|PUR8_STAA8 Adenylosuccinate lyase OS=Staphylococcus aureus (strain NCTC 8325) GN=purB PE=3 SV=1 UPId=UP000008816 PPId=UP000008816
1.28324	1.16194	0.224482	14	30663000000	0.931695	0.889889	P02976	>sp|P02976|SPA_STAA8 Immunoglobulin G-binding protein A OS=Staphylococcus aureus (strain NCTC 8325) GN=spa PE=1 SV=3 UPId=UP000008816 PPId=UP000008816;>tr|A0A0T7MX33|A0A0T7MX33_STAAU Protein A OS=Staphylococcus aureus GN=spa PE=4 SV=1 UPId=UP000048318 PPId
-0.021086	1.52701	1.30269	3	351960000	0.716322	0.936203	Q2FZT7	>tr|Q2FZT7|Q2FZT7_STAA8 Signal peptidase I OS=Staphylococcus aureus (strain NCTC 8325) GN=SAOUHSC_00903 PE=3 SV=1 UPId=UP000008816 PPId=UP000008816
-0.222916	3.01128	0.0944313	10	3843500000	0.347694	0.960932	Q2FZ27	>sp|Q2FZ27|CODY_STAA8 GTP-sensing transcriptional pleiotropic repressor CodY OS=Staphylococcus aureus (strain NCTC 8325) GN=codY PE=3 SV=1 UPId=UP000008816 PPId=UP000008816
0.759145	NaN	1.28921	3	286650000	0.792617	1.02418	Q2G253	>tr|Q2G253|Q2G253_STAA8 Uncharacterized protein OS=Staphylococcus aureus (strain NCTC 8325) GN=SAOUHSC_00025 PE=3 SV=1 UPId=UP000008816 PPId=UP000008816
0.55044	1.98196	0.554959	6	614310000	0.786861	1.02912	Q2FY79	>sp|Q2FY79|SRRA_STAA8 Transcriptional regulatory protein SrrA OS=Staphylococcus aureus (strain NCTC 8325) GN=srrA PE=3 SV=1 UPId=UP000008816 PPId=UP000008816
1.0963	0.719838	1.3533	15	996050000	1.53756	1.05648	Q2G2B2	>sp|Q2G2B2|SASG_STAA8 Surface protein G OS=Staphylococcus aureus (strain NCTC 8325) GN=sasG PE=1 SV=1 UPId=UP000008816 PPId=UP000008816;>sp|Q931E9|PLS_STAAM Putative surface protein SAV2496/SAV2497 OS=Staphylococcus aureus (strain Mu50 / ATCC 700699) GN=SA
0.559925	1.70188	NaN	5	102840000	0.526293	1.1309	Q2FW81	>sp|Q2FW81|URTF_STAA8 Probable uridylyltransferase SAOUHSC_02423 OS=Staphylococcus aureus (strain NCTC 8325) GN=SAOUHSC_02423 PE=3 SV=1 UPId=UP000008816 PPId=UP000008816
0.580576	0.615035	2.20337	6	897540000	0.773359	1.13299	Q2FXZ1	>sp|Q2FXZ1|GRPE_STAA8 Protein GrpE OS=Staphylococcus aureus (strain NCTC 8325) GN=grpE PE=3 SV=1 UPId=UP000008816 PPId=UP000008816
1.18049	1.66872	0.573319	6	1516400000	1.15979	1.14084	Q2FW30	>sp|Q2FW30|RS13_STAA8 30S ribosomal protein S13 OS=Staphylococcus aureus (strain NCTC 8325) GN=rpsM PE=3 SV=1 UPId=UP000008816 PPId=UP000008816
1.80657	0.597605	NaN	3	261850000	0.527796	1.20209	Q2FX98	>tr|Q2FX98|Q2FX98_STAA8 Uncharacterized protein OS=Staphylococcus aureus (strain NCTC 8325) GN=SAOUHSC_01979 PE=4 SV=1 UPId=UP000008816 PPId=UP000008816
1.08984	1.34286	NaN	3	413460000	1.18062	1.21635	Q2FZB0	>tr|Q2FZB0|Q2FZB0_STAA8 Ornithine carbamoyltransferase OS=Staphylococcus aureus (strain NCTC 8325) GN=argF PE=3 SV=1 UPId=UP000008816 PPId=UP000008816
0.381632	1.29965	1.99147	4	523370000	0.922351	1.22425	Q2G045	>sp|Q2G045|HPRK_STAA8 HPr kinase/phosphorylase OS=Staphylococcus aureus (strain NCTC 8325) GN=hprK PE=3 SV=1 UPId=UP000008816 PPId=UP000008816
0.148318	0.833813	2.7021	6	6038300000	0.604095	1.22808	Q2G0D4	>tr|Q2G0D4|Q2G0D4_STAA8 Secretory antigen SsaA-like protein OS=Staphylococcus aureus (strain NCTC 8325) GN=SAOUHSC_00671 PE=4 SV=1 UPId=UP000008816 PPId=UP000008816
0.857459	2.61478	0.230133	2	746460000	0.646066	1.23412	Q2FYQ2	>tr|Q2FYQ2|Q2FYQ2_STAA8 Uncharacterized protein OS=Staphylococcus aureus (strain NCTC 8325) GN=SAOUHSC_01383 PE=4 SV=1 UPId=UP000008816 PPId=UP000008816
1.80219	1.40398	0.529647	7	1601800000	1.09545	1.24527	P0A0G2	>sp|P0A0G2|RL30_STAA8 50S ribosomal protein L30 OS=Staphylococcus aureus (strain NCTC 8325) GN=rpmD PE=1 SV=1 UPId=UP000008816 PPId=UP000008816
2.027	1.36288	0.3556	3	1618200000	0.906866	1.24849	P0C7Y1	>sp|P0C7Y1|PSMA1_STAA8 Phenol-soluble modulin alpha 1 peptide OS=Staphylococcus aureus (strain NCTC 8325) GN=psmA1 PE=3 SV=1 UPId=UP000008816 PPId=UP000008816;>sp|P0C7Z3|PSMA2_STAA8 Phenol-soluble modulin alpha 2 peptide OS=Staphylococcus aureus (strain NC
-0.255655	2.76341	NaN	2	374760000	0.252799	1.25388	Q2G0G6	>tr|Q2G0G6|Q2G0G6_STAA8 Uncharacterized protein OS=Staphylococcus aureus (strain NCTC 8325) GN=SAOUHSC_00603 PE=4 SV=1 UPId=UP000008816 PPId=UP000008816
1.00528	1.513	NaN	5	368190000	0.897391	1.25914	Q2G0L5	>sp|Q2G0L5|SDRC_STAA8 Serine-aspartate repeat-containing protein C OS=Staphylococcus aureus (strain NCTC 8325) GN=sdrC PE=3 SV=1 UPId=UP000008816 PPId=UP000008816;>sp|Q99W48|SDRC_STAAM Serine-aspartate repeat-containing protein C OS=Staphylococcus aureus (
0.829004	0.453595	2.59799	5	3187300000	0.722241	1.29353	Q2FZE9	>sp|Q2FZE9|ISDA_STAA8 Iron-regulated surface determinant protein A OS=Staphylococcus aureus (strain NCTC 8325) GN=isdA PE=1 SV=1 UPId=UP000008816 PPId=UP000008816
1.39286	1.33211	NaN	4	653470000	1.84794	1.36248	Q2G1N4	>tr|Q2G1N4|Q2G1N4_STAA8 Periplasmic binding protein, putative OS=Staphylococcus aureus (strain NCTC 8325) GN=SAOUHSC_00074 PE=4 SV=1 UPId=UP000008816 PPId=UP000008816
2.28613	0.452701	NaN	2	557800000	0.425337	1.36941	Q2G2Y4	>tr|Q2G2Y4|Q2G2Y4_STAA8 Uncharacterized protein OS=Staphylococcus aureus (strain NCTC 8325) GN=SAOUHSC_01918 PE=4 SV=1 UPId=UP000008816 PPId=UP000008816
1.21941	0.92501	2.35155	1	40892000	1.12577	1.49866	Q2G2W5	>tr|Q2G2W5|Q2G2W5_STAA8 Uncharacterized protein OS=Staphylococcus aureus (strain NCTC 8325) GN=SAOUHSC_02630 PE=4 SV=1 UPId=UP000008816 PPId=UP000008816
0.349593	2.65018	NaN	4	208670000	0.380381	1.49989	G5JM00	>tr|G5JM00|G5JM00_9STAP Cell division protein FtsZ (Fragment) OS=Staphylococcus simiae CCM 7213 GN=SS7213T_12607 PE=3 SV=1 UPId=UP000005413 PPId=UP000008816;>sp|Q2FZ89|FTSZ_STAA8 Cell division protein FtsZ OS=Staphylococcus aureus (strain NCTC 8325) GN=fts
2.03723	0.980871	NaN	4	152960000	0.668901	1.50905	Q2FWW3	>tr|Q2FWW3|Q2FWW3_STAA8 Uncharacterized protein OS=Staphylococcus aureus (strain NCTC 8325) GN=SAOUHSC_02158 PE=4 SV=1 UPId=UP000008816 PPId=UP000008816
0.547625	2.47629	NaN	2	743100000	0.44196	1.51196	Q2FX05	>tr|Q2FX05|Q2FX05_STAA8 Methionine aminopeptidase OS=Staphylococcus aureus (strain NCTC 8325) GN=map PE=3 SV=1 UPId=UP000008816 PPId=UP000008816
1.31362	1.71623	NaN	2	136700000	1.07519	1.51493	Q2FXA3	>sp|Q2FXA3|DCUP_STAA8 Uroporphyrinogen decarboxylase OS=Staphylococcus aureus (strain NCTC 8325) GN=hemE PE=3 SV=1 UPId=UP000008816 PPId=UP000008816
1.5859	NaN	1.52482	2	8745200	1.90311	1.55536	Q2FZY9	>sp|Q2FZY9|Y845_STAA8 UPF0337 protein SAOUHSC_00845 OS=Staphylococcus aureus (strain NCTC 8325) GN=SAOUHSC_00845 PE=3 SV=1 UPId=UP000008816 PPId=UP000008816;>tr|C5QT11|C5QT11_9STAP CsbD-like protein OS=Staphylococcus caprae M23864:W1 GN=HMPREF0793_2367 PE=
2.04961	NaN	1.0853	3	173760000	0.721298	1.56746	Q2G1F2	>sp|Q2G1F2|AZOR_STAA8 FMN-dependent NADH-azoreductase OS=Staphylococcus aureus (strain NCTC 8325) GN=azoR PE=3 SV=1 UPId=UP000008816 PPId=UP000008816;>tr|A0A0U0VRE5|A0A0U0VRE5_STAHA FMN-dependent NADH-azoreductase OS=Staphylococcus haemolyticus GN=azoR PE=
1.70647	1.9939	1.04664	5	2108800000	1.52292	1.58234	Q2FZ45	>sp|Q2FZ45|RS16_STAA8 30S ribosomal protein S16 OS=Staphylococcus aureus (strain NCTC 8325) GN=rpsP PE=3 SV=1 UPId=UP000008816 PPId=UP000008816
2.78386	3.13717	-1.06112	4	62631000	0.454133	1.61997	Q2G1N7	>sp|Q2G1N7|SARS_STAA8 HTH-type transcriptional regulator SarS OS=Staphylococcus aureus (strain NCTC 8325) GN=sarS PE=1 SV=1 UPId=UP000008816 PPId=UP000008816;>tr|A0A0E1XCR9|A0A0E1XCR9_STAAU HTH-type transcriptional regulator SarS OS=Staphylococcus aureus s
2.0978	3.5596	0.481644	3	1392000000	0.829931	2.04635	Q2FWD8	>sp|Q2FWD8|RL31B_STAA8 50S ribosomal protein L31 type B OS=Staphylococcus aureus (strain NCTC 8325) GN=rpmE2 PE=3 SV=1 UPId=UP000008816 PPId=UP000008816
2.21231	1.44189	2.62506	24	9025600000	1.57908	2.09309	Q2G0L4	>sp|Q2G0L4|SDRD_STAA8 Serine-aspartate repeat-containing protein D OS=Staphylococcus aureus (strain NCTC 8325) GN=sdrD PE=1 SV=1 UPId=UP000008816 PPId=UP000008816
#!{Type}E	E	E	N	N	N	N	T	T
